# Supplementary material for: Upregulation of GADD45α in light-damaged retinal pigment epithelial cells
Source: PubMed Central journal article supplement (PMC4979445; doi:10.1038/cddiscovery.2016.13), 2016-02-29
Supplement: cddiscovery201613-s5.pdf [file cddiscovery201613-s5.pdf]

| P-value (Detected) |                   | Normalized Intensity |                   | log2 (Ratio)                    | P-value (Differentially expressed) | Gene_symbol                             |
|--------------------|-------------------|----------------------|-------------------|---------------------------------|------------------------------------|-----------------------------------------|
| light-damaged      | non-light-damaged | light-damaged        | non-light-damaged | non-light-damaged/light-damaged | non-light-damaged/light-damaged    |                                         |
| 0.000123           | 0.                | 819.620911           | 24164.8262        | 4.8628164                       | 0.000001                           | <u>ATF3</u>                             |
| 0.115426           | 0.000001          | 233.72821            | 6464.28711        | 4.7667615                       | 0.000002                           | <u>PSMC2</u>                            |
| 0.97525            | 0.000004          | 89.089226            | 2001.14673        | 4.4986683                       | 0.000004                           | HSPA6   HSPA7                           |
| 0.000044           | 0.                | 987.318298           | 22230.6074        | 4.4845416                       | 0.000002                           | <u>HMOX1</u>                            |
|                    |                   |                      |                   |                                 |                                    | <u>previous version conserved probe</u> |
| 0.926103           | 0.000004          | 103.762749           | 1951.42883        | 4.2410273                       | 0.000005                           | <u>TEX36</u>                            |
| 0.979535           | 0.000009          | 86.993012            | 1487.7135         | 4.0960575                       | 0.000006                           | <u>HBEGF</u>                            |
| 0.064798           | 0.000001          | 318.625              | 5642.02881        | 4.093883                        | 0.000004                           | <u>SLC3A2</u>                           |
| 0.000003           | 0.000004          | 2169.58472           | 36690.875         | 4.0726096                       | 0.000023                           | <u>CCT2</u>                             |
| 0.050978           | 0.000001          | 273.556335           | 4755.71143        | 4.0644155                       | 0.000004                           | <u>PSMD4</u>                            |
| 0.00073            | 0.000001          | 564.930542           | 9458.83594        | 4.0187479                       | 0.000003                           | <u>COPE</u>                             |
| 0.456661           | 0.000002          | 170.841705           | 2712.49561        | 3.9705541                       | 0.000007                           | <u>previous version conserved probe</u> |
| 0.062996           | 0.000001          | 263.075256           | 4206.90186        | 3.9383866                       | 0.000004                           | <u>HSPA8</u>                            |
| 0.001534           | 0.                | 713.761963           | 10836.5967        | 3.8852907                       | 0.000004                           | <u>IL11</u>                             |
| 0.967932           | 0.000014          | 90.137337            | 1301.27124        | 3.8520208                       | 0.000001                           | NA                                      |
| 0.284649           | 0.000002          | 189.707657           | 2764.12573        | 3.8368946                       | 0.000006                           | <u>ARNTL</u>                            |
| 0.240422           | 0.000002          | 201.236847           | 2870.25439        | 3.8004704                       | 0.000006                           | <u>SLC25A25</u>                         |
| 0.000004           | 0.                | 2071.0625            | 28243.6094        | 3.7673625                       | 0.000004                           | <u>FDPS</u>                             |
| 0.94912            | 0.000014          | 97.474098            | 1323.26184        | 3.7632579                       | 0.000001                           | <u>PHB2</u>                             |
| 0.000453           | 0.000001          | 613.143494           | 8401.37402        | 3.7273846                       | 0.000007                           | <u>HNRNPA0</u>                          |
| 0.994745           | 0.000042          | 74.41571             | 984.797485        | 3.7238412                       | 0.000015                           | <u>UQCRC1</u>                           |
| 0.328305           | 0.000003          | 182.370895           | 2401.75854        | 3.6892458                       | 0.000008                           | <u>CDKN1A</u>                           |
| 0.308997           | 0.000003          | 185.515213           | 2430.44189        | 3.6807919                       | 0.000008                           | <u>PRDX3</u>                            |
| 0.143593           | 0.000002          | 223.247131           | 2930.4895         | 3.6710169                       | 0.000007                           | <u>FOSB</u>                             |
| 0.122377           | 0.000002          | 250.497955           | 3272.77832        | 3.6529413                       | 0.000007                           | <u>CYTH2</u>                            |
| 0.053892           | 0.000001          | 271.460114           | 3431.49341        | 3.5988399                       | 0.000007                           | <u>LOC344887</u>                        |
| 0.370047           | 0.000004          | 176.082245           | 2126.39771        | 3.5607395                       | 0.000001                           | <u>SUCLG1</u>                           |
| 0.003159           | 0.000001          | 444.398041           | 5472.79688        | 3.5542185                       | 0.000007                           | <u>IFITM10</u>                          |
| 0.009738           | 0.000001          | 363.693665           | 4491.82373        | 3.552669                        | 0.000007                           | <u>LUZP1</u>                            |
| 0.000685           | 0.000001          | 569.122986           | 6928.00244        | 3.5521918                       | 0.000006                           | <u>AHSA1</u>                            |
| 0.225481           | 0.000002          | 240.016861           | 2903.71826        | 3.5466885                       | 0.000001                           | <u>SRP68</u>                            |
| 0.855046           | 0.000013          | 115.291946           | 1328.04248        | 3.5178684                       | 0.000014                           | <u>AIP</u>                              |
| 0.113474           | 0.000002          | 234.776321           | 2728.74951        | 3.491304                        | 0.000009                           | <u>EIF4G2</u>                           |
| 0.377663           | 0.000001          | 426.5802             | 5016.73047        | 3.4819881                       | 0.000777                           | <u>TRA2B</u>                            |
| 0.060379           | 0.000002          | 265.171478           | 3082.51172        | 3.4798393                       | 0.000009                           | <u>XBP1</u>                             |
| 0.013365           | 0.000001          | 351.116364           | 4074.00195        | 3.4607072                       | 0.000008                           | <u>MPDU1</u>                            |
| 0.893581           | 0.000019          | 110.051399           | 1198.96704        | 3.4418506                       | 0.000018                           | <u>MCL1</u>                             |
| 0.000122           | 0.000001          | 790.273865           | 8743.66309        | 3.4278352                       | 0.000007                           | <u>UCP3</u>                             |
| 0.887535           | 0.000063          | 111.09951            | 1196.09863        | 3.4238914                       | 0.000064                           | <u>HIST1H4H</u>                         |
| 0.046316           | 0.000002          | 278.796875           | 3093.98511        | 3.4102716                       | 0.000001                           |                                         |

|          |          |            |            |           |          |                  |
|----------|----------|------------|------------|-----------|----------|------------------|
| 0.947832 | 0.000033 | 98.522209  | 1045.03271 | 3.4072366 | 0.000021 | <u>ZNF655</u>    |
| 0.925549 | 0.000028 | 103.762749 | 1089.01392 | 3.3925132 | 0.000021 | <u>RHBDD2</u>    |
| 0.990279 | 0.000086 | 79.65625   | 839.46814  | 3.3883484 | 0.000028 | <u>MAX</u>       |
| 0.983225 | 0.000066 | 84.896797  | 889.186096 | 3.3819442 | 0.000027 | <u>ARPC1B</u>    |
| 0.98842  | 0.000101 | 79.65625   | 816.521423 | 3.3471552 | 0.000033 | <u>NFIL3</u>     |
| 0.000024 | 0.       | 1152.91943 | 11870.1562 | 3.3466328 | 0.000008 | <u>ATP6V1E1</u>  |
| 0.232784 | 0.000004 | 201.236847 | 2111.09985 | 3.3450152 | 0.000014 | <u>NR1D2</u>     |
| 0.000005 | 0.       | 1945.28955 | 19445.4473 | 3.3270964 | 0.000008 | <u>DKK1</u>      |
| 0.559364 | 0.000008 | 151.975739 | 1553.6853  | 3.3209436 | 0.000017 | <u>CHMP4B</u>    |
| 0.864725 | 0.000026 | 112.147621 | 1110.04846 | 3.3020063 | 0.000025 | <u>CRK</u>       |
| 0.296534 | 0.000004 | 199.140625 | 2015.4884  | 3.2916777 | 0.000018 | <u>CAPNS1</u>    |
| 0.824921 | 0.000021 | 120.532486 | 1178.88867 | 3.2782712 | 0.000023 | <u>CCDC147</u>   |
| 0.362914 | 0.000006 | 177.130356 | 1761.16211 | 3.2694163 | 0.000017 | <u>C1orf63</u>   |
| 0.000205 | 0.000001 | 711.66571  | 7068.55127 | 3.2630208 | 0.000001 | <u>PSAT1</u>     |
| 0.044483 | 0.000001 | 613.143494 | 6093.31494 | 3.2531203 | 0.000016 | <u>CCT7</u>      |
| 0.117953 | 0.000003 | 232.680099 | 2301.36646 | 3.2514517 | 0.000015 | <u>RAF1</u>      |
|          |          |            |            |           |          | DUSP8 GLUD       |
| 0.000009 | 0.       | 1529.19043 | 14610.3789 | 3.2498828 | 0.000009 | IP3              |
| 0.747525 | 0.000046 | 101.666534 | 965.675171 | 3.2445318 | 0.000093 | <u>ARL4D</u>     |
| 0.04689  | 0.000002 | 277.748779 | 2724.92505 | 3.2334717 | 0.000014 | <u>FAM53C</u>    |
| 0.000126 | 0.000001 | 785.033325 | 7603.9751  | 3.2326546 | 0.000011 | <u>LMAN2</u>     |
| 0.012701 | 0.000001 | 704.328979 | 6836.21533 | 3.2285837 | 0.000013 | <u>SNRPB</u>     |
| 0.002207 | 0.000001 | 465.360199 | 4583.61084 | 3.220838  | 0.000012 | <u>BCAP31</u>    |
|          |          |            |            |           |          | PDE4DIP LO       |
|          |          |            |            |           |          | C101060353       |
|          |          |            |            |           |          | LOC101060        |
|          |          |            |            |           |          | 456 LOC100       |
|          |          |            |            |           |          | 996723 LOC       |
| 0.964829 | 0.000071 | 93.281662  | 873.888245 | 3.2202676 | 0.000035 | 100996761        |
|          |          |            |            |           |          | HNRNPA1P10       |
| 0.00002  | 0.       | 1209.51733 | 11372.0205 | 3.2130692 | 0.000001 | HNRNPA1L2        |
| 0.910737 | 0.000042 | 106.907074 | 987.665833 | 3.2037579 | 0.000032 | <u>ASNA1</u>     |
| 0.980607 | 0.000125 | 83.848686  | 776.364624 | 3.1982    | 0.000044 | <u>SLC30A1</u>   |
| 0.550335 | 0.000011 | 153.023849 | 1412.18042 | 3.1729119 | 0.000024 | <u>LAT2</u>      |
| 0.669961 | 0.000035 | 114.243835 | 1028.77869 | 3.1627659 | 0.000133 | <u>ETNK1</u>     |
| 0.063019 | 0.000003 | 263.075256 | 2449.56421 | 3.1565013 | 0.000017 | <u>CHMP5</u>     |
|          |          |            |            |           |          | <u>previous</u>  |
|          |          |            |            |           |          | <u>version</u>   |
|          |          |            |            |           |          | <u>conserved</u> |
| 0.62356  | 0.000014 | 144.638977 | 1311.78845 | 3.1529885 | 0.000026 | <u>probe</u>     |
| 0.007673 | 0.000001 | 378.367188 | 3530.9292  | 3.1434927 | 0.000015 | <u>AKAP8L</u>    |
| 0.000461 | 0.000001 | 611.047302 | 5610.47705 | 3.1336784 | 0.000014 | <u>RAB9A</u>     |
| 0.049865 | 0.000002 | 276.700653 | 2535.6145  | 3.1326816 | 0.000018 | <u>EDN1</u>      |
| 0.267468 | 0.000006 | 192.851974 | 1734.39087 | 3.1159833 | 0.000023 | <u>TRUB2</u>     |
|          |          |            |            |           |          | <u>previous</u>  |
|          |          |            |            |           |          | <u>version</u>   |
|          |          |            |            |           |          | <u>conserved</u> |
| 0.09908  | 0.000003 | 241.064972 | 2172.29102 | 3.1106875 | 0.000002 | <u>probe</u>     |
| 0.10128  | 0.000003 | 240.016861 | 2137.87109 | 3.0934558 | 0.000021 | <u>PFKL</u>      |
| 0.684808 | 0.000025 | 131.013565 | 1126.30237 | 3.0849203 | 0.000044 | <u>NASP</u>      |
|          |          |            |            |           |          | <u>previous</u>  |
|          |          |            |            |           |          | <u>version</u>   |
|          |          |            |            |           |          | <u>conserved</u> |
| 0.793122 | 0.003378 | 124.724922 | 1067.97937 | 3.0836552 | 0.005101 | <u>probe</u>     |

|          |          |            |            |           |          |                  |
|----------|----------|------------|------------|-----------|----------|------------------|
| 0.245967 | 0.000006 | 197.044418 | 1709.53198 | 3.0613616 | 0.000026 | <u>YARS</u>      |
| 0.128716 | 0.000004 | 228.487671 | 1981.06836 | 3.0549247 | 0.000024 | <u>MNAT1</u>     |
| 0.868152 | 0.000049 | 114.243835 | 952.289612 | 3.0479374 | 0.000044 | <u>SGK1</u>      |
| 0.000362 | 0.000001 | 646.682983 | 5590.39893 | 3.0467632 | 0.000016 | <u>MAFK</u>      |
| 0.56844  | 0.000016 | 150.927643 | 1274.5     | 3.0463124 | 0.000033 | <u>SAMD4A</u>    |
| 0.000045 | 0.000001 | 984.17395  | 8308.63086 | 3.0461154 | 0.000015 | <u>MAP1LC3B</u>  |
| 0.000208 | 0.000001 | 711.66571  | 6040.72852 | 3.0286272 | 0.000017 | <u>ARF1</u>      |
| 0.000001 | 0.       | 3795.20117 | 30743.8477 | 3.0242274 | 0.000014 | <u>GADD45A</u>   |
|          |          |            |            |           |          | <u>previous</u>  |
|          |          |            |            |           |          | <u>version</u>   |
|          |          |            |            |           |          | <u>conserved</u> |
| 0.000004 | 0.       | 2092.02466 | 16842.9043 | 3.0232325 | 0.000015 | <u>probe</u>     |
| 0.000001 | 0.       | 5968.97852 | 47494.0078 | 3.018381  | 0.000014 | <u>GAPDH</u>     |
|          |          |            |            |           |          | <u>previous</u>  |
|          |          |            |            |           |          | <u>version</u>   |
|          |          |            |            |           |          | <u>conserved</u> |
| 0.977884 | 0.000713 | 84.896797  | 695.09491  | 3.0159331 | 0.000311 | <u>probe</u>     |
| 0.51472  | 0.000015 | 157.216293 | 1296.4906  | 3.0084557 | 0.000035 | <u>LATS2</u>     |
| 0.954925 | 0.000121 | 96.425987  | 781.145203 | 3.0056898 | 0.000006 | <u>CHIC2</u>     |
| 0.877782 | 0.000418 | 76.511925  | 615.737427 | 2.9890234 | 0.000362 | <u>ENDOV</u>     |
| 0.000606 | 0.000001 | 581.700256 | 4836.0249  | 2.9806893 | 0.000019 | <u>CLU</u>       |
| 0.015245 | 0.000002 | 337.490967 | 2794.72144 | 2.9785617 | 0.000023 | <u>EIF3M</u>     |
| 0.893415 | 0.000297 | 82.800575  | 655.894226 | 2.966505  | 0.000203 | <u>RPL6</u>      |
| 0.16719  | 0.000006 | 215.91037  | 1761.16211 | 2.9656078 | 0.000031 | <u>TMEM55B</u>   |
| 0.938733 | 0.000115 | 100.618423 | 789.750183 | 2.9605728 | 0.000065 | <u>NFX1</u>      |
| 0.580402 | 0.000021 | 148.831421 | 1177.9325  | 2.9542621 | 0.000045 | <u>TACO1</u>     |
| 0.096948 | 0.000004 | 242.113083 | 1963.85828 | 2.9529727 | 0.000003 | <u>METT17</u>    |
| 0.064355 | 0.000004 | 262.02713  | 2051.8208  | 2.8972925 | 0.000032 | <u>CHCHD7</u>    |
| 0.651292 | 0.000031 | 141.494659 | 1070.84778 | 2.8944036 | 0.000054 | <u>ZHX2</u>      |
| 0.99402  | 0.010791 | 75.463821  | 564.1073   | 2.882175  | 0.005661 | <u>AKT3</u>      |
| 0.176574 | 0.000004 | 258.882812 | 1998.27832 | 2.8762217 | 0.000051 | <u>ZNF451</u>    |
| 0.642019 | 0.000031 | 142.54277  | 1059.37439 | 2.867544  | 0.000057 | <u>ATF1</u>      |
| 0.954432 | 0.000195 | 96.425987  | 710.392761 | 2.8645769 | 0.000009 | <u>ATXN7L3</u>   |
| 0.704504 | 0.000078 | 116.34005  | 857.634277 | 2.8645019 | 0.000196 | <u>SMPDL3A</u>   |
| 0.970362 | 0.000262 | 91.185448  | 672.148193 | 2.8629454 | 0.000097 | <u>ING3</u>      |
| 0.001382 | 0.000001 | 504.140228 | 3882.77905 | 2.8616358 | 0.000027 | <u>TMCO1</u>     |
| 0.1097   | 0.000004 | 269.363892 | 2043.2157  | 2.8495216 | 0.000043 | <u>NOP56</u>     |
| 0.997358 | 0.001314 | 69.175163  | 504.828217 | 2.8470187 | 0.000155 | <u>PPP2R2A</u>   |
| 0.532413 | 0.000023 | 155.120071 | 1138.73181 | 2.8421724 | 0.000056 | <u>TGFB2</u>     |
| 0.321764 | 0.000013 | 183.419006 | 1355.76978 | 2.8364879 | 0.000049 | <u>CCDC101</u>   |
| 0.01495  | 0.000002 | 343.779602 | 2583.42017 | 2.8361674 | 0.000033 | <u>RPS6KB2</u>   |
|          |          |            |            |           |          | NBPF14 LOC       |
|          |          |            |            |           |          | 101060684        |
|          |          |            |            |           |          | LOC1010603       |
|          |          |            |            |           |          | 62               |
| 0.000655 | 0.       | 1564.82605 | 11195.1396 | 2.8172888 | 0.000028 | <u>SFPQ</u>      |
| 0.000064 | 0.000002 | 907.662048 | 6570.41602 | 2.8148972 | 0.000064 | <u>FAM134B</u>   |
| 0.973151 | 0.000374 | 89.089226  | 631.991394 | 2.8071662 | 0.000125 | <u>previous</u>  |
|          |          |            |            |           |          | <u>version</u>   |
|          |          |            |            |           |          | <u>conserved</u> |
| 0.035553 | 0.000002 | 350.068268 | 2574.81519 | 2.804073  | 0.000041 | <u>probe</u>     |
| 0.000021 | 0.000001 | 1197.98816 | 8524.71289 | 2.8024697 | 0.000026 | <u>IMPDH2</u>    |
| 0.001494 | 0.000003 | 513.573181 | 3790.99219 | 2.8006164 | 0.000055 | <u>IDH3B</u>     |

|          |          |            |            |           |          | <u>previous</u>                                                                                         |
|----------|----------|------------|------------|-----------|----------|---------------------------------------------------------------------------------------------------------|
|          |          |            |            |           |          | <u>version</u>                                                                                          |
|          |          |            |            |           |          | <u>conserved</u>                                                                                        |
|          |          |            |            |           |          | <u>probe</u>                                                                                            |
| 0.020596 | 0.000003 | 320.721222 | 2352.99658 | 2.8000492 | 0.000038 | <u>ACVR1</u>                                                                                            |
| 0.898248 | 0.000175 | 103.762749 | 725.690552 | 2.7904488 | 0.000117 | <u>ACBD7</u>                                                                                            |
| 0.348669 | 0.000015 | 179.226562 | 1275.45618 | 2.7840379 | 0.000058 | <u>FILIP1L</u>                                                                                          |
| 0.000171 | 0.000001 | 737.868408 | 5290.1792  | 2.7781756 | 0.000003 | <u>ZNF462</u>                                                                                           |
| 0.998059 | 0.002104 | 67.078949  | 465.627533 | 2.7744253 | 0.000202 | MT1M MT1JP                                                                                              |
| 0.012312 | 0.000003 | 383.607727 | 2765.08179 | 2.7717816 | 0.000047 | <u>ARMCX6</u>                                                                                           |
| 0.750771 | 0.000062 | 129.965469 | 902.571655 | 2.7708678 | 0.000083 | <u>NUDT9</u>                                                                                            |
| 0.012696 | 0.000003 | 347.972046 | 2459.12524 | 2.7442072 | 0.000042 | <u>IDI1</u>                                                                                             |
| 0.031304 | 0.000003 | 306.047699 | 2160.81787 | 2.7424631 | 0.000046 | <u>BCR</u>                                                                                              |
| 0.994021 | 0.001315 | 75.463821  | 503.872101 | 2.7187442 | 0.0002   | <u>IKBIP</u>                                                                                            |
| 0.007934 | 0.000002 | 376.270966 | 2606.36694 | 2.7144096 | 0.000044 | <u>ABR</u>                                                                                              |
| 0.977831 | 0.000867 | 81.752472  | 541.160583 | 2.7065938 | 0.000214 | <u>IGBP1</u>                                                                                            |
| 0.614327 | 0.000045 | 145.687088 | 968.543518 | 2.7009118 | 0.000091 | SMN2 SMN1                                                                                               |
| 0.056655 | 0.000005 | 268.315796 | 1841.47571 | 2.6996707 | 0.000055 | <u>CNPY3</u>                                                                                            |
| 0.471677 | 0.000029 | 162.456833 | 1077.54053 | 2.6918933 | 0.000084 | <u>TAB2</u>                                                                                             |
| 0.000848 | 0.000004 | 548.160767 | 3732.66919 | 2.6846185 | 0.000103 | <u>PRPF18</u>                                                                                           |
| 0.75944  | 0.000084 | 128.917358 | 844.248718 | 2.6839774 | 0.000109 | <u>MDH1</u>                                                                                             |
| 0.000005 | 0.       | 2079.44751 | 13289.9854 | 2.6764759 | 0.000034 | <u>PLD3</u>                                                                                             |
| 0.48893  | 0.000032 | 160.360611 | 1050.76929 | 2.6751184 | 0.000091 | <u>TEX10</u>                                                                                            |
| 0.16358  | 0.00001  | 216.958481 | 1448.51282 | 2.6740654 | 0.000069 | <u>FIP1L1</u>                                                                                           |
| 0.992323 | 0.001373 | 77.560036  | 501.003754 | 2.6709536 | 0.000228 | <u>REV3L</u>                                                                                            |
| 0.001541 | 0.000001 | 494.707245 | 3329.18921 | 2.6678727 | 0.000045 | <u>RBM34</u>                                                                                            |
| 0.539875 | 0.000039 | 154.07196  | 1001.05139 | 2.6643158 | 0.000099 | <u>RTCA</u>                                                                                             |
| 0.951601 | 0.000385 | 97.474098  | 625.298584 | 2.6619896 | 0.000166 | <u>GTF2H1</u>                                                                                           |
| 0.004516 | 0.       | 1739.86023 | 11052.6787 | 2.6474785 | 0.000056 | <u>OR4S2</u>                                                                                            |
| 0.977488 | 0.000717 | 88.041122  | 559.326721 | 2.647465  | 0.000201 | <u>NFX1</u>                                                                                             |
| 0.081524 | 0.000007 | 250.497955 | 1652.16504 | 2.6429086 | 0.000069 | <u>IP6K2</u>                                                                                            |
| 0.026016 | 0.000004 | 308.143921 | 2031.74231 | 2.6400223 | 0.000061 | <u>YKT6</u>                                                                                             |
| 0.937907 | 0.000354 | 100.618423 | 634.859741 | 2.6381484 | 0.000174 | <u>NOTCH1</u>                                                                                           |
| 0.893566 | 0.00022  | 110.051399 | 694.138794 | 2.6352096 | 0.000154 | <u>GFOD1</u>                                                                                            |
| 0.623088 | 0.000059 | 144.638977 | 913.088928 | 2.6243324 | 0.000116 | <u>ORC5</u>                                                                                             |
| 0.528911 | 0.000069 | 140.446548 | 881.53717  | 2.6170926 | 0.021603 | <u>NXN</u>                                                                                              |
| 0.951342 | 0.00046  | 97.474098  | 605.220215 | 2.6147546 | 0.000194 | <u>ZNF7</u>                                                                                             |
| 0.961746 | 0.000571 | 94.329773  | 582.273438 | 2.6061195 | 0.000209 | <u>EXPH5</u>                                                                                            |
| 0.000494 | 0.000001 | 603.710571 | 3873.21802 | 2.5988911 | 0.000052 | NBPF1 LOC10105961 NBPF12 LOC101060238 NBPF14 LOC101060684 LOC101060298 LOC101060362 NBPF10 LOC101060692 |
| 0.847234 | 0.000178 | 117.388161 | 723.77832  | 2.5985598 | 0.00016  | TIMM23B TIMM23                                                                                          |
| 0.000803 | 0.000001 | 553.401306 | 3532.84131 | 2.5919117 | 0.000054 | <u>LCOR</u>                                                                                             |
| 0.951608 | 0.000531 | 97.474098  | 589.922363 | 2.5777022 | 0.000219 | <u>EMC3</u>                                                                                             |
| 0.000057 | 0.000001 | 931.768555 | 5739.55273 | 2.5745585 | 0.00005  | <u>THUMP2D</u>                                                                                          |
| 0.128728 | 0.000011 | 228.487671 | 1426.52222 | 2.5725831 | 0.00009  |                                                                                                         |

|          |          |            |            |           |          |                  |
|----------|----------|------------|------------|-----------|----------|------------------|
| 0.000051 | 0.000001 | 956.923157 | 5873.40869 | 2.5720178 | 0.00005  | <u>LRPAP1</u>    |
| 0.994745 | 0.002906 | 74.41571   | 448.41748  | 2.5701712 | 0.000391 | <u>ILVBL</u>     |
| 0.000164 | 0.000001 | 744.157104 | 4622.81152 | 2.5631595 | 0.000054 | <u>EIF1B</u>     |
| 0.057856 | 0.000007 | 267.2677   | 1673.19958 | 2.5622763 | 0.000085 | <u>MOB2</u>      |
|          |          |            |            |           |          | <u>previous</u>  |
|          |          |            |            |           |          | <u>version</u>   |
|          |          |            |            |           |          | <u>conserved</u> |
| 0.073192 | 0.000008 | 255.738495 | 1592.88599 | 2.5585204 | 0.000087 | <u>probe</u>     |
| 0.007935 | 0.000003 | 376.270966 | 2344.3916  | 2.5557749 | 0.00007  | <u>NGF</u>       |
|          |          |            |            |           |          | LOC1010603       |
| 0.651291 | 0.000305 | 141.494659 | 851.897644 | 2.5548785 | 0.000551 | 99  <u>CDR2</u>  |
| 0.80929  | 0.000165 | 122.6287   | 734.295593 | 2.5531434 | 0.000176 | <u>GET4</u>      |
| 0.003557 | 0.000002 | 429.724518 | 2644.61157 | 2.5393123 | 0.000072 | <u>CALR</u>      |
| 0.380998 | 0.000024 | 188.659546 | 1135.86353 | 2.5384162 | 0.000275 | <u>AGPAT2</u>    |
| 0.004068 | 0.000002 | 420.291534 | 2581.50806 | 2.5350662 | 0.000071 | <u>SOAT1</u>     |
| 0.013135 | 0.000004 | 346.92395  | 2123.5293  | 2.5289905 | 0.00008  | <u>C1QBP</u>     |
| 0.019671 | 0.000004 | 325.961761 | 1987.76111 | 2.5232173 | 0.000084 | <u>CGRRF1</u>    |
|          |          |            |            |           |          | <u>previous</u>  |
|          |          |            |            |           |          | <u>version</u>   |
|          |          |            |            |           |          | <u>conserved</u> |
| 0.000151 | 0.000001 | 760.926819 | 4588.39111 | 2.5207221 | 0.000062 | <u>probe</u>     |
| 0.939695 | 0.00056  | 100.618423 | 584.185669 | 2.5177552 | 0.000257 | <u>SUPT3H</u>    |
| 0.004207 | 0.000002 | 447.542358 | 2711.53955 | 2.5172282 | 0.000076 | <u>SPTBN1</u>    |
| 0.412128 | 0.000039 | 170.841705 | 1002.00751 | 2.5074704 | 0.000151 | <u>ASB6</u>      |
| 0.000177 | 0.000001 | 732.627869 | 4378.04639 | 2.5030544 | 0.000065 | <u>CITED2</u>    |
| 0.001481 | 0.000002 | 497.851562 | 2985.94409 | 2.5024794 | 0.000074 | <u>THAP7</u>     |
| 0.660518 | 0.000099 | 140.446548 | 815.565308 | 2.5014804 | 0.000178 | <u>C7orf25</u>   |
| 0.947838 | 0.00069  | 98.522209  | 563.151184 | 2.4950557 | 0.000286 | <u>TMEM217</u>   |
| 0.085114 | 0.00001  | 248.401733 | 1475.28394 | 2.4927466 | 0.000109 | <u>CNST</u>      |
| 0.775928 | 0.000181 | 126.821136 | 720.909973 | 2.4743391 | 0.000221 | <u>AKT3</u>      |
| 0.44468  | 0.000028 | 189.707657 | 1092.83838 | 2.47431   | 0.005656 | <u>ABCF2</u>     |
| 0.080467 | 0.00001  | 251.546051 | 1474.32788 | 2.4725099 | 0.000116 | <u>TPRN</u>      |
| 0.208229 | 0.00002  | 208.573608 | 1193.23035 | 2.4553754 | 0.000149 | <u>ATG13</u>     |
| 0.995388 | 0.004877 | 73.3676    | 405.392365 | 2.4469557 | 0.00053  | <u>INO80</u>     |
| 0.083344 | 0.000012 | 249.449844 | 1428.43445 | 2.439815  | 0.000141 | <u>PVR</u>       |
|          |          |            |            |           |          | <u>previous</u>  |
|          |          |            |            |           |          | <u>version</u>   |
|          |          |            |            |           |          | <u>conserved</u> |
| 0.000969 | 0.000002 | 535.583496 | 3071.99438 | 2.4382242 | 0.000088 | <u>probe</u>     |
| 0.000006 | 0.000001 | 1710.51318 | 9420.5918  | 2.4356773 | 0.000069 | <u>ID1</u>       |
| 0.00722  | 0.000003 | 382.559631 | 2198.1062  | 2.4345127 | 0.000102 | <u>RPS20</u>     |
| 0.000991 | 0.000002 | 533.487244 | 3039.48657 | 2.4285845 | 0.000091 | <u>CYP1A1</u>    |
| 0.000014 | 0.000001 | 1651.81909 | 9054.40039 | 2.4264201 | 0.000073 | <u>ILF2</u>      |
| 0.000046 | 0.000001 | 975.789062 | 5416.38623 | 2.4226711 | 0.000079 | <u>CITED2</u>    |
| 0.061858 | 0.000009 | 265.171478 | 1503.96741 | 2.4205004 | 0.000133 | <u>NACA</u>      |
| 0.0052   | 0.000003 | 403.52179  | 2294.67383 | 2.4191522 | 0.000113 | <u>ERH</u>       |
| 0.742008 | 0.000186 | 131.013565 | 717.08551  | 2.4166463 | 0.000258 | <u>FNBP1L</u>    |
| 0.365885 | 0.000008 | 276.700653 | 1567.07092 | 2.4160646 | 0.009043 | <u>PEX13</u>     |
| 0.000332 | 0.000001 | 649.827332 | 3663.8291  | 2.4132076 | 0.00009  | <u>MBD2</u>      |
| 0.001111 | 0.000002 | 523.006165 | 2944.8313  | 2.4116804 | 0.000097 | <u>PHF5A</u>     |
|          |          |            |            |           |          | <u>previous</u>  |
|          |          |            |            |           |          | <u>version</u>   |
|          |          |            |            |           |          | <u>conserved</u> |
| 0.000077 | 0.000001 | 870.97821  | 4826.46387 | 2.4079348 | 0.000087 | <u>probe</u>     |

|          |          |            |            |           |          |                  |
|----------|----------|------------|------------|-----------|----------|------------------|
| 0.644528 | 0.000311 | 120.532486 | 650.157532 | 2.3997835 | 0.00266  | <u>SCAF8</u>     |
| 0.001576 | 0.000002 | 492.611023 | 2736.39844 | 2.3923514 | 0.000105 | <u>EPHA4</u>     |
| 0.584401 | 0.000113 | 146.735199 | 792.61853  | 2.3920089 | 0.000328 | <u>FIBP</u>      |
| 0.309342 | 0.000025 | 205.429276 | 1117.69739 | 2.3845205 | 0.000364 | <u>LSM1</u>      |
|          |          |            |            |           |          | ERCC5   BIVM     |
| 0.817174 | 0.000441 | 121.580597 | 648.2453   | 2.3822666 | 0.000455 | -ERCC5           |
| 0.000444 | 0.000002 | 615.239746 | 3394.20483 | 2.3820785 | 0.00011  | <u>DTD1</u>      |
| 0.002895 | 0.000002 | 450.686676 | 2490.677   | 2.3810128 | 0.000114 | <u>DENND5B</u>   |
| 0.809289 | 0.000304 | 122.6287   | 653.025879 | 2.3797607 | 0.000319 | <u>ILF3</u>      |
| 0.235788 | 0.000029 | 199.140625 | 1077.54053 | 2.3795427 | 0.000191 | <u>FERMT2</u>    |
| 0.001019 | 0.000002 | 531.391052 | 2920.92847 | 2.3771023 | 0.000108 | <u>PICALM</u>    |
| 0.150868 | 0.000019 | 221.150909 | 1202.7915  | 2.3770144 | 0.000178 | <u>KLF6</u>      |
| 0.405999 | 0.000056 | 171.889801 | 923.606201 | 2.376989  | 0.000237 | <u>UBAC2</u>     |
| 0.996006 | 0.008877 | 71.271385  | 373.840607 | 2.3761085 | 0.000895 | <u>WDR45B</u>    |
| 0.000354 | 0.000001 | 641.442444 | 3523.28027 | 2.3757038 | 0.000102 | <u>MTCH1</u>     |
| 0.000204 | 0.000001 | 712.713806 | 3899.98926 | 2.3729924 | 0.000099 | <u>NOP56</u>     |
| 0.050403 | 0.000009 | 274.604462 | 1507.79187 | 2.3719037 | 0.000152 | <u>PSMB8</u>     |
| 0.114477 | 0.000009 | 277.748779 | 1524.04578 | 2.3703243 | 0.000219 | <u>NKIRAS1</u>   |
| 0.497287 | 0.000145 | 159.3125   | 849.029297 | 2.3683027 | 0.000416 | <u>LRRC58</u>    |
| 0.652349 | 0.000155 | 140.446548 | 743.85675  | 2.3646925 | 0.000304 | <u>GALNT10</u>   |
| 0.135515 | 0.000009 | 271.460114 | 1479.1084  | 2.3614623 | 0.000249 | <u>PLTP</u>      |
| 0.240811 | 0.000032 | 198.092514 | 1056.50598 | 2.359077  | 0.000206 | <u>PLXNB1</u>    |
| 0.586717 | 0.000119 | 148.831421 | 784.01355  | 2.3540707 | 0.000278 | <u>ARL5B</u>     |
| 0.623541 | 0.000138 | 144.638977 | 761.066772 | 2.3536606 | 0.000288 | <u>RBAK</u>      |
| 0.226476 | 0.000007 | 303.951477 | 1654.07727 | 2.3534572 | 0.000852 | <u>AKR1A1</u>    |
| 0.071624 | 0.000012 | 256.786591 | 1385.4093  | 2.3512925 | 0.000171 | <u>PP12719</u>   |
|          |          |            |            |           |          | <u>previous</u>  |
|          |          |            |            |           |          | <u>version</u>   |
|          |          |            |            |           |          | <u>conserved</u> |
| 0.51471  | 0.000092 | 157.216293 | 827.994751 | 2.3512923 | 0.000265 | <u>probe</u>     |
|          |          |            |            |           |          | TIMM23B   TI     |
| 0.00044  | 0.000002 | 616.287842 | 3315.80347 | 2.3460664 | 0.000114 | MM23             |
| 0.076399 | 0.000012 | 253.642273 | 1360.55029 | 2.344126  | 0.000177 | <u>CSDE1</u>     |
| 0.000064 | 0.000001 | 906.613892 | 4797.78027 | 2.3428518 | 0.000104 | <u>COPS6</u>     |
| 0.000015 | 0.000001 | 1311.18384 | 6807.53223 | 2.3426085 | 0.000097 | <u>TIPARP</u>    |
| 0.000664 | 0.000002 | 572.267273 | 3071.03833 | 2.342504  | 0.000118 | <u>CFDP1</u>     |
| 0.000471 | 0.000001 | 616.287842 | 3301.46191 | 2.3398408 | 0.000116 | <u>PROCR</u>     |
| 0.967689 | 0.001908 | 92.233551  | 473.276459 | 2.3385756 | 0.000548 | <u>ATRAID</u>    |
| 0.000033 | 0.000001 | 1060.68591 | 5531.11963 | 2.3369858 | 0.000102 | <u>NDUFV1</u>    |
| 0.000027 | 0.000001 | 1112.04321 | 5778.75342 | 2.3346205 | 0.000102 | <u>SAP30</u>     |
| 0.00003  | 0.000001 | 1128.81299 | 5855.24268 | 2.3327951 | 0.000104 | <u>PPP1R10</u>   |
| 0.947732 | 0.001331 | 98.522209  | 502.915985 | 2.3313313 | 0.000513 | <u>ZBTB38</u>    |
| 0.010083 | 0.000004 | 361.597473 | 1938.04321 | 2.3301892 | 0.000149 | <u>CLCF1</u>     |
| 0.974693 | 0.002477 | 89.089226  | 453.198059 | 2.3258755 | 0.000609 | <u>CCNYL1</u>    |
| 0.000013 | 0.000001 | 1378.26282 | 7050.38525 | 2.3218163 | 0.000103 | <u>UQCRC2</u>    |
| 0.321757 | 0.000049 | 183.419006 | 951.333496 | 2.321329  | 0.000252 | <u>CASP4</u>     |
| 0.000003 | 0.       | 2233.51929 | 11203.7441 | 2.3211845 | 0.000097 | <u>GRN</u>       |
| 0.967691 | 0.002054 | 92.233551  | 467.539764 | 2.3209253 | 0.000585 | <u>DNAJB4</u>    |
| 0.514718 | 0.000101 | 157.216293 | 810.784729 | 2.3200739 | 0.000296 | <u>POLR3H</u>    |
| 0.958585 | 0.001713 | 95.377884  | 481.88147  | 2.3162904 | 0.000566 | <u>BRD1</u>      |
| 0.16022  | 0.000024 | 218.006592 | 1132.99512 | 2.3129066 | 0.000223 | <u>TFAM</u>      |
| 0.000753 | 0.000002 | 559.690002 | 2935.27026 | 2.3095215 | 0.000133 | <u>MAGOH</u>     |
| 0.000008 | 0.000001 | 1558.53748 | 7886.02881 | 2.3081478 | 0.000106 | <u>SEP15</u>     |
| 0.004454 | 0.000003 | 414.002899 | 2184.7207  | 2.3072873 | 0.000151 | <u>YIPF3</u>     |

|          |          |            |            |           |          |                  |
|----------|----------|------------|------------|-----------|----------|------------------|
| 0.070103 | 0.000013 | 257.834717 | 1349.0769  | 2.306774  | 0.000199 | <u>ZBTB2</u>     |
| 0.000008 | 0.000001 | 1559.58557 | 7853.521   | 2.3011278 | 0.00018  | <u>EEF1D</u>     |
| 0.136579 | 0.000021 | 226.391449 | 1166.45911 | 2.296907  | 0.00023  | <u>RYBP</u>      |
| 0.817167 | 0.000441 | 121.580597 | 610.000793 | 2.2942585 | 0.000439 | <u>C11orf96</u>  |
| 0.135609 | 0.000024 | 226.391449 | 1162.63464 | 2.2921779 | 0.000249 | <u>PPP1R15A</u>  |
| 0.854414 | 0.000582 | 116.34005  | 580.361206 | 2.2896173 | 0.000474 | <u>ITFG2</u>     |
| 0.215853 | 0.000026 | 218.006592 | 1113.87292 | 2.2883959 | 0.00032  | <u>SPTSSA</u>    |
| 0.997365 | 0.036484 | 69.175163  | 339.420502 | 2.2848677 | 0.00717  | <u>FBXW7</u>     |
| 0.149964 | 0.000032 | 221.150909 | 1128.2146  | 2.2848429 | 0.000301 | <u>ZNF131</u>    |
| 0.000029 | 0.000001 | 1092.12915 | 5490.96289 | 2.2837836 | 0.000122 | <u>AP3D1</u>     |
| 0.326472 | 0.000014 | 255.738495 | 1315.61292 | 2.283132  | 0.003317 | <u>ZCCHC8</u>    |
| 0.85328  | 0.000598 | 116.34005  | 577.492859 | 2.2824469 | 0.000489 | <u>RAB30</u>     |
| 0.302745 | 0.000051 | 186.563324 | 942.728455 | 2.2817402 | 0.000286 | <u>DIP2B</u>     |
| 0.316879 | 0.000005 | 368.934204 | 1912.22815 | 2.2800806 | 0.013268 | <u>EVA1A</u>     |
| 0.910672 | 0.001013 | 106.907074 | 526.818848 | 2.27897   | 0.000554 | <u>UQCRB</u>     |
| 0.859947 | 0.000645 | 115.291946 | 569.843994 | 2.2770026 | 0.000506 | <u>WARS</u>      |
|          |          |            |            |           |          | LOC1006530       |
| 0.000026 | 0.000001 | 1129.86108 | 5646.80957 | 2.2768503 | 0.000124 | 71 CRTAP         |
| 0.995396 | 0.010845 | 73.3676    | 355.674438 | 2.2650217 | 0.001035 | <u>PRRG4</u>     |
| 0.000012 | 0.000001 | 1383.5033  | 6806.57617 | 2.2648007 | 0.000125 | <u>COX7A2L</u>   |
| 0.000094 | 0.000001 | 833.246338 | 4210.72607 | 2.2644885 | 0.000138 | <u>TRIB3</u>     |
| 0.001448 | 0.000002 | 500.995911 | 2539.43896 | 2.2578597 | 0.000166 | <u>ZNF259</u>    |
| 0.532411 | 0.000133 | 155.120071 | 766.803467 | 2.2577287 | 0.000376 | <u>CYB5D2</u>    |
| 0.074782 | 0.000015 | 254.690384 | 1282.14893 | 2.2523329 | 0.000244 | <u>AGPAT2</u>    |
| 0.153248 | 0.000027 | 220.102798 | 1096.66284 | 2.2512886 | 0.000276 | <u>GFM2</u>      |
| 0.56739  | 0.000169 | 148.831421 | 731.427246 | 2.2508798 | 0.000582 | <u>C9orf85</u>   |
| 0.070176 | 0.000015 | 257.834717 | 1297.44678 | 2.2505828 | 0.000244 | <u>RAB11FIP1</u> |
|          |          |            |            |           |          | <u>previous</u>  |
|          |          |            |            |           |          | <u>version</u>   |
|          |          |            |            |           |          | <u>conserved</u> |
| 0.992169 | 0.011888 | 73.3676    | 350.89386  | 2.2462051 | 0.001297 | <u>probe</u>     |
| 0.014959 | 0.000006 | 338.539062 | 1706.66357 | 2.2382971 | 0.000213 | <u>PARD3</u>     |
| 0.000086 | 0.000001 | 851.064148 | 4214.55078 | 2.2361898 | 0.000151 | <u>EGR1</u>      |
| 0.001002 | 0.000002 | 532.439148 | 2641.74316 | 2.2294674 | 0.000179 | <u>OR4D9</u>     |
| 0.011548 | 0.000006 | 355.308807 | 1775.50378 | 2.2252408 | 0.000219 | <u>TMEM98</u>    |
| 0.000031 | 0.000001 | 1077.45557 | 5201.26025 | 2.2216819 | 0.000151 | <u>CNIH</u>      |
| 0.000088 | 0.000001 | 845.823608 | 4145.71045 | 2.2211784 | 0.000159 | <u>NUDT5</u>     |
| 0.003775 | 0.000004 | 425.532074 | 2117.79272 | 2.2207371 | 0.000202 | <u>LPIN2</u>     |
|          |          |            |            |           |          | MSANTD3 MS       |
|          |          |            |            |           |          | ANTD3-           |
| 0.000082 | 0.000001 | 858.40094  | 4204.03369 | 2.2205919 | 0.000159 | TMEFF1           |
| 0.881267 | 0.000961 | 112.147621 | 531.599426 | 2.2187856 | 0.000648 | <u>FAM210A</u>   |
|          |          |            |            |           |          | <u>previous</u>  |
|          |          |            |            |           |          | <u>version</u>   |
|          |          |            |            |           |          | <u>conserved</u> |
| 0.761728 | 0.00213  | 98.522209  | 464.671417 | 2.2168618 | 0.006246 | <u>probe</u>     |
| 0.438661 | 0.003832 | 166.649261 | 803.135803 | 2.2167758 | 0.009936 | <u>CREB5</u>     |
| 0.000006 | 0.000001 | 1758.7262  | 8323.92871 | 2.2158838 | 0.000143 | <u>CLTA</u>      |
| 0.000062 | 0.000001 | 912.902588 | 4438.28125 | 2.2158496 | 0.00016  | <u>TAF9</u>      |
| 0.042818 | 0.000002 | 592.181335 | 2899.89404 | 2.2109546 | 0.000466 | <u>CLASP1</u>    |
| 0.117952 | 0.000024 | 232.680099 | 1131.08289 | 2.210514  | 0.000306 | <u>DNTTIP1</u>   |
| 0.007672 | 0.000005 | 378.367188 | 1871.11523 | 2.2097919 | 0.000222 | <u>CHODL-AS1</u> |
| 0.000278 | 0.000002 | 672.885681 | 3287.12012 | 2.2079033 | 0.000178 | <u>TRPC4</u>     |
| 0.00849  | 0.000005 | 372.078552 | 1837.65125 | 2.2078216 | 0.000226 | <u>LSM4</u>      |

|          |          |            |            |           |          |                            |
|----------|----------|------------|------------|-----------|----------|----------------------------|
| 0.623488 | 0.000228 | 144.638977 | 689.358215 | 2.2065771 | 0.000492 | <u>RBM48</u>               |
| 0.067174 | 0.000016 | 259.930939 | 1263.98279 | 2.2005297 | 0.000291 | <u>CRABP2</u>              |
| 0.025145 | 0.000003 | 439.157501 | 2151.25659 | 2.1988893 | 0.000315 | <u>PCDHA3</u>              |
| 0.000779 | 0.000002 | 634.105713 | 3070.08228 | 2.1944936 | 0.000201 | <u>CDIPT</u>               |
| 0.001393 | 0.000003 | 503.092102 | 2437.13477 | 2.1902766 | 0.00021  | <u>FUS</u>                 |
| 0.954908 | 0.002709 | 96.425987  | 446.505249 | 2.1901716 | 0.000894 | <u>ZNF394</u>              |
| 0.015957 | 0.000004 | 410.858551 | 2004.01501 | 2.1893953 | 0.00028  | <u>RPS19BP1</u>            |
| 0.741986 | 0.000437 | 131.013565 | 610.956909 | 2.1821375 | 0.000607 | <u>LAMTOR1</u>             |
| 0.01293  | 0.000006 | 346.92395  | 1682.76074 | 2.1806014 | 0.000259 | <u>RNF6</u>                |
| 0.000004 | 0.000001 | 2032.28259 | 9285.7793  | 2.1753514 | 0.000162 | <u>DUSP14</u>              |
| 0.001074 | 0.000002 | 527.198608 | 2508.84326 | 2.1663939 | 0.000225 | <u>HELZ</u>                |
| 0.000003 | 0.       | 2305.83887 | 10401.5645 | 2.166232  | 0.000165 | <u>HSPA1B</u>              |
| 0.997101 | 0.024398 | 69.175163  | 310.737061 | 2.1620957 | 0.001728 | <u>ENTPD7</u>              |
| 0.883564 | 0.00136  | 110.051399 | 501.003754 | 2.1618793 | 0.00088  | <u>TOE1</u>                |
| 0.001296 | 0.000003 | 509.380768 | 2418.96851 | 2.1612075 | 0.000232 | <u>GTF2IRD1</u>            |
| 0.000001 | 0.       | 8346.08887 | 36398.3047 | 2.1596252 | 0.000157 | <u>EIF3H</u>               |
| 0.993217 | 0.01333  | 76.511925  | 344.20105  | 2.1588855 | 0.001462 | <u>ST6GALNAC</u>           |
| 0.488675 | 0.000157 | 160.360611 | 741.944519 | 2.157884  | 0.000527 | <u>KLHL15</u>              |
| 0.000333 | 0.000002 | 648.779236 | 3060.521   | 2.1571148 | 0.000216 | <u>SAE1</u>                |
| 0.893613 | 0.001391 | 110.051399 | 499.091522 | 2.1563447 | 0.000843 | <u>DCP1A</u>               |
|          |          |            |            |           |          | <u>previous</u>            |
|          |          |            |            |           |          | <u>version</u>             |
|          |          |            |            |           |          | <u>conserved</u>           |
| 0.130111 | 0.000028 | 232.680099 | 1088.05774 | 2.1546698 | 0.000398 | <u>probe</u>               |
| 0.000021 | 0.000001 | 1191.69946 | 5471.84082 | 2.152414  | 0.00019  | <u>MARCH7</u>              |
| 0.365858 | 0.000034 | 222.19902  | 1033.55933 | 2.150212  | 0.005869 | <u>BCKDK</u>               |
| 0.000001 | 0.       | 4282.57178 | 18697.7656 | 2.1485032 | 0.000168 | <u>TPM2</u>                |
| 0.001037 | 0.000003 | 529.294861 | 2482.07202 | 2.1446218 | 0.000243 | <u>TUFT1</u>               |
| 0.000105 | 0.000001 | 816.476562 | 3790.03613 | 2.1417553 | 0.000214 | <u>LURAP1L</u>             |
| 0.898353 | 0.032166 | 67.078949  | 296.395355 | 2.1407843 | 0.019884 | <u>CASP7</u>               |
| 0.000003 | 0.       | 2501.83521 | 11018.2588 | 2.1387001 | 0.000181 | <u>AJUBA</u>               |
| 0.000007 | 0.000001 | 1662.30017 | 7483.50488 | 2.1383014 | 0.000189 | <u>EEF1B2</u>              |
| 0.00002  | 0.000001 | 1211.61353 | 5506.26074 | 2.1379065 | 0.000199 | <u>TTC1</u>                |
| 0.000001 | 0.       | 4007.96729 | 17305.6641 | 2.1334485 | 0.000178 | <u>PSMA1</u>               |
| 0.000029 | 0.000001 | 1092.12915 | 4966.05615 | 2.1324195 | 0.000208 | <u>KLF10</u>               |
| 0.724246 | 0.000489 | 133.109787 | 598.527405 | 2.1280906 | 0.000732 | <u>TMEM119</u>             |
| 0.881373 | 0.002573 | 101.666534 | 450.329712 | 2.1261646 | 0.001665 | <u>POLB</u>                |
| 0.003455 | 0.000004 | 431.82074  | 2013.57617 | 2.1240719 | 0.000286 | <u>BTF3</u>                |
| 0.994775 | 0.023963 | 71.271385  | 311.693176 | 2.1232991 | 0.002061 | <u>RQCD1</u>               |
| 0.000032 | 0.000001 | 1069.0708  | 4825.50781 | 2.1200137 | 0.000218 | <u>ADAMTS6</u>             |
| 0.649723 | 0.000532 | 141.494659 | 633.903625 | 2.1176869 | 0.001045 | <u>DGKE</u>                |
| 0.000247 | 0.000001 | 811.236023 | 3695.38086 | 2.1144387 | 0.00025  | <u>CUL1</u>                |
| 0.960342 | 0.004819 | 93.281662  | 409.216827 | 2.1135618 | 0.001408 | <u>FLRT3</u>               |
|          |          |            |            |           |          | <u>CYP2B6</u>   <u>CYP</u> |
| 0.750762 | 0.000602 | 129.965469 | 577.492859 | 2.1129074 | 0.000804 | <u>2B7P1</u>               |
| 0.050976 | 0.000016 | 273.556335 | 1253.46558 | 2.1116075 | 0.000391 | <u>MBIP</u>                |
| 0.161872 | 0.000036 | 225.343338 | 1021.12982 | 2.1106666 | 0.000514 | <u>SSNA1</u>               |
|          |          |            |            |           |          | <u>previous</u>            |
|          |          |            |            |           |          | <u>version</u>             |
|          |          |            |            |           |          | <u>conserved</u>           |
| 0.000538 | 0.000002 | 594.277588 | 2710.58325 | 2.1089115 | 0.000266 | <u>probe</u>               |
| 0.930839 | 0.002607 | 102.714638 | 449.373596 | 2.1082915 | 0.001117 | <u>UBB</u>                 |



|          |          |            |            |           |          |                   |
|----------|----------|------------|------------|-----------|----------|-------------------|
|          |          |            |            |           |          | <u>previous</u>   |
|          |          |            |            |           |          | <u>version</u>    |
|          |          |            |            |           |          | <u>conserved</u>  |
| 0.861391 | 0.001271 | 115.291946 | 506.740448 | 2.1071435 | 0.000955 | <u>probe</u>      |
| 0.505967 | 0.000202 | 158.264389 | 705.612183 | 2.1034021 | 0.000658 | <u>ALPK3</u>      |
| 0.585714 | 0.000295 | 147.78331  | 656.850342 | 2.1025839 | 0.000835 | <u>AP3S1</u>      |
|          |          |            |            |           |          | <u>previous</u>   |
|          |          |            |            |           |          | <u>version</u>    |
|          |          |            |            |           |          | <u>conserved</u>  |
| 0.915873 | 0.023191 | 105.858963 | 460.846985 | 2.1004184 | 0.020696 | <u>probe</u>      |
|          |          |            |            |           |          | SUMO1   SUMO      |
| 0.000037 | 0.000001 | 1032.38696 | 4606.55762 | 2.099821  | 0.000236 | <u>1P3</u>        |
| 0.235773 | 0.000065 | 199.140625 | 891.098328 | 2.0979117 | 0.000534 | <u>HIF1A</u>      |
| 0.000002 | 0.       | 3117.07495 | 13222.1016 | 2.0966609 | 0.000207 | <u>IGFBP3</u>     |
| 0.929209 | 0.014898 | 78.608147  | 337.50827  | 2.0925874 | 0.005638 | <u>NAA60</u>      |
| 0.972907 | 0.006359 | 90.137337  | 388.182312 | 2.089653  | 0.001452 | <u>RIPK1</u>      |
| 0.000001 | 0.       | 3412.6416  | 14349.3594 | 2.0880787 | 0.000212 | <u>EIF4G1</u>     |
|          |          |            |            |           |          | <u>LOC1006527</u> |
| 0.961747 | 0.004809 | 94.329773  | 406.34848  | 2.0876615 | 0.001368 | <u>40</u>         |
| 0.46334  | 0.000182 | 163.504944 | 719.953857 | 2.0834403 | 0.000688 | <u>TOP1MT</u>     |
| 0.015484 | 0.000008 | 338.539062 | 1532.65088 | 2.0825619 | 0.000382 | <u>DR1</u>        |
| 0.000655 | 0.000002 | 576.459717 | 2580.55176 | 2.0801336 | 0.000301 | <u>SAT2</u>       |
|          |          |            |            |           |          | <u>previous</u>   |
|          |          |            |            |           |          | <u>version</u>    |
|          |          |            |            |           |          | <u>conserved</u>  |
| 0.930843 | 0.002969 | 102.714638 | 439.812469 | 2.0771658 | 0.00126  | <u>probe</u>      |
| 0.133701 | 0.000032 | 236.872543 | 1050.76929 | 2.0766236 | 0.000568 | <u>DHRS7</u>      |
| 0.181404 | 0.000041 | 224.295242 | 992.446411 | 2.075473  | 0.000065 | <u>PPP2CB</u>     |
| 0.000001 | 0.       | 8943.51074 | 36742.5078 | 2.0746717 | 0.000213 | <u>JUN</u>        |
|          |          |            |            |           |          | TCEAL3   TCE      |
| 0.030502 | 0.000013 | 299.759064 | 1341.42798 | 2.0725319 | 0.000427 | <u>AL4</u>        |
| 0.321761 | 0.000106 | 183.419006 | 803.135803 | 2.0696393 | 0.000645 | <u>IK</u>         |
| 0.964793 | 0.005644 | 93.281662  | 395.831207 | 2.0673171 | 0.001506 | <u>FGD4</u>       |
|          |          |            |            |           |          | <u>previous</u>   |
|          |          |            |            |           |          | <u>version</u>    |
|          |          |            |            |           |          | <u>conserved</u>  |
| 0.000001 | 0.       | 5649.30518 | 23114.0566 | 2.066041  | 0.000224 | <u>probe</u>      |
| 0.212277 | 0.000064 | 204.38118  | 893.966614 | 2.0628272 | 0.000599 | <u>C6orf132</u>   |
| 0.035137 | 0.000015 | 292.422302 | 1297.44678 | 2.0615715 | 0.000453 | <u>DENND1B</u>    |
| 0.000606 | 0.000002 | 581.700256 | 2570.03467 | 2.0610032 | 0.000321 | <u>ZNF317</u>     |
| 0.550334 | 0.000288 | 153.023849 | 661.63092  | 2.0597352 | 0.000082 | <u>PROSC</u>      |
| 0.955184 | 0.004739 | 96.425987  | 407.304596 | 2.0592202 | 0.001479 | <u>ICAM4</u>      |
| 0.000029 | 0.000001 | 1091.08105 | 4726.07178 | 2.0591909 | 0.000272 | <u>SEPW1</u>      |
| 0.964943 | 0.015966 | 79.65625   | 333.683807 | 2.0576318 | 0.00343  | <u>NRIP3</u>      |
| 0.858532 | 0.037577 | 79.65625   | 333.683807 | 2.0576318 | 0.032481 | <u>HDAC7</u>      |
| 0.032353 | 0.000001 | 2306.88696 | 9630.93652 | 2.0528925 | 0.001242 | <u>MYLK</u>       |
| 0.955186 | 0.004877 | 96.425987  | 405.392365 | 2.0526766 | 0.001517 | <u>MED10</u>      |
| 0.006959 | 0.000006 | 384.655853 | 1712.40027 | 2.0524121 | 0.000397 | <u>EWSR1</u>      |
| 0.997739 | 0.043561 | 68.12706   | 281.097534 | 2.0447298 | 0.002722 | <u>DNAL1</u>      |
| 0.015812 | 0.00001  | 335.394745 | 1476.24011 | 2.042511  | 0.000446 | <u>CHAC1</u>      |
| 0.493194 | 0.000228 | 161.408722 | 690.314331 | 2.040709  | 0.012414 | <u>AKT1</u>       |
| 0.000032 | 0.000001 | 1070.1189  | 4575.96191 | 2.0386066 | 0.000296 | <u>HDLBP</u>      |
| 0.01837  | 0.00001  | 327.009888 | 1431.30273 | 2.0358435 | 0.000465 | <u>HMGCL</u>      |
| 0.000172 | 0.000002 | 736.820312 | 3174.29858 | 2.0307481 | 0.000334 | <u>ALKBH1</u>     |
| 0.355525 | 0.000154 | 178.178452 | 759.154541 | 2.030417  | 0.000836 | <u>ABI2</u>       |

|          |          |            |            |           |          |                  |
|----------|----------|------------|------------|-----------|----------|------------------|
| 0.002845 | 0.000007 | 446.494263 | 1952.38489 | 2.0298018 | 0.000552 | <u>STARD10</u>   |
| 0.817176 | 0.001287 | 121.580597 | 506.740448 | 2.0258424 | 0.00124  | <u>NIPBL</u>     |
|          |          |            |            |           |          | SRSF10 LOC       |
| 0.000005 | 0.000001 | 1940.04895 | 8010.32373 | 2.0234711 | 0.000285 | 100996657        |
| 0.994745 | 0.028243 | 74.41571   | 303.088165 | 2.0220865 | 0.002562 | <u>DGCR2</u>     |
| 0.41514  | 0.000186 | 169.793594 | 717.08551  | 2.0196518 | 0.000852 | <u>TIMM44</u>    |
| 0.438654 | 0.000207 | 166.649261 | 702.743835 | 2.018309  | 0.000869 | <u>ATXN1L</u>    |
| 0.001358 | 0.000003 | 508.332672 | 2191.41333 | 2.0162226 | 0.000404 | <u>DPM2</u>      |
| 0.044968 | 0.000019 | 279.845001 | 1199.9231  | 2.0147697 | 0.000561 | <u>CDKL3</u>     |
|          |          |            |            |           |          | SBDS SBDSP       |
| 0.000002 | 0.       | 2893.82788 | 11651.2061 | 2.0146723 | 0.000283 | 1                |
|          |          |            |            |           |          | RPSAP58 RP       |
| 0.       | 0.       | 16456.3535 | 62637.8984 | 2.0136933 | 0.000265 | SA               |
| 0.005119 | 0.000006 | 404.569916 | 1754.46924 | 2.0133029 | 0.00045  | <u>HIST3H2A</u>  |
|          |          |            |            |           |          | <u>previous</u>  |
|          |          |            |            |           |          | <u>version</u>   |
|          |          |            |            |           |          | <u>conserved</u> |
| 0.002867 | 0.000004 | 445.446136 | 1921.78931 | 2.0095284 | 0.000437 | <u>probe</u>     |
| 0.006517 | 0.000006 | 388.848297 | 1681.80457 | 2.0092092 | 0.000467 | <u>CDO1</u>      |
| 0.000002 | 0.       | 3106.59375 | 12429.4824 | 2.0088328 | 0.000288 | <u>LATS2</u>     |
| 0.958541 | 0.00636  | 95.377884  | 388.182312 | 2.0081231 | 0.00184  | <u>PDXDC1</u>    |
| 0.000001 | 0.       | 8267.48047 | 32380.7148 | 2.0078018 | 0.000275 | <u>GPX4</u>      |
| 0.997098 | 0.077493 | 68.12706   | 273.448608 | 2.0063684 | 0.010585 | <u>HAUS1</u>     |
| 0.926112 | 0.003785 | 103.762749 | 422.602417 | 2.004748  | 0.001651 | <u>ETS1</u>      |
| 0.74197  | 0.000877 | 131.013565 | 540.204468 | 2.0040069 | 0.001215 | <u>MSRB1</u>     |
| 0.706101 | 0.000724 | 135.206009 | 558.370605 | 2.003658  | 0.00117  | NA               |
| 0.660499 | 0.000581 | 140.446548 | 580.361206 | 2.0013509 | 0.001126 | <u>IKBIP</u>     |
| 0.060571 | 0.000001 | 833.246338 | 3481.21118 | 1.9912359 | 0.001984 | <u>DUSP16</u>    |
| 0.00047  | 0.000002 | 608.951111 | 2560.47339 | 1.9895816 | 0.000417 | <u>UBXN6</u>     |
|          |          |            |            |           |          | SCNM1 TNFA       |
|          |          |            |            |           |          | IP8L2-           |
| 0.00005  | 0.000001 | 1159.20813 | 4779.61426 | 1.9886158 | 0.000368 | SCNM1            |
| 0.000343 | 0.000002 | 645.634888 | 2706.75879 | 1.9876828 | 0.000412 | <u>ZFY</u>       |
| 0.002833 | 0.000004 | 475.841309 | 2015.4884  | 1.9858914 | 0.000486 | <u>NEDD9</u>     |
|          |          |            |            |           |          | <u>previous</u>  |
|          |          |            |            |           |          | <u>version</u>   |
|          |          |            |            |           |          | <u>conserved</u> |
| 0.005719 | 0.000006 | 397.233154 | 1690.40967 | 1.9849596 | 0.000508 | <u>probe</u>     |
| 0.000018 | 0.000001 | 1238.86438 | 5074.09717 | 1.982625  | 0.000397 | <u>POLR1C</u>    |
|          |          |            |            |           |          | <u>previous</u>  |
|          |          |            |            |           |          | <u>version</u>   |
|          |          |            |            |           |          | <u>conserved</u> |
| 0.817143 | 0.001525 | 121.580597 | 491.442627 | 1.9814778 | 0.00146  | <u>probe</u>     |
| 0.153264 | 0.000061 | 220.102798 | 913.088928 | 1.980561  | 0.000803 | <u>ASGR1</u>     |
|          |          |            |            |           |          | LOC732265        |
|          |          |            |            |           |          | LOC646670        |
|          |          |            |            |           |          | LOC440292        |
| 0.655126 | 0.000664 | 139.398438 | 566.975647 | 1.9790459 | 0.001433 | COMMD4           |
| 0.642048 | 0.000582 | 142.54277  | 580.361206 | 1.9786717 | 0.001212 | <u>FYN</u>       |
|          |          |            |            |           |          | LOC442459        |
| 0.23579  | 0.000096 | 199.140625 | 822.258057 | 1.9784133 | 0.000862 | RCC2             |
| 0.001518 | 0.000004 | 495.755371 | 2084.32861 | 1.9772265 | 0.000474 | <u>PDHA1</u>     |
|          |          |            |            |           |          | UBE2M UBE2       |
| 0.00001  | 0.000001 | 1472.59253 | 5963.2832  | 1.9760648 | 0.000356 | MP1              |

|          |          |            |            |           |          |                  |
|----------|----------|------------|------------|-----------|----------|------------------|
| 0.000014 | 0.000001 | 1329.00171 | 5403.00049 | 1.9757228 | 0.000362 | <u>MRPL19</u>    |
| 0.000098 | 0.000001 | 885.651733 | 3639.92627 | 1.9699309 | 0.000411 | <u>SDF2</u>      |
| 0.55033  | 0.000398 | 153.023849 | 621.474121 | 1.9691155 | 0.00116  | <u>WARS2</u>     |
| 0.614725 | 0.001183 | 127.869247 | 513.433228 | 1.9676323 | 0.014626 | <u>NRG1</u>      |
| 0.000129 | 0.000002 | 781.888977 | 3216.36768 | 1.9665953 | 0.000422 | <u>GZF1</u>      |
|          |          |            |            |           |          | NUTF2 LOC1       |
| 0.000011 | 0.000001 | 1427.52393 | 5735.72803 | 1.9623822 | 0.000377 | 28322            |
| 0.000234 | 0.000002 | 693.8479   | 2854.00049 | 1.9620557 | 0.000445 | <u>MAP2K3</u>    |
| 0.000037 | 0.000001 | 1032.38696 | 4202.12109 | 1.9617241 | 0.000401 | <u>SSU72</u>     |
| 0.027779 | 0.000028 | 311.288239 | 1290.75403 | 1.9606638 | 0.001002 | <u>IL12A</u>     |
| 0.000151 | 0.000002 | 756.734375 | 3101.63403 | 1.9601767 | 0.000437 | NA               |
| 0.893552 | 0.003173 | 110.051399 | 435.031891 | 1.9575304 | 0.001837 | <u>STRN3</u>     |
| 0.995396 | 0.040342 | 73.3676    | 284.921997 | 1.9566053 | 0.003385 | <u>INMT</u>      |
| 0.767919 | 0.001244 | 127.869247 | 508.652679 | 1.9540935 | 0.001528 | <u>ZBTB8OS</u>   |
| 0.000003 | 0.000001 | 2322.60864 | 9056.3125  | 1.9533898 | 0.000369 | <u>ZNF207</u>    |
| 0.955186 | 0.007641 | 96.425987  | 376.708923 | 1.9506373 | 0.002276 | <u>PDLIM7</u>    |
| 0.728271 | 0.006264 | 99.570313  | 389.138428 | 1.949483  | 0.027951 | <u>HAUS2</u>     |
| 0.000003 | 0.000001 | 2471.43994 | 9571.6582  | 1.9482253 | 0.000372 | <u>HSPB8</u>     |
| 0.971498 | 0.012174 | 90.137337  | 348.981628 | 1.9416248 | 0.002659 | <u>GCDH</u>      |
| 0.000498 | 0.000003 | 602.662415 | 2452.43262 | 1.9399492 | 0.00051  | <u>PEPD</u>      |
| 0.005201 | 0.000007 | 403.52179  | 1664.5946  | 1.9389922 | 0.000606 | <u>ILKAP</u>     |
| 0.666724 | 0.001034 | 133.109787 | 524.906616 | 1.9381311 | 0.002795 | <u>TIMMDC1</u>   |
| 0.023586 | 0.000015 | 313.38446  | 1278.32446 | 1.9366974 | 0.00071  | <u>MBOAT7</u>    |
| 0.143016 | 0.000046 | 238.96875  | 963.762939 | 1.9346391 | 0.001091 | <u>ARV1</u>      |
| 0.035603 | 0.00002  | 293.470398 | 1189.40588 | 1.931025  | 0.000766 | <u>GCLM</u>      |
| 0.004067 | 0.000006 | 420.291534 | 1723.87366 | 1.930367  | 0.000615 | <u>UGP2</u>      |
| 0.006454 | 0.000005 | 466.408325 | 1904.57922 | 1.9299259 | 0.000686 | <u>ARPC5</u>     |
| 0.831575 | 0.00406  | 107.955185 | 417.821838 | 1.929144  | 0.003908 | <u>CA2</u>       |
| 0.000928 | 0.000003 | 539.77594  | 2188.54517 | 1.9279496 | 0.000557 | <u>CNBP</u>      |
| 0.067173 | 0.000033 | 259.930939 | 1045.03271 | 1.9259359 | 0.000845 | <u>TRIM56</u>    |
| 0.069732 | 0.000017 | 308.143921 | 1246.77271 | 1.9259189 | 0.001093 | <u>NRXN3</u>     |
| 0.004006 | 0.000007 | 421.339661 | 1721.00525 | 1.9242913 | 0.000702 | <u>HSPA14</u>    |
|          |          |            |            |           |          | previous         |
|          |          |            |            |           |          | version          |
|          |          |            |            |           |          | conserved        |
| 0.000778 | 0.000003 | 556.545654 | 2247.82422 | 1.9239729 | 0.00056  | probe            |
| 0.926053 | 0.0054   | 103.762749 | 398.699554 | 1.9237337 | 0.002285 | <u>TBCE</u>      |
| 0.106374 | 0.000001 | 1608.84668 | 6269.23975 | 1.923529  | 0.007999 | <u>RPS4X</u>     |
| 0.056647 | 0.000029 | 268.315796 | 1076.58447 | 1.9214753 | 0.000841 | <u>E2F4</u>      |
| 0.092824 | 0.000044 | 244.209305 | 976.192444 | 1.9203962 | 0.000907 | <u>SMAD3</u>     |
| 0.006506 | 0.000008 | 388.848297 | 1578.54431 | 1.9179325 | 0.000673 | <u>CAPZB</u>     |
| 0.660522 | 0.000807 | 140.446548 | 547.853333 | 1.9179246 | 0.001575 | <u>ZBTB1</u>     |
| 0.997693 | 0.073162 | 68.12706   | 256.238556 | 1.9175208 | 0.004622 | <u>LRIG2</u>     |
| 0.000001 | 0.       | 3585.57935 | 13425.7539 | 1.9166668 | 0.00041  | <u>HSP90AA1</u>  |
| 0.000003 | 0.000001 | 2375.01392 | 9017.11133 | 1.9160715 | 0.000424 | <u>CLK1</u>      |
| 0.601381 | 0.000627 | 146.735199 | 572.712341 | 1.9150959 | 0.001597 | <u>FAM221A</u>   |
| 0.103487 | 0.000049 | 238.96875  | 950.37738  | 1.9138515 | 0.000948 | <u>TMEM217</u>   |
| 0.000016 | 0.000001 | 1286.02917 | 5023.42334 | 1.913498  | 0.000466 | <u>HNRNPR</u>    |
| 0.996645 | 0.073032 | 69.175163  | 259.106903 | 1.9105315 | 0.005807 | <u>NUP35</u>     |
| 0.221224 | 0.000113 | 202.284958 | 798.355225 | 1.9105258 | 0.001134 | <u>CCNC</u>      |
| 0.173542 | 0.000016 | 317.576904 | 1272.58777 | 1.9103547 | 0.003552 | <u>BLZF1</u>     |
| 0.000309 | 0.000002 | 658.212158 | 2616.88428 | 1.9103466 | 0.000557 | <u>POLG2</u>     |
| 0.000056 | 0.000001 | 935.960938 | 3681.99512 | 1.909135  | 0.000507 | <u>TNFRSF10B</u> |
| 0.       | 0.       | 10738.9209 | 39217.8867 | 1.9076587 | 0.000404 | <u>SERTAD2</u>   |

|          |          |            |            |           |          |                  |
|----------|----------|------------|------------|-----------|----------|------------------|
| 0.153248 | 0.000073 | 220.102798 | 869.107666 | 1.9071885 | 0.001043 | <u>ACOT2</u>     |
| 0.004129 | 0.000006 | 419.243439 | 1690.40967 | 1.9046018 | 0.000683 | <u>RTN3</u>      |
| 0.642037 | 0.000783 | 142.54277  | 550.72168  | 1.9028031 | 0.001647 | NA               |
| 0.000005 | 0.000001 | 1820.56458 | 6934.69531 | 1.9005621 | 0.000466 | <u>H2AFZ</u>     |
| 0.000001 | 0.       | 4960.69775 | 18098.2832 | 1.899783  | 0.000429 | <u>YWHAG</u>     |
| 0.011407 | 0.000011 | 354.260712 | 1415.04883 | 1.8997436 | 0.000765 | <u>STUB1</u>     |
| 0.854418 | 0.002855 | 116.34005  | 442.680817 | 1.8976893 | 0.002166 | <u>BCAS2</u>     |
| 0.0005   | 0.000003 | 602.662415 | 2383.59229 | 1.8973123 | 0.000614 | <u>RASSF8</u>    |
| 0.917833 | 0.005729 | 104.81086  | 394.875092 | 1.8958317 | 0.00259  | <u>CDC42BPA</u>  |
| 0.647473 | 0.00305  | 115.291946 | 437.900238 | 1.8958281 | 0.035299 | <u>CHRNA10</u>   |
|          |          |            |            |           |          | CTAGE11P L       |
|          |          |            |            |           |          | OC10106069       |
|          |          |            |            |           |          | 6 CTAGE4 C       |
| 0.578546 | 0.000621 | 148.831421 | 573.668457 | 1.8957958 | 0.001877 | TAGE9            |
| 0.50597  | 0.000441 | 158.264389 | 610.000793 | 1.8905994 | 0.001539 | <u>MYLIP</u>     |
| 0.992307 | 0.038109 | 77.560036  | 287.790344 | 1.8903638 | 0.004023 | <u>UNC13D</u>    |
|          |          |            |            |           |          | HIST2H2BF        |
|          |          |            |            |           |          | HIST1H2BN        |
|          |          |            |            |           |          | HIST1H2BE        |
|          |          |            |            |           |          | HIST1H2BK        |
|          |          |            |            |           |          | HIST1H2BL        |
|          |          |            |            |           |          | HIST2H2BC        |
|          |          |            |            |           |          | HIST1H2BI        |
|          |          |            |            |           |          | HIST2H2BA        |
|          |          |            |            |           |          | HIST1H2BC        |
|          |          |            |            |           |          | HIST1H2BJ        |
|          |          |            |            |           |          | HIST1H2BD        |
|          |          |            |            |           |          | HIST3H2BB        |
|          |          |            |            |           |          | HIST1H2BO        |
|          |          |            |            |           |          | HIST1H2BH        |
| 0.953331 | 0.010669 | 95.377884  | 356.630554 | 1.8902428 | 0.003122 | HIST1H2BM        |
|          |          |            |            |           |          | <u>previous</u>  |
|          |          |            |            |           |          | <u>version</u>   |
|          |          |            |            |           |          | <u>conserved</u> |
| 0.035146 | 0.000023 | 292.422302 | 1151.16138 | 1.889311  | 0.000902 | <u>probe</u>     |
|          |          |            |            |           |          | CHORDC1 LO       |
| 0.303756 | 0.000128 | 199.140625 | 773.496277 | 1.887551  | 0.002154 | C727896          |
| 0.000257 | 0.000002 | 682.318665 | 2663.73364 | 1.8864036 | 0.000608 | <u>MAX</u>       |
| 0.768007 | 0.001654 | 127.869247 | 484.749817 | 1.8844319 | 0.002024 | <u>DDX27</u>     |
| 0.00001  | 0.000001 | 1534.43091 | 5831.33984 | 1.8829019 | 0.000514 | <u>RALY</u>      |
| 0.015522 | 0.000014 | 336.442841 | 1323.26184 | 1.8803152 | 0.000854 | <u>FGF2</u>      |
| 0.044968 | 0.000028 | 279.845001 | 1092.83838 | 1.8801618 | 0.000966 | <u>DRG2</u>      |
| 0.000588 | 0.000003 | 584.844604 | 2285.11255 | 1.8772856 | 0.000667 | <u>CHKA</u>      |
|          |          |            |            |           |          | <u>previous</u>  |
|          |          |            |            |           |          | <u>version</u>   |
|          |          |            |            |           |          | <u>conserved</u> |
| 0.000003 | 0.000001 | 2264.96265 | 8390.85742 | 1.8765229 | 0.0005   | <u>probe</u>     |
| 0.160082 | 0.00013  | 218.006592 | 840.424255 | 1.871993  | 0.001628 | <u>SPSB3</u>     |
| 0.021839 | 0.000017 | 318.625    | 1242.94824 | 1.8714942 | 0.000921 | <u>MAPKAP1</u>   |
| 0.001033 | 0.000004 | 530.342957 | 2069.98682 | 1.8698995 | 0.000711 | <u>LIMS1</u>     |
| 0.353563 | 0.00023  | 180.274673 | 688.4021   | 1.8670613 | 0.001659 | <u>MTRNR2L3</u>  |
| 0.000043 | 0.000001 | 992.558838 | 3780.47485 | 1.8649001 | 0.000599 | <u>ZRANB1</u>    |
| 0.009821 | 0.000011 | 363.693665 | 1416.00488 | 1.8614325 | 0.000889 | <u>SERPINB8</u>  |
| 0.78487  | 0.002028 | 125.773026 | 468.49588  | 1.8603746 | 0.00228  | <u>PKP2</u>      |

|          |          |            |            |           |          |                  |
|----------|----------|------------|------------|-----------|----------|------------------|
| 0.053197 | 0.000006 | 452.782898 | 1766.8988  | 1.860197  | 0.001963 | <u>LRRC41</u>    |
| 0.000024 | 0.000001 | 1144.53455 | 4333.10889 | 1.859285  | 0.000594 | <u>HEXIM1</u>    |
| 0.568059 | 0.000664 | 150.927643 | 566.975647 | 1.8574012 | 0.001872 | <u>RAB8B</u>     |
| 0.856585 | 0.004351 | 112.147621 | 413.04126  | 1.8548186 | 0.00324  | <u>AP1S3</u>     |
| 0.000001 | 0.       | 4309.82227 | 15365.709  | 1.8547198 | 0.000519 | <u>RSRC2</u>     |
| 0.000005 | 0.000001 | 1835.23816 | 6769.2876  | 1.854073  | 0.000562 | <u>KLHL5</u>     |
| 0.005173 | 0.000008 | 407.714233 | 1586.19324 | 1.8540698 | 0.000861 | <u>TGS1</u>      |
| 0.980351 | 0.023959 | 85.944901  | 311.693176 | 1.8532101 | 0.004067 | <u>CWF19L1</u>   |
| 0.99587  | 0.066918 | 72.319489  | 260.063019 | 1.8513766 | 0.005271 | <u>C11orf91</u>  |
| 0.042255 | 0.000029 | 282.989319 | 1083.27722 | 1.8508053 | 0.001088 | <u>EXOSC7</u>    |
| 0.010545 | 0.000012 | 359.501251 | 1386.36536 | 1.8483034 | 0.000939 | <u>AKIRIN1</u>   |
| 0.001137 | 0.000004 | 520.909973 | 2004.01501 | 1.8472045 | 0.000787 | <u>LOC441155</u> |
| 0.000159 | 0.000002 | 748.349548 | 2835.83423 | 1.8470884 | 0.000694 | <u>FBXW7</u>     |
| 0.134456 | 0.000078 | 226.391449 | 857.634277 | 1.8442067 | 0.00132  | <u>CCDC93</u>    |
| 0.000002 | 0.000001 | 2651.7146  | 9531.50098 | 1.8439275 | 0.000563 | <u>SLC7A11</u>   |
| 0.000002 | 0.000001 | 2794.25757 | 10031.5488 | 1.8429197 | 0.000563 | <u>ID2</u>       |
| 0.007302 | 0.00001  | 381.511536 | 1468.59119 | 1.8424411 | 0.000929 | <u>EIF2AK1</u>   |
| 0.443817 | 0.000244 | 181.322784 | 680.753235 | 1.8415586 | 0.02613  | <u>SNX16</u>     |
| 0.000019 | 0.000001 | 1216.854   | 4541.54199 | 1.8414982 | 0.000632 | <u>SERTAD1</u>   |
| 0.757927 | 0.005245 | 110.051399 | 400.611786 | 1.8412161 | 0.010957 | <u>VPS53</u>     |
| 0.001393 | 0.000004 | 503.092102 | 1925.61365 | 1.8374926 | 0.000831 | <u>RIT1</u>      |
| 0.50597  | 0.00054  | 158.264389 | 588.010132 | 1.8374608 | 0.001913 | <u>TSC22D1</u>   |
| 0.000003 | 0.000001 | 2479.82495 | 8891.86035 | 1.835656  | 0.000586 | <u>SRSF6</u>     |
| 0.362601 | 0.000286 | 177.130356 | 660.674805 | 1.8334568 | 0.001728 | <u>PMP22</u>     |
| 0.001073 | 0.000004 | 526.150513 | 1997.32227 | 1.8277992 | 0.000849 | <u>FUNDC2</u>    |
| 0.935384 | 0.009375 | 101.666534 | 364.279449 | 1.8276327 | 0.003468 | <u>QKI</u>       |
| 0.079249 | 0.000049 | 252.594162 | 949.421265 | 1.8272621 | 0.001307 | <u>OR10AG1</u>   |
| 0.182317 | 0.000114 | 211.717926 | 790.706299 | 1.8262758 | 0.001507 | <u>DCTN6</u>     |
|          |          |            |            |           |          | SNRPN   SNUR     |
| 0.000462 | 0.000003 | 611.047302 | 2303.27881 | 1.826114  | 0.000809 | F                |
| 0.000001 | 0.       | 9414.11133 | 32373.0664 | 1.8228856 | 0.000574 | <u>OR111</u>     |
| 0.000022 | 0.000001 | 1168.64111 | 4308.25    | 1.8204902 | 0.000695 | <u>GGNBP2</u>    |
| 0.038441 | 0.00001  | 378.367188 | 1433.21497 | 1.8197013 | 0.001618 | <u>MYOM2</u>     |
| 0.930839 | 0.009229 | 102.714638 | 365.235565 | 1.8164806 | 0.00358  | <u>C8orf33</u>   |
| 0.793132 | 0.002575 | 124.724922 | 450.329712 | 1.8159486 | 0.002766 | <u>NRCAM</u>     |
| 0.00098  | 0.000004 | 534.5354   | 2010.70789 | 1.8150645 | 0.00089  | <u>SMNDC1</u>    |
|          |          |            |            |           |          | SEC14L1   SE     |
| 0.559364 | 0.000753 | 151.975739 | 554.546143 | 1.8147263 | 0.002199 | C14LIP1          |
| 0.975323 | 0.026246 | 86.993012  | 306.912598 | 1.8142305 | 0.004926 | <u>CNOT4</u>     |
| 0.958584 | 0.018082 | 95.377884  | 337.50827  | 1.8136112 | 0.005444 | <u>EIF4E</u>     |
| 0.256621 | 0.000183 | 194.948196 | 719.953857 | 1.8135852 | 0.001714 | <u>POLR3B</u>    |
| 0.994482 | 0.127132 | 66.030838  | 229.467377 | 1.813547  | 0.009801 | <u>ADAT1</u>     |
| 0.943834 | 0.011581 | 99.570313  | 351.849976 | 1.8094163 | 0.003846 | <u>PIK3CA</u>    |
| 0.002149 | 0.000006 | 467.456421 | 1760.20593 | 1.8086477 | 0.00097  | <u>ARPC2</u>     |
| 0.003779 | 0.000007 | 440.205597 | 1657.90173 | 1.8061479 | 0.001034 | <u>C11orf91</u>  |
| 0.678893 | 0.001391 | 138.350327 | 499.091522 | 1.8060311 | 0.002539 | <u>GUSBP2</u>    |
| 0.442046 | 0.000405 | 169.793594 | 619.56189  | 1.8053852 | 0.004134 | <u>LTV1</u>      |
|          |          |            |            |           |          | LOC653375        |
| 0.614328 | 0.001252 | 145.687088 | 526.818848 | 1.8051818 | 0.002901 | WBSCR16          |
| 0.000055 | 0.000001 | 940.153381 | 3438.18604 | 1.8044839 | 0.00078  | <u>SDHAF2</u>    |
|          |          |            |            |           |          | previous         |
|          |          |            |            |           |          | version          |
|          |          |            |            |           |          | conserved        |
| 0.145783 | 0.000002 | 693.8479   | 2560.47339 | 1.8037534 | 0.014737 | <u>probe</u>     |

|          |          |            |            |           |          |                  |
|----------|----------|------------|------------|-----------|----------|------------------|
| 0.000006 | 0.000001 | 1748.24512 | 6246.29297 | 1.8008285 | 0.000706 | <u>SIRT1</u>     |
| 0.523527 | 0.00068  | 156.168182 | 565.063416 | 1.8002605 | 0.002276 | <u>WDR18</u>     |
| 0.137421 | 0.000102 | 225.343338 | 827.994751 | 1.7990533 | 0.001722 | <u>GNG12</u>     |
| 0.014697 | 0.000012 | 376.270966 | 1400.70703 | 1.7949687 | 0.001345 | <u>MRPS9</u>     |
| 0.714871 | 0.001798 | 134.157898 | 478.057037 | 1.7908174 | 0.002816 | <u>COMMD3</u>    |
| 0.000002 | 0.       | 3338.22583 | 11520.2178 | 1.7906928 | 0.000689 | <u>OSTC</u>      |
| 0.001164 | 0.000005 | 518.813721 | 1919.87708 | 1.7887722 | 0.001007 | <u>PLEKHB2</u>   |
| 0.230819 | 0.000173 | 200.188736 | 727.602783 | 1.7885857 | 0.001855 | <u>POLG</u>      |
| 0.874809 | 0.00548  | 113.195724 | 397.743439 | 1.7881002 | 0.003517 | <u>BMP1</u>      |
| 0.000044 | 0.000001 | 989.41449  | 3572.04199 | 1.7878865 | 0.000827 | <u>SLC39A7</u>   |
| 0.005049 | 0.000009 | 405.618011 | 1505.87964 | 1.7869547 | 0.001136 | <u>MB21D2</u>    |
| 0.103503 | 0.000132 | 238.96875  | 867.195435 | 1.7777151 | 0.002427 | <u>SENP5</u>     |
|          |          |            |            |           |          | <u>previous</u>  |
|          |          |            |            |           |          | <u>version</u>   |
|          |          |            |            |           |          | <u>conserved</u> |
| 0.000003 | 0.000001 | 2223.03833 | 7699.58643 | 1.7765657 | 0.00076  | <u>probe</u>     |
| 0.000001 | 0.       | 6762.39648 | 22454.3379 | 1.7762117 | 0.000705 | <u>GPNMB</u>     |
| 0.88461  | 0.010328 | 103.762749 | 358.542755 | 1.7761167 | 0.005978 | <u>IPO9</u>      |
| 0.000112 | 0.000002 | 803.899292 | 2893.20117 | 1.7756718 | 0.000918 | <u>SMARCA4</u>   |
| 0.961792 | 0.018998 | 94.329773  | 324.12265  | 1.7732817 | 0.004801 | <u>RBCK1</u>     |
| 0.823145 | 0.005267 | 120.532486 | 421.646301 | 1.7731134 | 0.004931 | <u>SLC4A1AP</u>  |
| 0.000095 | 0.000002 | 832.198181 | 2969.69019 | 1.764745  | 0.000953 | <u>CGRRF1</u>    |
| 0.019079 | 0.000019 | 332.250427 | 1204.70374 | 1.763895  | 0.001448 | <u>ECHDC2</u>    |
| 0.000638 | 0.000006 | 576.459717 | 2086.24097 | 1.7617011 | 0.001418 | <u>USP36</u>     |
| 0.047939 | 0.00004  | 276.700653 | 995.314758 | 1.7595124 | 0.001616 | <u>ENTPD4</u>    |
| 0.996497 | 0.103925 | 71.271385  | 239.028519 | 1.7585075 | 0.007729 | <u>ELFN2</u>     |
|          |          |            |            |           |          | <u>previous</u>  |
|          |          |            |            |           |          | <u>version</u>   |
|          |          |            |            |           |          | <u>conserved</u> |
| 0.020983 | 0.000016 | 350.068268 | 1265.89502 | 1.7571486 | 0.001591 | <u>probe</u>     |
| 0.00001  | 0.000001 | 1471.54443 | 5145.80566 | 1.7549851 | 0.000879 | <u>NINJ1</u>     |
| 0.186294 | 0.000149 | 210.66983  | 749.593445 | 1.7545301 | 0.002047 | <u>STK11</u>     |
| 0.043147 | 0.000038 | 281.941193 | 1010.61255 | 1.7541352 | 0.001632 | <u>FKBP10</u>    |
|          |          |            |            |           |          | <u>previous</u>  |
|          |          |            |            |           |          | <u>version</u>   |
|          |          |            |            |           |          | <u>conserved</u> |
| 0.861385 | 0.005644 | 115.291946 | 395.831207 | 1.7533096 | 0.003962 | <u>probe</u>     |
| 0.801274 | 0.003534 | 123.676811 | 427.382996 | 1.7531741 | 0.003618 | <u>EXOSC10</u>   |
| 0.997374 | 0.124579 | 69.175163  | 230.423492 | 1.7520495 | 0.008302 | <u>GALR2</u>     |
| 0.839977 | 0.00474  | 118.436272 | 407.304596 | 1.7518511 | 0.003847 | <u>ANKRD1</u>    |
| 0.070103 | 0.000056 | 257.834717 | 920.737854 | 1.7501552 | 0.001769 | <u>FAM24B</u>    |
|          |          |            |            |           |          | LOC1010605       |
| 0.431256 | 0.00054  | 167.697372 | 588.010132 | 1.7488009 | 0.002642 | 55 POLR3GL       |
| 0.595888 | 0.001164 | 147.78331  | 514.389343 | 1.7487571 | 0.002988 | <u>SRP19</u>     |
| 0.000009 | 0.000001 | 1542.8158  | 5359.01904 | 1.7477819 | 0.0009   | <u>ZFAND2A</u>   |
| 0.000798 | 0.000004 | 556.545654 | 1996.36609 | 1.7463157 | 0.001176 | <u>BACH1</u>     |
| 0.225969 | 0.000195 | 201.236847 | 710.392761 | 1.7449945 | 0.00222  | <u>PSMG2</u>     |
| 0.586709 | 0.001152 | 148.831421 | 515.345459 | 1.7406261 | 0.003067 | <u>KAT8</u>      |
| 0.939729 | 0.014752 | 100.618423 | 338.464386 | 1.7403768 | 0.005075 | <u>ALG14</u>     |
| 0.045923 | 0.000041 | 278.796875 | 989.578064 | 1.7396389 | 0.00175  | <u>PTPN21</u>    |
| 0.000034 | 0.000001 | 1050.20483 | 3655.22412 | 1.7374411 | 0.001011 | <u>GPS1</u>      |
| 0.164034 | 0.000136 | 216.958481 | 762.979004 | 1.7356992 | 0.002167 | <u>NEK7</u>      |
| 0.003888 | 0.000009 | 423.435852 | 1515.4408  | 1.7326264 | 0.001401 | <u>DCAF6</u>     |
| 0.000001 | 0.       | 5872.55225 | 18936.7949 | 1.731062  | 0.00086  | <u>MMADHC</u>    |

|          |          |            |            |           |          |                  |
|----------|----------|------------|------------|-----------|----------|------------------|
| 0.000878 | 0.000004 | 545.016479 | 1935.1748  | 1.7298006 | 0.00127  | <u>SRF</u>       |
| 0.418211 | 0.000452 | 175.034134 | 607.132446 | 1.7294083 | 0.005914 | <u>SLC30A5</u>   |
| 0.000185 | 0.000002 | 743.109009 | 2595.84961 | 1.7283381 | 0.001161 | <u>PDHX</u>      |
| 0.000428 | 0.000003 | 619.43219  | 2184.7207  | 1.7273768 | 0.001224 | <u>CRCP</u>      |
| 0.328326 | 0.000288 | 189.707657 | 659.718689 | 1.7260924 | 0.003811 | <u>ZNF544</u>    |
| 0.750769 | 0.002892 | 129.965469 | 441.724701 | 1.7250204 | 0.003829 | <u>LY6G5B</u>    |
|          |          |            |            |           |          | LOC1010603       |
|          |          |            |            |           |          | 01 LOC6493       |
|          |          |            |            |           |          | 30 LOC4405       |
|          |          |            |            |           |          | 63 HNRNPCL       |
| 0.000104 | 0.000002 | 816.476562 | 2834.87817 | 1.7247032 | 0.001137 | 1                |
| 0.019822 | 0.000024 | 322.817444 | 1137.77576 | 1.7246434 | 0.001692 | <u>HMG20B</u>    |
| 0.847265 | 0.005729 | 117.388161 | 394.875092 | 1.722364  | 0.004399 | <u>GBGT1</u>     |
| 0.041401 | 0.00004  | 284.037415 | 996.270874 | 1.7218191 | 0.001864 | <u>CBY1</u>      |
| 0.682666 | 0.004808 | 120.532486 | 406.34848  | 1.7217262 | 0.020301 | <u>SLC41A3</u>   |
| 0.000002 | 0.       | 7130.28271 | 22772.7246 | 1.7208128 | 0.000938 | <u>TFB2M</u>     |
| 0.182329 | 0.000163 | 211.717926 | 736.207825 | 1.7201337 | 0.002359 | <u>ELP5</u>      |
| 0.001518 | 0.000006 | 495.755371 | 1754.46924 | 1.7192326 | 0.001381 | <u>UBR2</u>      |
| 0.000011 | 0.000001 | 1477.83313 | 5043.50146 | 1.7185701 | 0.001032 | <u>MED30</u>     |
| 0.000028 | 0.000001 | 1102.61023 | 3787.16772 | 1.7179873 | 0.001088 | <u>TFPI2</u>     |
| 0.001034 | 0.000005 | 530.342957 | 1870.15906 | 1.7178727 | 0.001353 | <u>ANKRD13A</u>  |
| 0.93527  | 0.015158 | 101.666534 | 336.552155 | 1.7175484 | 0.005443 | <u>CP</u>        |
| 0.000034 | 0.000001 | 1066.97449 | 3660.00464 | 1.7164201 | 0.001108 | <u>ID2</u>       |
| 0.000052 | 0.000002 | 952.730713 | 3275.64673 | 1.7163354 | 0.001134 | <u>LINC00674</u> |
| 0.012258 | 0.000018 | 350.068268 | 1229.56262 | 1.7152149 | 0.001677 | <u>GLIPR1</u>    |
| 0.000087 | 0.000002 | 865.737671 | 2978.29517 | 1.7136206 | 0.001183 | <u>TAB2</u>      |
| 0.000251 | 0.000003 | 684.414917 | 2377.85571 | 1.7120986 | 0.001265 | <u>JMJD1C</u>    |
| 0.000012 | 0.000001 | 1392.93628 | 4741.36963 | 1.7110246 | 0.001073 | <u>ASCC3</u>     |
| 0.000258 | 0.000003 | 681.270569 | 2365.42627 | 1.7106929 | 0.001275 | <u>TMEM208</u>   |
| 0.023149 | 0.000027 | 314.432587 | 1095.70667 | 1.7097324 | 0.001836 | <u>TMEM99</u>    |
| 0.000722 | 0.000013 | 563.882385 | 1968.63879 | 1.7065369 | 0.002425 | <u>TRIM58</u>    |
| 0.000087 | 0.000002 | 848.967957 | 2907.54272 | 1.7064565 | 0.001218 | <u>PATL1</u>     |
| 0.881219 | 0.03243  | 112.147621 | 370.97226  | 1.7054494 | 0.027803 | <u>RNF121</u>    |
| 0.89431  | 0.010161 | 109.003296 | 359.498871 | 1.705298  | 0.005416 | <u>LECT1</u>     |
| 0.662372 | 0.002211 | 137.302231 | 461.803101 | 1.705289  | 0.00511  | <u>MARCH5</u>    |
| 0.00383  | 0.000009 | 424.483978 | 1490.58179 | 1.7052544 | 0.001576 | <u>PAWR</u>      |
| 0.99598  | 0.117275 | 72.319489  | 233.291824 | 1.7046307 | 0.009324 | <u>IFT20</u>     |
| 0.001463 | 0.000006 | 498.899689 | 1747.77649 | 1.7044167 | 0.001469 | <u>THYN1</u>     |
| 0.053167 | 0.000052 | 271.460114 | 939.860107 | 1.7028901 | 0.002087 | <u>ZKSCAN1</u>   |
| 0.48869  | 0.000849 | 160.360611 | 543.072754 | 1.7022574 | 0.003333 | <u>PPP4R2</u>    |
| 0.930753 | 0.01542  | 102.714638 | 335.596039 | 1.6987956 | 0.005797 | <u>C10orf137</u> |
| 0.328306 | 0.000401 | 182.370895 | 620.518005 | 1.697959  | 0.002973 | <u>PHLDA3</u>    |
| 0.002066 | 0.000007 | 470.600739 | 1643.56006 | 1.6976176 | 0.001556 | <u>TMEM141</u>   |
| 0.98347  | 0.052864 | 83.848686  | 271.536377 | 1.69705   | 0.007962 | <u>RGMB</u>      |
| 0.363447 | 0.000435 | 180.274673 | 611.912964 | 1.6954889 | 0.003892 | <u>NR2C2</u>     |
|          |          |            |            |           |          | HIST1H2BH        |
|          |          |            |            |           |          | HIST1H2BL        |
|          |          |            |            |           |          | HIST1H2BE        |
|          |          |            |            |           |          | HIST1H2BK        |
|          |          |            |            |           |          | HIST2H2BF        |
|          |          |            |            |           |          | HIST1H2BN        |
|          |          |            |            |           |          | HIST1H2BM        |
|          |          |            |            |           |          | HIST2H2BC        |
| 0.559371 | 0.001216 | 151.975739 | 510.564911 | 1.6951337 | 0.00363  | HIST2H2BA        |

|          |          |            |            |           |          |                  |
|----------|----------|------------|------------|-----------|----------|------------------|
| 0.586424 | 0.001391 | 148.831421 | 499.091522 | 1.6942435 | 0.003747 | <u>SNAPC5</u>    |
| 0.000099 | 0.000002 | 825.909546 | 2799.50195 | 1.6905963 | 0.001315 | <u>BRF2</u>      |
| 0.125249 | 0.000058 | 267.2677   | 916.913391 | 1.689419  | 0.003707 | <u>COQ3</u>      |
| 0.001233 | 0.000001 | 982.077759 | 3311.02295 | 1.6893172 | 0.001782 | <u>CCRN4L</u>    |
| 0.005651 | 0.000012 | 400.377472 | 1387.32153 | 1.6883123 | 0.001758 | <u>DLG1</u>      |
| 0.447141 | 0.000738 | 165.601151 | 556.458374 | 1.6882709 | 0.003447 | <u>SMTN</u>      |
| 0.000238 | 0.000003 | 691.751648 | 2361.60181 | 1.6869091 | 0.001407 | <u>PABPC4</u>    |
| 0.002729 | 0.000008 | 449.63858  | 1558.46594 | 1.6865931 | 0.001664 | <u>JMJD6</u>     |
| 0.976777 | 0.041914 | 88.041122  | 283.009766 | 1.6842071 | 0.007668 | <u>SCN8A</u>     |
| 0.926055 | 0.015417 | 103.762749 | 335.596039 | 1.6841487 | 0.006071 | <u>CNRIP1</u>    |
| 0.887522 | 0.009843 | 111.09951  | 361.411102 | 1.6835155 | 0.005558 | <u>MFSD5</u>     |
| 0.021822 | 0.000028 | 317.576904 | 1087.10168 | 1.6835042 | 0.002044 | <u>CAPN7</u>     |
| 0.007298 | 0.000014 | 381.511536 | 1314.65686 | 1.6829954 | 0.001837 | <u>LETMD1</u>    |
| 0.012032 | 0.000019 | 351.116364 | 1205.65979 | 1.682477  | 0.00193  | <u>IFRD1</u>     |
| 0.000028 | 0.000001 | 1126.71667 | 3769.95776 | 1.6801851 | 0.001282 | <u>SRM</u>       |
| 0.001812 | 0.000007 | 481.081848 | 1657.90173 | 1.678451  | 0.001704 | <u>EZH2</u>      |
| 0.037348 | 0.000042 | 289.277954 | 984.797485 | 1.6772735 | 0.002232 | <u>WDR83</u>     |
|          |          |            |            |           |          | ARL17B LOC       |
|          |          |            |            |           |          | 100996709        |
| 0.875598 | 0.026834 | 95.377884  | 305.956482 | 1.6771365 | 0.017224 | ARL17A           |
| 0.099094 | 0.000097 | 241.064972 | 817.477539 | 1.6765605 | 0.002556 | <u>ADAMTS5</u>   |
| 0.000215 | 0.000003 | 705.377075 | 2387.41675 | 1.6758996 | 0.001519 | <u>LXN</u>       |
| 0.000008 | 0.000001 | 1619.32776 | 5346.58984 | 1.6743233 | 0.001229 | <u>ID2</u>       |
| 0.000001 | 0.       | 3610.73413 | 11499.1836 | 1.6742354 | 0.001131 | <u>ATP6V0D1</u>  |
| 0.005201 | 0.000012 | 403.52179  | 1384.45312 | 1.6736382 | 0.001856 | <u>VEGFA</u>     |
| 0.019425 | 0.000026 | 325.961761 | 1109.09229 | 1.6733861 | 0.00212  | <u>HPX</u>       |
| 0.000056 | 0.000002 | 935.960938 | 3123.62451 | 1.6729293 | 0.001375 | <u>DDX47</u>     |
| 0.000722 | 0.000004 | 563.882385 | 1924.65759 | 1.6727014 | 0.001607 | <u>CLIP4</u>     |
| 0.000005 | 0.000001 | 1838.38245 | 6006.30859 | 1.6720363 | 0.00122  | <u>PSMB2</u>     |
| 0.674565 | 0.002541 | 137.302231 | 451.285828 | 1.6719468 | 0.005117 | <u>ARMC8</u>     |
| 0.592787 | 0.001597 | 147.78331  | 487.618164 | 1.6714025 | 0.00436  | <u>TADA2A</u>    |
| 0.029508 | 0.000008 | 452.782898 | 1552.72925 | 1.671261  | 0.003294 | <u>SENP2</u>     |
|          |          |            |            |           |          | <u>previous</u>  |
|          |          |            |            |           |          | <u>version</u>   |
|          |          |            |            |           |          | <u>conserved</u> |
| 0.111391 | 0.000024 | 332.250427 | 1129.17065 | 1.6706561 | 0.005819 | <u>probe</u>     |
| 0.362684 | 0.000531 | 177.130356 | 589.922363 | 1.6695213 | 0.003458 | <u>MEX3B</u>     |
|          |          |            |            |           |          | <u>previous</u>  |
|          |          |            |            |           |          | <u>version</u>   |
|          |          |            |            |           |          | <u>conserved</u> |
| 0.000095 | 0.000002 | 832.198181 | 2777.51123 | 1.6686568 | 0.001445 | <u>probe</u>     |
| 0.811591 | 0.009118 | 121.580597 | 394.875092 | 1.6686457 | 0.009071 | <u>AHR</u>       |
| 0.086981 | 0.00514  | 247.353622 | 833.731445 | 1.6663038 | 0.034086 | <u>ADM</u>       |
| 0.035143 | 0.000042 | 292.422302 | 986.709717 | 1.6639959 | 0.002348 | <u>RMDN1</u>     |
| 0.000011 | 0.000001 | 1441.14929 | 4747.10645 | 1.6636632 | 0.001311 | <u>PRICKLE1</u>  |
| 0.000003 | 0.000001 | 2450.47778 | 7809.53955 | 1.6621378 | 0.001233 | <u>FH</u>        |
| 0.000007 | 0.000001 | 1642.38611 | 5373.36084 | 1.6614107 | 0.001298 | <u>RPL17</u>     |
| 0.000003 | 0.000001 | 2168.53662 | 6938.51953 | 1.6586233 | 0.001269 | <u>ARIH1</u>     |
|          |          |            |            |           |          | <u>previous</u>  |
|          |          |            |            |           |          | <u>version</u>   |
|          |          |            |            |           |          | <u>conserved</u> |
| 0.377122 | 0.000598 | 175.034134 | 577.492859 | 1.6569703 | 0.003693 | <u>probe</u>     |
| 0.001083 | 0.000003 | 640.394348 | 2149.34448 | 1.6550683 | 0.001872 | <u>CFLAR</u>     |
| 0.085381 | 0.00009  | 248.401733 | 830.863098 | 1.654693  | 0.00275  | <u>MSN</u>       |



|          |          |            |            |           |          |                 |
|----------|----------|------------|------------|-----------|----------|-----------------|
| 0.000108 | 0.000002 | 820.669006 | 2712.49561 | 1.6541564 | 0.001553 | <u>MYLIP</u>    |
| 0.007817 | 0.000015 | 379.415314 | 1280.23669 | 1.6530281 | 0.002114 | <u>FBXO34</u>   |
| 0.189015 | 0.000059 | 272.50824  | 912.132812 | 1.6526216 | 0.008511 | <u>TMEM41A</u>  |
| 0.002636 | 0.000009 | 451.734802 | 1525.95801 | 1.6495501 | 0.001952 | <u>CIRH1A</u>   |
| 0.003128 | 0.000009 | 439.157501 | 1482.93286 | 1.6489738 | 0.001984 | <u>SARNP</u>    |
| 0.00017  | 0.000003 | 738.916565 | 2446.6958  | 1.6476372 | 0.001639 | <u>U2AF1</u>    |
| 0.505965 | 0.001157 | 158.264389 | 515.345459 | 1.6465537 | 0.004293 | <u>INO80B</u>   |
| 0.000009 | 0.000001 | 1517.66125 | 4931.63623 | 1.6463419 | 0.001404 | <u>GOLGA4</u>   |
| 0.438669 | 0.000841 | 166.649261 | 544.02887  | 1.6459072 | 0.004063 | <u>POLH</u>     |
| 0.017042 | 0.000026 | 331.202301 | 1105.26782 | 1.6445699 | 0.002361 | <u>IRS1</u>     |
| 0.000001 | 0.       | 4470.18311 | 13801.5068 | 1.6433352 | 0.001279 | <u>NFE2L2</u>   |
| 0.003946 | 0.000011 | 422.387756 | 1420.78552 | 1.6433171 | 0.002073 | <u>MEF2A</u>    |
| 0.008639 | 0.000017 | 371.030426 | 1241.99219 | 1.6427625 | 0.002226 | <u>UBE2V2</u>   |
| 0.81692  | 0.013459 | 109.003296 | 343.244934 | 1.6409636 | 0.013876 | <u>KIAA1143</u> |
| 0.019184 | 0.000029 | 324.913666 | 1080.40894 | 1.6404696 | 0.002435 | <u>TMCO3</u>    |
| 0.273095 | 0.000375 | 191.803864 | 628.166931 | 1.638301  | 0.003661 | <u>ZMYND11</u>  |
| 0.963122 | 0.036013 | 93.281662  | 290.658661 | 1.6378738 | 0.00863  | <u>VPS37A</u>   |
| 0.231206 | 0.000295 | 200.188736 | 656.850342 | 1.6372631 | 0.003545 | <u>SLC35F2</u>  |
| 0.01203  | 0.000021 | 351.116364 | 1168.37134 | 1.6372383 | 0.002353 | <u>SYNE1</u>    |
| 0.000001 | 0.       | 4697.62256 | 14376.1309 | 1.6360769 | 0.001318 | <u>CLK1</u>     |
| 0.844737 | 0.008392 | 117.388161 | 370.97226  | 1.6355371 | 0.006425 | <u>ARMC6</u>    |
| 0.207482 | 0.000285 | 205.429276 | 673.104309 | 1.6332155 | 0.003747 | <u>GGCT</u>     |
| 0.839977 | 0.008067 | 118.436272 | 373.840607 | 1.63264   | 0.006374 | <u>SPTY2D1</u>  |
| 0.966887 | 0.039586 | 92.233551  | 285.878113 | 1.6311154 | 0.008901 | <u>PAPD5</u>    |
| 0.377023 | 0.000664 | 175.034134 | 566.975647 | 1.6303692 | 0.004134 | <u>SGSH</u>     |
| 0.241085 | 0.000326 | 198.092514 | 644.420898 | 1.6257672 | 0.003759 | <u>SMG9</u>     |
| 0.874717 | 0.012574 | 113.195724 | 353.762207 | 1.6251565 | 0.007974 | <u>AMDHD2</u>   |
|          |          |            |            |           |          | GGT1   GGTLC    |
| 0.958578 | 0.033387 | 95.377884  | 294.483124 | 1.6239893 | 0.008664 | 2               |
| 0.446767 | 0.002499 | 166.649261 | 535.423889 | 1.6228324 | 0.011406 | <u>ZP3</u>      |
| 0.079465 | 0.000055 | 281.941193 | 924.562317 | 1.6218681 | 0.00388  | <u>ZNF292</u>   |
| 0.056705 | 0.000069 | 268.315796 | 879.624939 | 1.6218614 | 0.002994 | <u>MITF</u>     |
| 0.000001 | 0.       | 3437.79614 | 10582.2705 | 1.6208187 | 0.001438 | <u>WAC</u>      |
| 0.595887 | 0.001979 | 147.78331  | 470.408112 | 1.6193986 | 0.005158 | <u>ZNF674</u>   |
| 0.00001  | 0.000001 | 1472.59253 | 4695.47607 | 1.6159921 | 0.001615 | <u>ACVR2A</u>   |
| 0.000461 | 0.000004 | 611.047302 | 2001.14673 | 1.6155424 | 0.002009 | <u>DLC1</u>     |
|          |          |            |            |           |          | HSP90B1   HS    |
| 0.0003   | 0.000001 | 1593.125   | 5059.75537 | 1.6148364 | 0.002177 | P90B2P          |
| 0.165411 | 0.000182 | 222.19902  | 720.909973 | 1.6147764 | 0.003992 | <u>CHML</u>     |
| 0.998268 | 0.245501 | 66.030838  | 197.915604 | 1.6137321 | 0.015358 | <u>KLF11</u>    |
| 0.000354 | 0.000004 | 641.442444 | 2091.97754 | 1.6122038 | 0.002005 | <u>SEMA7A</u>   |
| 0.6972   | 0.003439 | 136.25412  | 429.295197 | 1.6113766 | 0.005835 | <u>MAFG</u>     |
| 0.267499 | 0.000404 | 192.851974 | 619.56189  | 1.6099752 | 0.004118 | <u>FAM83D</u>   |
| 0.290649 | 0.000464 | 188.659546 | 604.264099 | 1.6075191 | 0.004248 | <u>TIAM2</u>    |
|          |          |            |            |           |          | RAB4B   MIA-    |
| 0.355524 | 0.000657 | 178.178452 | 567.931763 | 1.6054858 | 0.004521 | RAB4B           |
| 0.005282 | 0.000014 | 402.473694 | 1315.61292 | 1.6040834 | 0.002527 | <u>PXN</u>      |
| 0.048483 | 0.000001 | 2806.83472 | 8550.52832 | 1.6025153 | 0.014705 | <u>ARPC3</u>    |
| 0.000005 | 0.000001 | 1906.50952 | 5928.86328 | 1.6019842 | 0.001657 | <u>RBBP6</u>    |
| 0.000112 | 0.000004 | 822.765259 | 2622.62085 | 1.601235  | 0.002443 | <u>GOLPH3</u>   |
| 0.000018 | 0.000001 | 1303.84705 | 4127.54443 | 1.5992893 | 0.001796 | <u>SH3BP4</u>   |
| 0.143285 | 0.000178 | 225.343338 | 723.77832  | 1.5991151 | 0.003904 | <u>EIF5</u>     |
| 0.78487  | 0.006265 | 125.773026 | 389.138428 | 1.5963995 | 0.006829 | <u>NRG1</u>     |
| 0.000001 | 0.       | 6970.97021 | 20365.2285 | 1.5951148 | 0.001555 | <u>BTF3</u>     |

|          |          |            |            |           |          |                     |
|----------|----------|------------|------------|-----------|----------|---------------------|
| 0.000007 | 0.000001 | 1641.33801 | 5138.15674 | 1.5949063 | 0.001745 | <u>AJUBA</u>        |
| 0.000202 | 0.000003 | 713.761963 | 2284.15649 | 1.5931536 | 0.00211  | <u>AATF</u>         |
| 0.007084 | 0.000001 | 1391.88818 | 4371.35352 | 1.5897089 | 0.004575 | <u>BDNF</u>         |
| 0.106993 | 0.000133 | 240.016861 | 766.803467 | 1.5881354 | 0.003901 | <u>CHCHD5</u>       |
| 0.207482 | 0.001243 | 205.429276 | 652.069763 | 1.5870361 | 0.010684 | <u>GNB1L</u>        |
|          |          |            |            |           |          | <u>previous</u>     |
|          |          |            |            |           |          | <u>version</u>      |
|          |          |            |            |           |          | <u>conserved</u>    |
| 0.000543 | 0.000005 | 593.229431 | 1907.44751 | 1.5862876 | 0.002313 | <u>probe</u>        |
|          |          |            |            |           |          | <u>LOC1005061</u>   |
| 0.997374 | 0.218276 | 69.175163  | 203.652298 | 1.5852158 | 0.015828 | <u>24</u>           |
| 0.471673 | 0.001257 | 162.456833 | 507.696564 | 1.5848881 | 0.005412 | <u>SMIM13</u>       |
| 0.983144 | 0.076918 | 84.896797  | 253.370224 | 1.5848318 | 0.011886 | <u>RSBN1</u>        |
| 0.000002 | 0.000001 | 3187.2981  | 9579.30664 | 1.5846578 | 0.001702 | <u>PCF11</u>        |
| 0.981476 | 0.072458 | 85.944901  | 256.238556 | 1.5823366 | 0.011776 | <u>LIG4</u>         |
| 0.001373 | 0.000007 | 505.188324 | 1627.30615 | 1.5813142 | 0.002519 | <u>NEDD9</u>        |
| 0.000028 | 0.000001 | 1107.85071 | 3459.2207  | 1.5810456 | 0.001992 | <u>TLCD2</u>        |
| 0.035876 | 0.000056 | 291.374176 | 928.386719 | 1.5788074 | 0.003476 | <u>STAG1</u>        |
| 0.000002 | 0.000001 | 2925.271   | 8763.74121 | 1.5786861 | 0.001761 | <u>DNAJA1</u>       |
| 0.000022 | 0.000001 | 1170.7373  | 3649.4873  | 1.5781434 | 0.001995 | <u>GNB2</u>         |
| 0.000027 | 0.000001 | 1119.38    | 3487.90405 | 1.5779413 | 0.002016 | <u>IFI44L</u>       |
| 0.182334 | 0.000269 | 211.717926 | 668.32373  | 1.5763984 | 0.004387 | <u>GSTK1</u>        |
| 0.000039 | 0.000001 | 1127.76477 | 3509.89478 | 1.5761815 | 0.002088 | <u>SQLE</u>         |
| 0.000003 | 0.000001 | 2382.35083 | 7167.03076 | 1.5755597 | 0.001821 | <u>ANXA6</u>        |
| 0.921132 | 0.023109 | 104.81086  | 313.605408 | 1.5754103 | 0.009363 | <u>METTL25</u>      |
| 0.97515  | 0.060636 | 89.089226  | 264.843597 | 1.5751161 | 0.01157  | <u>DUSP26</u>       |
| 0.003521 | 0.000012 | 430.772614 | 1379.67261 | 1.5727659 | 0.00281  | <u>LZIC</u>         |
| 0.000001 | 0.       | 6630.33496 | 19050.5723 | 1.5720639 | 0.001742 | <u>CLIC4</u>        |
|          |          |            |            |           |          | <u>SLC35E2</u>   SL |
| 0.593077 | 0.003049 | 142.54277  | 437.900238 | 1.5710289 | 0.015701 | <u>C35E2B</u>       |
| 0.092825 | 0.000129 | 244.209305 | 771.584045 | 1.5707994 | 0.004012 | <u>ALKBH5</u>       |
| 0.095145 | 0.000126 | 246.305511 | 778.276855 | 1.57052   | 0.004205 | <u>SRRD</u>         |
| 0.881262 | 0.015158 | 112.147621 | 336.552155 | 1.5700494 | 0.008778 | <u>PLEK2</u>        |
| 0.687118 | 0.003945 | 137.302231 | 419.73407  | 1.5673813 | 0.007028 | <u>BCL2</u>         |
| 0.000035 | 0.000002 | 1047.06042 | 3235.48999 | 1.5665312 | 0.002154 | <u>MAF1</u>         |
| 0.       | 0.       | 14886.2861 | 42397.9219 | 1.5656912 | 0.00174  | <u>DDIT3</u>        |
| 0.684597 | 0.004007 | 137.302231 | 418.777954 | 1.5642102 | 0.007305 | <u>FAM115C</u>      |
| 0.216533 | 0.000357 | 203.333069 | 633.903625 | 1.5618827 | 0.00484  | <u>RCVRN</u>        |
| 0.005952 | 0.000017 | 396.185028 | 1252.5094  | 1.556845  | 0.003159 | <u>PTPN21</u>       |
| 0.595896 | 0.002573 | 147.78331  | 450.329712 | 1.5562671 | 0.006745 | <u>KAZN</u>         |
| 0.988646 | 0.182556 | 73.3676    | 212.257324 | 1.5562312 | 0.021604 | <u>IQCA1</u>        |
| 0.951608 | 0.039557 | 97.474098  | 286.834229 | 1.5560308 | 0.01146  | <u>GFM2</u>         |
| 0.006774 | 0.000016 | 400.377472 | 1264.93884 | 1.5553289 | 0.003275 | <u>SKIL</u>         |
| 0.046131 | 0.000048 | 304.999603 | 956.114075 | 1.5542283 | 0.004456 | <u>ZNF134</u>       |
| 0.00849  | 0.000021 | 372.078552 | 1171.23975 | 1.5540853 | 0.003295 | <u>IFT43</u>        |
| 0.001082 | 0.000005 | 569.122986 | 1793.66992 | 1.553846  | 0.002864 | <u>SLC7A1</u>       |
| 0.000006 | 0.000001 | 1708.41699 | 5189.78711 | 1.5536752 | 0.002091 | <u>MYL6B</u>        |
| 0.660525 | 0.003632 | 140.446548 | 425.470764 | 1.5520336 | 0.00725  | <u>SPDYA</u>        |
| 0.568446 | 0.002317 | 150.927643 | 458.934753 | 1.5514325 | 0.006786 | <u>BCL2L11</u>      |
| 0.004737 | 0.000015 | 409.810455 | 1291.71008 | 1.5506754 | 0.003178 | <u>FBXL5</u>        |

|          |          |            |            |           |          |                  |
|----------|----------|------------|------------|-----------|----------|------------------|
|          |          |            |            |           |          | HNRNPCL1   L     |
|          |          |            |            |           |          | OC10106030       |
|          |          |            |            |           |          | 1   LOC64933     |
|          |          |            |            |           |          | 0   LOC44056     |
| 0.967225 | 0.054995 | 92.233551  | 269.624176 | 1.5497197 | 0.012304 | 3                |
| 0.776208 | 0.007293 | 126.821136 | 379.577271 | 1.549104  | 0.008264 | <u>C21orf7</u>   |
| 0.000001 | 0.       | 10053.457  | 28482.6367 | 1.5485854 | 0.001977 | <u>SOX4</u>      |
| 0.68808  | 0.004291 | 137.302231 | 413.997375 | 1.5482455 | 0.007556 | <u>FRMD3</u>     |
| 0.000003 | 0.000001 | 2381.30273 | 7030.30664 | 1.5479679 | 0.002067 | <u>BMP4</u>      |
| 0.001884 | 0.000009 | 477.9375   | 1502.05518 | 1.5457285 | 0.003024 | <u>ANO10</u>     |
| 0.002238 | 0.00001  | 464.312103 | 1459.03003 | 1.5454734 | 0.003066 | <u>HNMT</u>      |
| 0.68779  | 0.007384 | 137.302231 | 413.04126  | 1.5450304 | 0.012591 | <u>LY6E</u>      |
| 0.021821 | 0.000041 | 317.576904 | 988.621948 | 1.5435146 | 0.003788 | <u>PDCD6</u>     |
| 0.12174  | 0.000186 | 231.631989 | 717.08551  | 1.543069  | 0.004752 | <u>PYGO1</u>     |
| 0.000002 | 0.000001 | 3061.52515 | 8943.49121 | 1.5424401 | 0.002068 | <u>LACTB</u>     |
| 0.123256 | 0.000191 | 230.583893 | 713.261108 | 1.5420806 | 0.004758 | <u>PKN1</u>      |
| 0.034423 | 0.000059 | 293.470398 | 912.132812 | 1.5418394 | 0.00401  | <u>ADPRM</u>     |
| 0.001311 | 0.000008 | 508.332672 | 1592.88599 | 1.5416065 | 0.003001 | <u>LTF</u>       |
|          |          |            |            |           |          | PIP5K1A   PI     |
| 0.000008 | 0.000001 | 1576.35535 | 4770.05322 | 1.541311  | 0.002238 | P5K1P1           |
| 0.000126 | 0.000002 | 817.524719 | 2503.10669 | 1.5403283 | 0.002633 | <u>MRPL12</u>    |
| 0.957659 | 0.047043 | 95.377884  | 277.273071 | 1.5402545 | 0.012285 | <u>B4GALT7</u>   |
| 0.993911 | 0.205841 | 72.319489  | 206.52063  | 1.5399784 | 0.019881 | <u>STAG1</u>     |
| 0.995409 | 0.217697 | 72.319489  | 206.52063  | 1.5399784 | 0.024799 | <u>RBM41</u>     |
|          |          |            |            |           |          | FAM133B   FA     |
|          |          |            |            |           |          | M133DP   FAM     |
| 0.000041 | 0.000002 | 1006.1842  | 3053.82837 | 1.5392528 | 0.002459 | 133CP            |
| 0.230837 | 0.000427 | 200.188736 | 613.825195 | 1.5392153 | 0.005425 | <u>KIAA1671</u>  |
| 0.000002 | 0.000001 | 2720.88989 | 7940.52734 | 1.5392103 | 0.00212  | <u>LTA4H</u>     |
| 0.776491 | 0.007639 | 126.821136 | 376.708923 | 1.5385564 | 0.008621 | <u>C2orf40</u>   |
| 0.000103 | 0.000002 | 819.620911 | 2503.10669 | 1.5367455 | 0.002618 | <u>TSSC4</u>     |
| 0.910738 | 0.023969 | 106.907074 | 311.693176 | 1.5366088 | 0.010704 | <u>KIF13A</u>    |
| 0.000003 | 0.000001 | 2218.84595 | 6522.60986 | 1.5352048 | 0.002204 | <u>TBPL1</u>     |
| 0.000002 | 0.000001 | 2869.72119 | 8344.96387 | 1.5347745 | 0.002153 | <u>STC2</u>      |
| 0.001086 | 0.000007 | 525.102417 | 1636.86731 | 1.5341501 | 0.003063 | <u>GPR176</u>    |
| 0.044064 | 0.000074 | 280.893097 | 868.15155  | 1.5338674 | 0.004276 | <u>NUP37</u>     |
| 0.000001 | 0.       | 8242.32617 | 23069.1191 | 1.5331033 | 0.002048 | <u>SESN2</u>     |
| 0.017037 | 0.000036 | 331.202301 | 1023.99817 | 1.5329706 | 0.003871 | <u>MFSD8</u>     |
| 0.000002 | 0.000001 | 2712.50488 | 7876.46777 | 1.5318225 | 0.002194 | <u>C20orf111</u> |
| 0.036163 | 0.000055 | 299.759064 | 925.518433 | 1.5317976 | 0.004375 | <u>PSMF1</u>     |
| 0.978305 | 0.088477 | 85.944901  | 246.677429 | 1.5309679 | 0.015354 | <u>USP16</u>     |
| 0.986767 | 0.127576 | 80.704361  | 230.423492 | 1.5296572 | 0.01819  | <u>ARMCX5</u>    |
| 0.067422 | 0.000106 | 260.979034 | 803.135803 | 1.5284503 | 0.004662 | <u>TEX264</u>    |
| 0.       | 0.       | 10780.8447 | 30064.0508 | 1.5266597 | 0.002093 | <u>PDRG1</u>     |
| 0.002867 | 0.000012 | 445.446136 | 1381.58484 | 1.5265897 | 0.00342  | <u>TAF1A</u>     |
| 0.026012 | 0.000083 | 308.143921 | 947.509033 | 1.5254587 | 0.005392 | <u>TGM3</u>      |
| 0.033062 | 0.00006  | 295.56662  | 908.30835  | 1.5249547 | 0.004303 | <u>MAP4K5</u>    |
| 0.941367 | 0.044416 | 97.474098  | 280.141418 | 1.5232009 | 0.01412  | <u>PLXNA1</u>    |
| 0.801271 | 0.009683 | 123.676811 | 362.367218 | 1.5230164 | 0.009479 | <u>ARAF</u>      |
| 0.000011 | 0.000001 | 1433.8125  | 4299.64502 | 1.5218986 | 0.002481 | <u>RPP14</u>     |
| 0.000538 | 0.000005 | 594.277588 | 1830.00232 | 1.5216784 | 0.003093 | <u>N4BP2L1</u>   |
| 0.998591 | 0.338937 | 64.982735  | 181.661667 | 1.5210569 | 0.022035 | <u>CPXM2</u>     |
| 0.000006 | 0.000001 | 1773.39966 | 5254.80273 | 1.5206193 | 0.002419 | <u>LCMT1</u>     |
| 0.768011 | 0.00788  | 127.869247 | 374.796722 | 1.5188806 | 0.009275 | <u>C20orf27</u>  |

|          |          |            |            |           |          |                   |
|----------|----------|------------|------------|-----------|----------|-------------------|
| 0.964825 | 0.067524 | 93.281662  | 266.755829 | 1.5185458 | 0.01844  | <u>GRINA</u>      |
| 0.081479 | 0.000095 | 297.662842 | 910.220581 | 1.5175161 | 0.008465 | <u>FAM35A</u>     |
| 0.000171 | 0.000003 | 737.868408 | 2237.30688 | 1.5156463 | 0.002966 | <u>CEBPG</u>      |
| 0.518749 | 0.00224  | 155.120071 | 460.846985 | 1.5155078 | 0.023398 | <u>LRP6</u>       |
| 0.002214 | 0.00001  | 466.408325 | 1435.1272  | 1.5152095 | 0.003517 | <u>KIAA1324</u>   |
| 0.000003 | 0.000001 | 2468.29565 | 7109.66406 | 1.5146064 | 0.002422 | <u>RNF144B</u>    |
| 0.01365  | 0.000032 | 343.779602 | 1048.85718 | 1.5129052 | 0.004145 | <u>GTF3C5</u>     |
| 0.036068 | 0.000013 | 436.013184 | 1339.51575 | 1.5128419 | 0.007282 | <u>TAF12</u>      |
| 0.000947 | 0.000007 | 537.679688 | 1651.20898 | 1.5126723 | 0.003344 | <u>SNAP47</u>     |
| 0.000002 | 0.000001 | 2953.57007 | 8453.00391 | 1.5118749 | 0.002398 | <u>CDKN1B</u>     |
| 0.00002  | 0.000001 | 1206.37292 | 3588.29614 | 1.5105175 | 0.002698 | <u>CLCN4</u>      |
| 0.750627 | 0.007408 | 129.965469 | 378.621155 | 1.5081059 | 0.009538 | <u>PSMB10</u>     |
| 0.01704  | 0.000038 | 331.202301 | 1006.78809 | 1.5077786 | 0.004334 | <u>DNASE2</u>     |
| 0.000344 | 0.000004 | 645.634888 | 1960.98987 | 1.5060048 | 0.003231 | <u>C16orf87</u>   |
| 0.000002 | 0.000001 | 2593.02051 | 7398.41064 | 1.5044813 | 0.002498 | <u>CCNL1</u>      |
| 0.178409 | 0.000343 | 212.766037 | 638.684204 | 1.5031675 | 0.006021 | <u>FAM96A</u>     |
| 0.000003 | 0.000001 | 2199.97998 | 6334.25537 | 1.5029132 | 0.002558 | <u>PRPF19</u>     |
| 0.824911 | 0.012583 | 120.532486 | 347.069397 | 1.5024615 | 0.010643 | <u>ACOT8</u>      |
| 0.002749 | 0.000018 | 448.590485 | 1367.24304 | 1.5014479 | 0.004514 | <u>COMMD2</u>     |
| 0.000022 | 0.000001 | 1178.0741  | 3476.43066 | 1.4993401 | 0.002853 | <u>RPL9</u>       |
| 0.809289 | 0.011394 | 122.6287   | 352.806091 | 1.4988633 | 0.01059  | <u>GEMIN8</u>     |
| 0.000025 | 0.000001 | 1137.19775 | 3352.13599 | 1.4980914 | 0.002891 | <u>NT5C2</u>      |
|          |          |            |            |           |          | <u>LOC1001290</u> |
| 0.00016  | 0.000003 | 749.397644 | 2240.17529 | 1.4958732 | 0.003236 | <u>34</u>         |
| 0.010085 | 0.000028 | 361.597473 | 1091.8822  | 1.4957706 | 0.004354 | <u>LOC285629</u>  |
| 0.000013 | 0.000001 | 1355.20435 | 3989.86401 | 1.4947236 | 0.002838 | <u>NAA50</u>      |
| 0.899414 | 0.025301 | 109.003296 | 308.824829 | 1.4940279 | 0.012444 | <u>UBN1</u>       |
| 0.000001 | 0.       | 5440.73145 | 14967.0098 | 1.4939754 | 0.002493 | <u>PSAT1</u>      |
| 0.000007 | 0.000001 | 1664.39636 | 4863.75195 | 1.4921632 | 0.002783 | <u>DBB1</u>       |
| 0.005627 | 0.000019 | 398.28125  | 1203.74756 | 1.4917761 | 0.004207 | <u>RCAN1</u>      |
| 0.000004 | 0.000001 | 2124.51611 | 6087.57812 | 1.4915167 | 0.002706 | <u>CARS</u>       |
| 0.002488 | 0.000011 | 465.360199 | 1408.35596 | 1.4913293 | 0.003982 | <u>BASP1</u>      |
| 0.000005 | 0.000001 | 1852.00781 | 5359.97559 | 1.4902778 | 0.002766 | <u>CHD2</u>       |
| 0.000025 | 0.000001 | 1145.58264 | 3357.87256 | 1.489929  | 0.002999 | <u>DIDO1</u>      |
| 0.295183 | 0.000272 | 224.295242 | 669.279846 | 1.4899181 | 0.025562 | <u>WAC</u>        |
| 0.000394 | 0.000005 | 628.865173 | 1891.1936  | 1.4895797 | 0.003512 | <u>CCNG1</u>      |
| 0.000059 | 0.000002 | 927.576111 | 2723.96899 | 1.4888919 | 0.003161 | <u>NKIRAS2</u>    |
| 0.013407 | 0.000034 | 344.827728 | 1034.51538 | 1.4878914 | 0.00463  | <u>EXOSC2</u>     |
| 0.186297 | 0.000384 | 210.66983  | 625.298584 | 1.4877066 | 0.006498 | <u>GTF2H4</u>     |
| 0.341708 | 0.000981 | 180.274673 | 529.687195 | 1.4866401 | 0.00748  | <u>KIF1C</u>      |
| 0.001002 | 0.000007 | 532.439148 | 1604.35938 | 1.4853104 | 0.003803 | <u>KPNA2</u>      |
| 0.000001 | 0.       | 8166.86182 | 22089.1035 | 1.4848629 | 0.002559 | <u>PPIB</u>       |
| 0.278494 | 0.000683 | 191.803864 | 564.1073   | 1.4826284 | 0.007493 | <u>ZKSCAN2</u>    |
|          |          |            |            |           |          | <u>previous</u>   |
|          |          |            |            |           |          | <u>version</u>    |
|          |          |            |            |           |          | <u>conserved</u>  |
| 0.99805  | 0.332745 | 67.078949  | 182.617783 | 1.4823442 | 0.024379 | <u>probe</u>      |
| 0.887441 | 0.023535 | 111.09951  | 312.649292 | 1.4819829 | 0.012777 | <u>ERRF1</u>      |
| 0.399417 | 0.001345 | 171.889801 | 501.959869 | 1.4819128 | 0.00798  | <u>ZNF518B</u>    |
| 0.061004 | 0.000012 | 464.312103 | 1394.97046 | 1.4808204 | 0.012861 | <u>CETN2</u>      |
| 0.497287 | 0.002184 | 159.3125   | 462.759216 | 1.4806763 | 0.008631 | <u>GLTP</u>       |
| 0.235792 | 0.00055  | 199.140625 | 586.0979   | 1.480372  | 0.007038 | <u>CD14</u>       |
| 0.004406 | 0.00001  | 483.17804  | 1450.42505 | 1.4796786 | 0.004693 | <u>SPG20</u>      |
| 0.000003 | 0.000001 | 2226.18262 | 6300.7915  | 1.4785011 | 0.002904 | <u>GNL2</u>       |

|          |          |            |            |           |          |                   |
|----------|----------|------------|------------|-----------|----------|-------------------|
| 0.001188 | 0.000008 | 517.765625 | 1552.72925 | 1.4783971 | 0.003973 | <u>ZSWIM6</u>     |
| 0.000856 | 0.000006 | 585.8927   | 1753.51318 | 1.4781754 | 0.00397  | <u>NCOA5</u>      |
| 0.149944 | 0.000302 | 221.150909 | 653.981995 | 1.4781105 | 0.006515 | <u>IKBIP</u>      |
| 0.586393 | 0.004808 | 141.494659 | 406.34848  | 1.4762718 | 0.032823 | <u>CPO</u>        |
|          |          |            |            |           |          | <u>previous</u>   |
|          |          |            |            |           |          | <u>version</u>    |
|          |          |            |            |           |          | <u>conserved</u>  |
| 0.000026 | 0.000002 | 1121.4762  | 3255.56836 | 1.4762311 | 0.003206 | <u>probe</u>      |
| 0.002362 | 0.000012 | 460.119659 | 1377.76038 | 1.4759888 | 0.004219 | <u>FRMD6</u>      |
| 0.532416 | 0.002641 | 155.120071 | 448.41748  | 1.4759369 | 0.009041 | <u>DESI1</u>      |
| 0.055531 | 0.000084 | 284.037415 | 844.248718 | 1.4757309 | 0.006203 | <u>SEC16A</u>     |
| 0.000007 | 0.000001 | 1675.92566 | 4837.93701 | 1.4745656 | 0.003013 | <u>CRKL</u>       |
| 0.541349 | 0.003318 | 154.07196  | 444.593048 | 1.4739188 | 0.010558 | <u>ABHD3</u>      |
| 0.019826 | 0.000047 | 322.817444 | 958.982422 | 1.4738063 | 0.005125 | <u>PPM1D</u>      |
| 0.827877 | 0.017104 | 117.388161 | 329.859344 | 1.4722063 | 0.014321 | <u>CCDC92</u>     |
| 0.143549 | 0.000292 | 223.247131 | 657.806458 | 1.4720723 | 0.006641 | <u>PCK2</u>       |
| 0.000014 | 0.000001 | 1339.48279 | 3874.17407 | 1.4693286 | 0.003198 | <u>SNAPC1</u>     |
| 0.00651  | 0.000022 | 388.848297 | 1155.94189 | 1.469253  | 0.004718 | <u>CASP2</u>      |
| 0.07381  | 0.000103 | 273.556335 | 808.872498 | 1.4683137 | 0.006963 | <u>OR51Q1</u>     |
| 0.000127 | 0.000003 | 783.985229 | 2293.71753 | 1.4681163 | 0.003688 | <u>ME3</u>        |
| 0.491668 | 0.003471 | 160.360611 | 461.803101 | 1.467645  | 0.020461 | <u>YAF2</u>       |
| 0.000001 | 0.       | 7745.52246 | 20687.4395 | 1.4675501 | 0.002778 | <u>BAMBI</u>      |
| 0.006096 | 0.00002  | 402.473694 | 1196.09863 | 1.4669433 | 0.004805 | <u>RASA1</u>      |
| 0.000108 | 0.000003 | 810.187927 | 2362.55786 | 1.4664026 | 0.003627 | <u>GAMT</u>       |
| 0.003667 | 0.000005 | 649.827332 | 1913.1842  | 1.4597371 | 0.005627 | <u>ASB8</u>       |
| 0.001265 | 0.000009 | 511.47699  | 1513.52856 | 1.4591501 | 0.004356 | <u>BCL2L1</u>     |
| 0.226021 | 0.000566 | 201.236847 | 583.229553 | 1.4572027 | 0.007722 | <u>KLHL28</u>     |
| 0.000014 | 0.000001 | 1344.72327 | 3855.05176 | 1.4565779 | 0.003391 | <u>BHLHB9</u>     |
| 0.000004 | 0.000001 | 2049.05225 | 5751.98193 | 1.4562873 | 0.003201 | <u>SIRT7</u>      |
| 0.002673 | 0.000013 | 450.686676 | 1330.91077 | 1.4559606 | 0.004666 | <u>GORAB</u>      |
| 0.000071 | 0.000002 | 887.747986 | 2552.82446 | 1.4544859 | 0.003739 | <u>NAT14</u>      |
| 0.000351 | 0.000005 | 642.49054  | 1884.50085 | 1.4534443 | 0.004115 | <u>RHOB</u>       |
| 0.000334 | 0.000002 | 1143.48645 | 3267.04175 | 1.4531908 | 0.00451  | <u>TADA3</u>      |
| 0.993217 | 0.209811 | 76.511925  | 205.564514 | 1.4524101 | 0.022854 | <u>ANP32E</u>     |
|          |          |            |            |           |          | <u>previous</u>   |
|          |          |            |            |           |          | <u>version</u>    |
|          |          |            |            |           |          | <u>conserved</u>  |
| 0.77635  | 0.011208 | 126.821136 | 353.762207 | 1.4511656 | 0.01245  | <u>probe</u>      |
| 0.328348 | 0.001057 | 182.370895 | 522.994385 | 1.4504958 | 0.008663 | <u>CEP63</u>      |
| 0.88126  | 0.025301 | 112.147621 | 308.824829 | 1.4504947 | 0.014363 | <u>LINC00341</u>  |
| 0.586718 | 0.003837 | 148.831421 | 421.646301 | 1.4502729 | 0.01051  | <u>TROVE2</u>     |
| 0.006096 | 0.000022 | 393.04071  | 1152.11743 | 1.4484499 | 0.005156 | <u>SNX16</u>      |
|          |          |            |            |           |          | <u>previous</u>   |
|          |          |            |            |           |          | <u>version</u>    |
|          |          |            |            |           |          | <u>conserved</u>  |
| 0.422675 | 0.001734 | 168.745483 | 480.925354 | 1.4482885 | 0.009386 | <u>probe</u>      |
| 0.422673 | 0.001734 | 168.745483 | 480.925354 | 1.4482885 | 0.009388 | <u>EHBP1L1</u>    |
| 0.974544 | 0.106028 | 88.041122  | 238.072403 | 1.4482388 | 0.020398 | <u>C10orf111</u>  |
| 0.994738 | 0.240785 | 74.41571   | 198.871719 | 1.447775  | 0.024149 | <u>PIP5KL1</u>    |
|          |          |            |            |           |          | <u>LOC1005078</u> |
| 0.824877 | 0.01596  | 120.532486 | 333.683807 | 1.4477713 | 0.013365 | <u>55</u>         |
| 0.998055 | 0.364576 | 67.078949  | 177.837219 | 1.4465109 | 0.027828 | <u>TMPO</u>       |
| 0.000002 | 0.000001 | 3060.47705 | 8360.26172 | 1.4441952 | 0.003256 | <u>EPC2</u>       |
| 0.000027 | 0.000002 | 1119.38    | 3177.16699 | 1.4439239 | 0.003725 | <u>ZNF638</u>     |

|          |          |            |            |           |          |                   |
|----------|----------|------------|------------|-----------|----------|-------------------|
| 0.245947 | 0.000676 | 197.044418 | 565.063416 | 1.443714  | 0.008336 | <u>ASCC1</u>      |
| 0.019448 | 0.000051 | 323.86554  | 942.728455 | 1.4435533 | 0.005861 | <u>BCO2</u>       |
| 0.31532  | 0.001213 | 184.467102 | 526.818848 | 1.4435028 | 0.009929 | <u>EIF2AK1</u>    |
| 0.000165 | 0.00001  | 743.109009 | 2145.52002 | 1.4430121 | 0.006181 | <u>ENTPD7</u>     |
| 0.068913 | 0.00013  | 265.171478 | 770.62793  | 1.4428615 | 0.007095 | <u>TPRA1</u>      |
| 0.000001 | 0.       | 4819.20312 | 12931.4424 | 1.4420131 | 0.003193 | <u>IL8</u>        |
| 0.000886 | 0.000008 | 543.968323 | 1590.0177  | 1.4415724 | 0.004608 | <u>NMNAT1</u>     |
|          |          |            |            |           |          | CBWD1   CBWD      |
|          |          |            |            |           |          | 3   CBWD2   CB    |
|          |          |            |            |           |          | WD5   CBWD7       |
| 0.000208 | 0.000004 | 711.66571  | 2058.51367 | 1.4415072 | 0.00422  | CBWD6             |
| 0.12239  | 0.00006  | 313.38446  | 908.30835  | 1.4374497 | 0.016378 | <u>TBC1D12</u>    |
| 0.123216 | 0.000288 | 230.583893 | 664.499268 | 1.4371026 | 0.007717 | <u>PPM1A</u>      |
| 0.000803 | 0.000007 | 553.401306 | 1610.09607 | 1.434918  | 0.00472  | <u>NUP54</u>      |
| 0.00372  | 0.000017 | 426.5802   | 1241.03601 | 1.4343371 | 0.005282 | <u>TDP2</u>       |
| 0.967188 | 0.086721 | 92.233551  | 247.633545 | 1.434314  | 0.019495 | <u>MRPL2</u>      |
| 0.056742 | 0.000124 | 269.363892 | 778.276855 | 1.4340914 | 0.006938 | <u>PRPF4B</u>     |
| 0.969683 | 0.16518  | 81.752472  | 217.037888 | 1.4301986 | 0.033031 | <u>SAP30L</u>     |
| 0.50597  | 0.00557  | 158.264389 | 443.636932 | 1.429705  | 0.018241 | <u>BCCIP</u>      |
| 0.930838 | 0.047962 | 102.714638 | 276.316956 | 1.4285362 | 0.01742  | <u>IFI6</u>       |
| 0.000021 | 0.000001 | 1189.60327 | 3340.6626  | 1.4280476 | 0.003961 | <u>UCK2</u>       |
| 0.015136 | 0.000015 | 461.167786 | 1334.73523 | 1.4270313 | 0.00825  | <u>PHF20L1</u>    |
| 0.000007 | 0.000001 | 1981.97327 | 5468.97217 | 1.4264758 | 0.003803 | <u>SLTM</u>       |
| 0.951108 | 0.065614 | 97.474098  | 261.019135 | 1.4256993 | 0.018836 | <u>ZCCHC7</u>     |
| 0.256513 | 0.000776 | 194.948196 | 551.677795 | 1.4254298 | 0.009112 | <u>MITD1</u>      |
| 0.001884 | 0.000012 | 477.9375   | 1381.58484 | 1.4253418 | 0.005232 | <u>LAP3</u>       |
| 0.000794 | 0.000007 | 575.411621 | 1662.68237 | 1.4251075 | 0.004985 | <u>ARHGAP12</u>   |
| 0.613741 | 0.005909 | 145.687088 | 404.436249 | 1.4250143 | 0.014002 | <u>ATG12</u>      |
| 0.001463 | 0.00001  | 498.899689 | 1440.86389 | 1.4241071 | 0.005168 | <u>FUBP1</u>      |
| 0.099095 | 0.000228 | 241.064972 | 689.358215 | 1.423204  | 0.00778  | <u>NUP98</u>      |
| 0.000098 | 0.000003 | 826.957642 | 2339.61108 | 1.4231231 | 0.004403 | <u>PPID</u>       |
| 0.430618 | 0.002003 | 167.697372 | 469.451996 | 1.4229034 | 0.010531 | <u>PHACTR2</u>    |
|          |          |            |            |           |          | <u>LOC1001330</u> |
| 0.463293 | 0.002354 | 163.504944 | 457.022522 | 1.4228594 | 0.010785 | <u>50</u>         |
| 0.916006 | 0.041119 | 105.858963 | 283.965881 | 1.4221433 | 0.017264 | <u>KLHL24</u>     |
| 0.000003 | 0.000001 | 2260.77026 | 6147.81348 | 1.4200777 | 0.003748 | <u>PPFIA1</u>     |
| 0.000007 | 0.000001 | 1666.49268 | 4635.24072 | 1.4179233 | 0.003941 | <u>KLF5</u>       |
| 0.000003 | 0.000001 | 2490.30591 | 6710.0083  | 1.4175735 | 0.003804 | <u>FAM214A</u>    |
| 0.012472 | 0.00004  | 349.020142 | 997.226929 | 1.4152645 | 0.006391 | <u>LARP4</u>      |
| 0.000002 | 0.000001 | 2787.96875 | 7472.03125 | 1.4148744 | 0.003765 | <u>SRSF9</u>      |
| 0.817132 | 0.017405 | 121.580597 | 328.903229 | 1.4144518 | 0.015192 | <u>MOCS2</u>      |
| 0.000049 | 0.000002 | 962.163696 | 2679.98779 | 1.4142924 | 0.004624 | <u>MAP3K9</u>     |
|          |          |            |            |           |          | previous          |
|          |          |            |            |           |          | version           |
|          |          |            |            |           |          | conserved         |
| 0.0015   | 0.000011 | 496.803467 | 1423.65381 | 1.4128593 | 0.005452 | probe             |
| 0.961792 | 0.083307 | 94.329773  | 249.545761 | 1.4122835 | 0.020554 | <u>OR6V1</u>      |
| 0.007546 | 0.000029 | 379.415314 | 1082.32117 | 1.4112024 | 0.006223 | <u>PTGES2</u>     |
| 0.000002 | 0.000001 | 3219.78955 | 8594.50879 | 1.4111198 | 0.003786 | <u>DDX1</u>       |
|          |          |            |            |           |          | FUNDC2   FUN      |
| 0.043461 | 0.000107 | 281.941193 | 802.179688 | 1.410833  | 0.007409 | DC2P2             |
| 0.566766 | 0.00552  | 146.735199 | 403.480133 | 1.4107496 | 0.032349 | <u>C15orf38</u>   |
| 0.000314 | 0.000005 | 656.115967 | 1868.24683 | 1.4102928 | 0.00502  | <u>MED13</u>      |
| 0.557139 | 0.004172 | 150.927643 | 415.909607 | 1.4098142 | 0.016814 | <u>PEX10</u>      |

|          |          |            |            |           |          |                  |
|----------|----------|------------|------------|-----------|----------|------------------|
| 0.000001 | 0.000001 | 3531.07788 | 9406.25    | 1.4095288 | 0.003789 | <u>GLO1</u>      |
|          |          |            |            |           |          | CCL18 LOC1       |
| 0.112915 | 0.000277 | 234.776321 | 664.499268 | 1.4094521 | 0.00843  | 01060271         |
| 0.013897 | 0.000001 | 1931.66406 | 5280.61768 | 1.4093621 | 0.014873 | <u>KIF1B</u>     |
| 0.000017 | 0.000001 | 1269.25952 | 3519.45581 | 1.4092469 | 0.004276 | <u>IP6K2</u>     |
| 0.101852 | 0.000246 | 240.016861 | 679.797119 | 1.4091321 | 0.008337 | <u>CINP</u>      |
| 0.897841 | 0.046143 | 104.81086  | 278.229187 | 1.4089794 | 0.022358 | <u>ARL16</u>     |
| 0.438663 | 0.002211 | 166.649261 | 461.803101 | 1.4087492 | 0.01126  | <u>WDR81</u>     |
| 0.993837 | 0.255216 | 75.463821  | 196.003387 | 1.4079724 | 0.02776  | <u>RNF141</u>    |
| 0.091927 | 0.000095 | 289.277954 | 821.302002 | 1.4074448 | 0.011876 | <u>CCDC137</u>   |
| 0.951975 | 0.080052 | 95.377884  | 251.457993 | 1.4066536 | 0.022358 | <u>TMEM170A</u>  |
| 0.000063 | 0.000002 | 913.950684 | 2540.39502 | 1.4064789 | 0.004645 | <u>TGM2</u>      |
| 0.070103 | 0.000169 | 257.834717 | 730.47113  | 1.4061003 | 0.008005 | <u>TCF4</u>      |
| 0.000004 | 0.000001 | 2149.67065 | 5811.26123 | 1.4052025 | 0.00422  | <u>DAPK3</u>     |
| 0.000106 | 0.000003 | 823.813354 | 2302.32275 | 1.4043932 | 0.004832 | <u>PXK</u>       |
|          |          |            |            |           |          | RPS2P32 RP       |
| 0.296645 | 0.001068 | 187.611435 | 522.038269 | 1.4043725 | 0.010325 | S2               |
| 0.006833 | 0.000083 | 385.703949 | 1093.79443 | 1.4018127 | 0.010246 | <u>CDC27</u>     |
| 0.001402 | 0.000001 | 1483.07361 | 4095.03638 | 1.4017674 | 0.007436 | <u>PSMD11</u>    |
| 0.00025  | 0.000004 | 692.799744 | 1954.29712 | 1.4012956 | 0.005142 | <u>TXNRD2</u>    |
|          |          |            |            |           |          | <u>previous</u>  |
|          |          |            |            |           |          | <u>version</u>   |
|          |          |            |            |           |          | <u>conserved</u> |
| 0.000109 | 0.000003 | 828.005798 | 2308.05933 | 1.4010179 | 0.004928 | <u>probe</u>     |
| 0.733181 | 0.010669 | 132.061676 | 356.630554 | 1.4004099 | 0.014709 | <u>COG7</u>      |
| 0.062592 | 0.000145 | 267.2677   | 753.417847 | 1.3975217 | 0.00841  | <u>WDR47</u>     |
| 0.203071 | 0.000615 | 206.477386 | 574.624573 | 1.3962394 | 0.009877 | <u>MANBAL</u>    |
| 0.430625 | 0.002239 | 167.697372 | 460.846985 | 1.3961284 | 0.01182  | <u>SYT1</u>      |
| 0.000058 | 0.000002 | 929.672302 | 2563.3418  | 1.3960827 | 0.004852 | <u>CLN3</u>      |
| 0.000026 | 0.000002 | 1128.81299 | 3097.80957 | 1.3954651 | 0.004661 | <u>DRAM1</u>     |
| 0.810398 | 0.026727 | 115.291946 | 305.956482 | 1.3951903 | 0.025739 | <u>FAM151B</u>   |
| 0.00001  | 0.000001 | 1454.77466 | 3997.51294 | 1.3949963 | 0.00446  | <u>MCFD2</u>     |
| 0.391853 | 0.001863 | 172.937912 | 475.18869  | 1.3932609 | 0.011638 | <u>CSTF2</u>     |
| 0.000032 | 0.000002 | 1085.84045 | 2970.64648 | 1.3913637 | 0.004842 | <u>EIF3K</u>     |
| 0.137428 | 0.000375 | 225.343338 | 628.166931 | 1.3910037 | 0.009435 | <u>SHCBP1</u>    |
| 0.000002 | 0.000001 | 2716.69751 | 7160.33838 | 1.3900121 | 0.004242 | <u>RGS3</u>      |
| 0.000015 | 0.000001 | 1316.42432 | 3600.72559 | 1.389298  | 0.004659 | <u>SNX25</u>     |
|          |          |            |            |           |          | RASA4B RAS       |
| 0.86746  | 0.030976 | 114.243835 | 301.175934 | 1.387272  | 0.01969  | A4CP             |
| 0.000004 | 0.000041 | 2479.82495 | 6550.3374  | 1.3872631 | 0.017634 | <u>PLP2</u>      |
| 0.000007 | 0.000001 | 1649.7229  | 4495.64844 | 1.3863035 | 0.004568 | <u>MRPS18C</u>   |
| 0.221203 | 0.000767 | 202.284958 | 558.370605 | 1.3861901 | 0.010851 | <u>LRRC27</u>    |
| 0.00052  | 0.000003 | 830.10199  | 2288.93701 | 1.3850216 | 0.006229 | <u>SARNP</u>     |
| 0.000001 | 0.000001 | 3782.62378 | 9896.73633 | 1.3842331 | 0.004248 | <u>ZMAT3</u>     |
| 0.000116 | 0.000003 | 797.610657 | 2203.84277 | 1.3841513 | 0.005325 | <u>RRP12</u>     |
| 0.704616 | 0.010329 | 134.157898 | 358.542755 | 1.3837379 | 0.017019 | <u>MTR</u>       |
| 0.001812 | 0.000013 | 481.081848 | 1350.98914 | 1.3836644 | 0.00632  | <u>PPIL4</u>     |
| 0.463292 | 0.002781 | 163.504944 | 444.593048 | 1.3829528 | 0.012798 | <u>MINPP1</u>    |
| 0.000736 | 0.000001 | 1579.49963 | 4298.68896 | 1.3816894 | 0.00736  | <u>UBE2NL</u>    |
| 0.000001 | 0.       | 6371.45215 | 16056.9795 | 1.3816419 | 0.004195 | <u>TARS</u>      |
| 0.058149 | 0.000131 | 275.652557 | 768.715698 | 1.3812204 | 0.00922  | <u>IQCK</u>      |
| 0.000001 | 0.       | 8806.20801 | 22108.2246 | 1.3789678 | 0.004212 | <u>PLK2</u>      |
| 0.256551 | 0.000941 | 194.948196 | 533.511658 | 1.3769699 | 0.011265 | <u>ZMIZ1</u>     |
| 0.974236 | 0.146393 | 86.993012  | 222.774582 | 1.3758025 | 0.028601 | <u>SMIM11</u>    |

|          |          |            |            |           |          |                   |
|----------|----------|------------|------------|-----------|----------|-------------------|
| 0.975281 | 0.129726 | 89.089226  | 228.511261 | 1.3757956 | 0.025394 | <u>BICD1</u>      |
| 0.935379 | 0.063065 | 101.666534 | 262.931366 | 1.3748055 | 0.021852 | <u>GTF3C3</u>     |
| 0.000043 | 0.000002 | 995.703125 | 2693.37329 | 1.3735084 | 0.005307 | <u>NEXN</u>       |
| 0.123407 | 0.000351 | 230.583893 | 635.815857 | 1.3732413 | 0.010043 | <u>TMEM237</u>    |
| 0.847277 | 0.026247 | 117.388161 | 306.912598 | 1.371946  | 0.018804 | <u>THAP4</u>      |
| 0.008784 | 0.000035 | 369.98233  | 1026.86646 | 1.3716066 | 0.007551 | <u>TMEM9B</u>     |
| 0.12798  | 0.000363 | 229.535782 | 631.991394 | 1.3715007 | 0.010268 | <u>DTNA</u>       |
| 0.000089 | 0.000003 | 844.775513 | 2305.19092 | 1.3711028 | 0.005578 | <u>USP53</u>      |
| 0.000003 | 0.000001 | 2585.68384 | 6733.91113 | 1.3706181 | 0.004707 | <u>EFNB2</u>      |
|          |          |            |            |           |          | LOC1010604        |
| 0.20475  | 0.000507 | 216.958481 | 594.702942 | 1.3699626 | 0.013975 | 09  <u>NUDT17</u> |
| 0.000004 | 0.000003 | 2016.56091 | 5351.37012 | 1.3697176 | 0.007648 | <u>NECAP2</u>     |
| 0.009908 | 0.000039 | 362.645569 | 1004.87585 | 1.3693729 | 0.007708 | <u>CDK8</u>       |
| 0.989103 | 0.229213 | 80.704361  | 204.608414 | 1.3691503 | 0.040867 | <u>RAI1</u>       |
| 0.000001 | 0.       | 10095.3818 | 25166.834  | 1.3678174 | 0.004407 | <u>BAG3</u>       |
| 0.014104 | 0.000006 | 611.047302 | 1693.27795 | 1.3653751 | 0.01231  | <u>VAMP3</u>      |
| 0.981469 | 0.161894 | 85.944901  | 217.994003 | 1.3639865 | 0.027737 | <u>KIAA1967</u>   |
|          |          |            |            |           |          | AMACR C1QT        |
| 0.982772 | 0.171925 | 84.896797  | 215.125656 | 1.3637964 | 0.028436 | NF3-AMACR         |
| 0.000115 | 0.000003 | 804.947388 | 2190.45728 | 1.3622174 | 0.005901 | <u>AUH</u>        |
| 0.000004 | 0.000001 | 1996.64685 | 5275.8374  | 1.3620769 | 0.004992 | <u>SEC11C</u>     |
| 0.391841 | 0.00213  | 172.937912 | 464.671417 | 1.3608686 | 0.013379 | <u>SECISBP2</u>   |
| 0.281789 | 0.001152 | 190.755768 | 515.345459 | 1.3601921 | 0.012614 | <u>KDM4C</u>      |
| 0.235772 | 0.000886 | 199.140625 | 539.248352 | 1.3597975 | 0.01194  | <u>NEXN</u>       |
| 0.245967 | 0.000951 | 197.044418 | 532.555542 | 1.3579613 | 0.01213  | <u>TCEAL1</u>     |
| 0.000002 | 0.000006 | 2615.03101 | 6740.604   | 1.3564091 | 0.009973 | <u>SRSF1</u>      |
| 0.267473 | 0.001103 | 192.851974 | 519.169922 | 1.3541217 | 0.012554 | <u>CAPN1</u>      |
| 0.879759 | 0.038272 | 112.147621 | 287.790344 | 1.3524053 | 0.021771 | <u>FAM49B</u>     |
| 0.001467 | 0.000019 | 502.044006 | 1378.71643 | 1.3515836 | 0.008665 | <u>MCM4</u>       |
| 0.793124 | 0.019513 | 124.724922 | 323.166565 | 1.350898  | 0.019392 | <u>MCCC1</u>      |
| 0.000457 | 0.000006 | 612.095398 | 1678.93628 | 1.3502377 | 0.006739 | <u>RAB3GAP2</u>   |
| 0.007566 | 0.000034 | 379.415314 | 1037.38379 | 1.3491167 | 0.008266 | <u>DYNC2LI1</u>   |
| 0.056648 | 0.001559 | 268.315796 | 731.427246 | 1.3476439 | 0.029829 | <u>SLC39A6</u>    |
| 0.031116 | 0.000099 | 298.710938 | 814.609192 | 1.3473154 | 0.009489 | <u>CRY1</u>       |
| 0.235789 | 0.000931 | 199.140625 | 534.467773 | 1.3469099 | 0.01262  | <u>PSENN</u>      |
| 0.002673 | 0.000017 | 450.686676 | 1233.38708 | 1.3463791 | 0.007725 | <u>DUSP11</u>     |
| 0.117967 | 0.000369 | 232.680099 | 630.079163 | 1.3462363 | 0.011234 | <u>BPNT1</u>      |
| 0.000045 | 0.000002 | 981.029602 | 2605.41089 | 1.3452298 | 0.00608  | <u>BCAR3</u>      |
|          |          |            |            |           |          | DGCR6 DGCR        |
| 0.29661  | 0.00136  | 187.611435 | 501.003754 | 1.3448497 | 0.013369 | 6L                |
| 0.027102 | 0.000089 | 306.047699 | 832.77533  | 1.3438233 | 0.009515 | <u>CNOT2</u>      |
| 0.000649 | 0.000001 | 1609.89478 | 4269.04932 | 1.3437157 | 0.008655 | <u>TNKS2</u>      |
| 0.96769  | 0.122285 | 92.233551  | 231.379608 | 1.3426058 | 0.027846 | <u>FKBP15</u>     |
| 0.471673 | 0.003439 | 162.456833 | 429.295197 | 1.3421211 | 0.015325 | <u>AK2</u>        |
| 0.997742 | 0.441994 | 68.12706   | 167.319962 | 1.3417788 | 0.039868 | <u>ACRC</u>       |
| 0.022471 | 0.000077 | 316.528778 | 859.546509 | 1.3405141 | 0.009488 | <u>PLA2G16</u>    |
| 0.113564 | 0.000204 | 259.930939 | 704.656067 | 1.340198  | 0.014944 | <u>CPEB3</u>      |



|          |          |            |            |           |          |                                                                                                                              |
|----------|----------|------------|------------|-----------|----------|------------------------------------------------------------------------------------------------------------------------------|
|          |          |            |            |           |          | GUSBP3   LOC<br>101060519  <br>LOC1006530<br>61   GUSBP4  <br>GUSBP2   GUS<br>BP1   SMA5   L<br>OC10017093<br>9   GUSBP9   G |
| 0.000084 | 0.000003 | 860.497131 | 2296.58594 | 1.3397037 | 0.006445 | USB                                                                                                                          |
| 0.893439 | 0.045262 | 110.051399 | 279.185303 | 1.3390784 | 0.02309  | <u>SP100</u>                                                                                                                 |
| 0.995396 | 0.345224 | 73.3676    | 180.705551 | 1.3388418 | 0.036833 | <u>AFP</u>                                                                                                                   |
| 0.149945 | 0.000555 | 221.150909 | 593.746826 | 1.3382635 | 0.012609 | <u>DLG1</u>                                                                                                                  |
| 0.25118  | 0.001068 | 195.996307 | 522.038269 | 1.3372772 | 0.013331 | <u>ZMYM4</u>                                                                                                                 |
| 0.000664 | 0.000009 | 572.267273 | 1555.59753 | 1.3371248 | 0.007574 | <u>MRPL23</u>                                                                                                                |
| 0.027603 | 0.000094 | 304.999603 | 826.08252  | 1.3369586 | 0.009869 | <u>BAG5</u>                                                                                                                  |
| 0.084797 | 0.000232 | 254.690384 | 688.4021   | 1.3367678 | 0.01182  | <u>MTAP</u>                                                                                                                  |
| 0.000001 | 0.       | 9394.19727 | 22894.1504 | 1.3364467 | 0.005127 | <u>ITGB1</u>                                                                                                                 |
| 0.409072 | 0.002104 | 176.082245 | 465.627533 | 1.336193  | 0.028274 | <u>SIGMAR1</u>                                                                                                               |
| 0.34858  | 0.001887 | 179.226562 | 474.232574 | 1.3355343 | 0.014474 | <u>RANBP9</u>                                                                                                                |
| 0.935383 | 0.073903 | 101.666534 | 255.282455 | 1.3349256 | 0.025602 | <u>CYP2R1</u>                                                                                                                |
| 0.993217 | 0.297455 | 76.511925  | 188.354462 | 1.3343011 | 0.035617 | <u>TADA2A</u>                                                                                                                |
| 0.008994 | 0.000111 | 368.934204 | 998.183044 | 1.3337401 | 0.013608 | <u>C11orf49</u>                                                                                                              |
| 0.010441 | 0.000045 | 359.501251 | 972.367981 | 1.3335142 | 0.009116 | <u>SHB</u>                                                                                                                   |
| 0.000054 | 0.000002 | 942.249634 | 2488.76489 | 1.3330666 | 0.006495 | <u>TNFRSF14</u>                                                                                                              |
| 0.984446 | 0.201661 | 83.848686  | 207.476746 | 1.3328143 | 0.032461 | <u>COMMD8</u>                                                                                                                |
| 0.894692 | 0.066919 | 103.762749 | 260.063019 | 1.3305443 | 0.033077 | <u>DLC1</u>                                                                                                                  |
| 0.000264 | 0.000005 | 679.174377 | 1828.09009 | 1.3291131 | 0.007204 | <u>TOPORS</u>                                                                                                                |
| 0.998802 | 0.544082 | 63.934624  | 154.890472 | 1.3288498 | 0.048305 | <u>MYO19</u>                                                                                                                 |
| 0.994882 | 0.412734 | 70.223274  | 171.144409 | 1.3286029 | 0.045986 | <u>ABCB5</u>                                                                                                                 |
| 0.002427 | 0.000017 | 458.023438 | 1237.21155 | 1.3276148 | 0.008356 | <u>EMP3</u>                                                                                                                  |
| 0.000002 | 0.000001 | 2712.50488 | 6840.04004 | 1.3252428 | 0.005768 | <u>POLR2K</u>                                                                                                                |
| 0.000001 | 0.       | 9858.50977 | 23834.9668 | 1.3247648 | 0.005414 | <u>EXT1</u>                                                                                                                  |
| 0.000004 | 0.000001 | 2054.29272 | 5282.53027 | 1.3244846 | 0.005947 | <u>SOCS5</u>                                                                                                                 |
| 0.043737 | 0.000138 | 284.037415 | 762.022888 | 1.3234297 | 0.011132 | <u>PTGER1</u>                                                                                                                |
| 0.532415 | 0.005094 | 155.120071 | 402.524017 | 1.3223836 | 0.017395 | <u>SPG20OS</u>                                                                                                               |
| 0.00004  | 0.000002 | 1011.4248  | 2639.83081 | 1.322194  | 0.006731 | <u>HNRNPU</u>                                                                                                                |
| 0.996961 | 0.419905 | 70.223274  | 170.188309 | 1.3210353 | 0.041401 | <u>SARS2</u>                                                                                                                 |
| 0.000047 | 0.000002 | 973.692871 | 2545.17554 | 1.3207045 | 0.006834 | <u>ZNF10</u>                                                                                                                 |
| 0.598223 | 0.00953  | 141.494659 | 363.323334 | 1.3206485 | 0.044296 | <u>PAF1</u>                                                                                                                  |
| 0.00001  | 0.000001 | 2299.55029 | 5842.81299 | 1.3198186 | 0.006449 | <u>PSMB3</u>                                                                                                                 |
| 0.000002 | 0.000001 | 2652.7627  | 6666.02734 | 1.3196234 | 0.005935 | <u>DUSP22</u>                                                                                                                |
| 0.000165 | 0.000004 | 743.109009 | 1975.33167 | 1.3192484 | 0.007349 | <u>TRNAU1AP</u>                                                                                                              |
| 0.190398 | 0.000761 | 209.621719 | 553.590027 | 1.3190735 | 0.013693 | <u>SLC46A3</u>                                                                                                               |
| 0.000001 | 0.       | 4091.81592 | 10226.5957 | 1.3183791 | 0.005783 | <u>PRDX2</u>                                                                                                                 |
| 0.160081 | 0.000604 | 218.006592 | 576.536804 | 1.3176681 | 0.013373 | <u>SP3</u>                                                                                                                   |
| 0.000001 | 0.       | 4225.97363 | 10545.9385 | 1.3175302 | 0.005793 | <u>ZNF655</u>                                                                                                                |
| 0.       | 0.       | 13623.3154 | 32587.2344 | 1.3162711 | 0.005599 | <u>BRD2</u>                                                                                                                  |
| 0.742003 | 0.016235 | 131.013565 | 332.727692 | 1.3161395 | 0.02105  | <u>HEXDC</u>                                                                                                                 |
|          |          |            |            |           |          | <u>previous</u>                                                                                                              |
|          |          |            |            |           |          | <u>version</u>                                                                                                               |
|          |          |            |            |           |          | <u>conserved</u>                                                                                                             |
| 0.723708 | 0.014649 | 133.109787 | 338.464386 | 1.3156105 | 0.020857 | <u>probe</u>                                                                                                                 |
| 0.017748 | 0.00007  | 329.106079 | 878.668823 | 1.3149675 | 0.010402 | <u>RPS6KB1</u>                                                                                                               |
| 0.007178 | 0.000036 | 382.559631 | 1022.08594 | 1.3146983 | 0.00964  | <u>ZMYM5</u>                                                                                                                 |

|          |          |            |            |           |          |                  |
|----------|----------|------------|------------|-----------|----------|------------------|
| 0.000001 | 0.       | 7372.39551 | 17661.3379 | 1.3143506 | 0.005742 | <u>GTF2H1</u>    |
| 0.998746 | 0.561322 | 63.934624  | 152.978241 | 1.3120225 | 0.048246 | <u>MAST4</u>     |
| 0.861376 | 0.038109 | 115.291946 | 287.790344 | 1.3100761 | 0.024641 | <u>RNF167</u>    |
| 0.025585 | 0.000092 | 311.288239 | 827.994751 | 1.309886  | 0.011107 | <u>ANKRD13C</u>  |
| 0.784837 | 0.021896 | 125.773026 | 316.473755 | 1.3089878 | 0.0226   | <u>CARKD</u>     |
| 0.012407 | 0.000062 | 403.52179  | 1074.67224 | 1.3089066 | 0.015033 | <u>REPS1</u>     |
| 0.76549  | 0.020753 | 126.821136 | 319.342102 | 1.30883   | 0.024283 | <u>LURAP1L</u>   |
| 0.004952 | 0.000028 | 407.714233 | 1086.14551 | 1.3087476 | 0.009622 | <u>SERAC1</u>    |
| 0.291279 | 0.001524 | 188.659546 | 491.442627 | 1.3084136 | 0.015668 | <u>HLX</u>       |
| 0.588362 | 0.007948 | 146.735199 | 374.796722 | 1.3082082 | 0.026336 | <u>PLEC</u>      |
| 0.07012  | 0.000239 | 257.834717 | 683.621521 | 1.3075809 | 0.012423 | <u>COMMD2</u>    |
| 0.000001 | 0.       | 4408.34473 | 10892.0518 | 1.3075001 | 0.006065 | <u>EIF1</u>      |
| 0.000002 | 0.000001 | 3031.13013 | 7542.78369 | 1.3074929 | 0.006217 | <u>MTCH1</u>     |
| 0.000006 | 0.000033 | 1758.7262  | 4525.2876  | 1.3069957 | 0.019775 | <u>ELF1</u>      |
| 0.000038 | 0.000002 | 1022.95398 | 2640.78711 | 1.306878  | 0.007218 | <u>TRRAP</u>     |
|          |          |            |            |           |          | <u>previous</u>  |
|          |          |            |            |           |          | <u>version</u>   |
|          |          |            |            |           |          | <u>conserved</u> |
| 0.559369 | 0.006265 | 151.975739 | 389.138428 | 1.3067058 | 0.018949 | <u>probe</u>     |
| 0.369745 | 0.002385 | 176.082245 | 456.066406 | 1.306165  | 0.016666 | <u>GFRA1</u>     |
| 0.182915 | 0.000507 | 226.391449 | 594.702942 | 1.3046524 | 0.018886 | <u>KCTD11</u>    |
| 0.000051 | 0.000003 | 954.826904 | 2471.55493 | 1.3041234 | 0.007421 | <u>IKBKAP</u>    |
| 0.01293  | 0.000057 | 346.92395  | 919.781738 | 1.3041151 | 0.010617 | <u>TYW5</u>      |
| 0.023605 | 0.000091 | 313.38446  | 829.906982 | 1.3032818 | 0.011265 | <u>XIAP</u>      |
| 0.00566  | 0.000032 | 398.28125  | 1054.59375 | 1.3010297 | 0.010066 | <u>LMCD1</u>     |
| 0.947254 | 0.112639 | 96.425987  | 235.204056 | 1.3006206 | 0.033735 | <u>RNF41</u>     |
| 0.000926 | 0.000011 | 539.77594  | 1430.34668 | 1.3003087 | 0.008887 | <u>ZRANB1</u>    |
|          |          |            |            |           |          | <u>previous</u>  |
|          |          |            |            |           |          | <u>version</u>   |
|          |          |            |            |           |          | <u>conserved</u> |
| 0.002181 | 0.000016 | 474.793182 | 1258.24609 | 1.3001785 | 0.009492 | <u>probe</u>     |
| 0.391977 | 0.002745 | 172.937912 | 445.549164 | 1.300049  | 0.017399 | <u>SETD2</u>     |
| 0.000003 | 0.000001 | 2242.95239 | 5635.33643 | 1.2999388 | 0.006622 | <u>STXBP5</u>    |
| 0.541343 | 0.005901 | 154.07196  | 392.962891 | 1.2993345 | 0.019304 | <u>PBX4</u>      |
|          |          |            |            |           |          | <u>ANKHD1-</u>   |
| 0.207474 | 0.000931 | 205.429276 | 534.467773 | 1.2991993 | 0.015167 | <u>EIF4EBP3</u>  |
| 0.000048 | 0.000002 | 968.452332 | 2495.45776 | 1.2987126 | 0.007589 | <u>UHRF1BP1</u>  |
| 0.000237 | 0.000005 | 694.895996 | 1828.09009 | 1.2970956 | 0.008323 | <u>BRK1</u>      |
| 0.008079 | 0.000041 | 375.22287  | 990.53418  | 1.2970408 | 0.010541 | <u>FHIT</u>      |
| 0.000002 | 0.000001 | 2675.82129 | 6616.30908 | 1.2958037 | 0.006645 | <u>HEXB</u>      |
| 0.002007 | 0.000008 | 586.940796 | 1548.90479 | 1.2945065 | 0.010462 | <u>CREBBP</u>    |
| 0.99233  | 0.314699 | 77.560036  | 185.48613  | 1.293943  | 0.040642 | <u>ZNF260</u>    |
| 0.172974 | 0.000724 | 214.862259 | 558.370605 | 1.2936257 | 0.01521  | <u>TOMM22</u>    |
| 0.000025 | 0.000002 | 1140.34216 | 2915.19165 | 1.2935114 | 0.007535 | <u>GRPEL2</u>    |
| 0.       | 0.       | 11424.3838 | 26966.2402 | 1.2926543 | 0.006293 | <u>SLC25A3</u>   |
| 0.009889 | 0.000012 | 516.717529 | 1361.50647 | 1.2920657 | 0.013964 | <u>USP43</u>     |
| 0.000065 | 0.000003 | 903.469604 | 2327.18164 | 1.291341  | 0.007979 | <u>BZW1</u>      |
| 0.000017 | 0.000001 | 1327.95361 | 3392.29272 | 1.2910519 | 0.007501 | <u>PRDX2</u>     |
| 0.00136  | 0.000013 | 505.188324 | 1329.95459 | 1.2907537 | 0.009528 | <u>THAP1</u>     |
| 0.000141 | 0.000004 | 767.215454 | 1996.36609 | 1.2904442 | 0.00834  | <u>SLC1A4</u>    |
| 0.007676 | 0.00004  | 378.367188 | 994.358643 | 1.2902936 | 0.010825 | <u>LLPH</u>      |
| 0.000002 | 0.000001 | 3292.10913 | 8083.94434 | 1.2892571 | 0.006743 | <u>TNFRSF19</u>  |

|          |          |            |            |           |          | <u>previous</u>  |
|----------|----------|------------|------------|-----------|----------|------------------|
|          |          |            |            |           |          | <u>version</u>   |
|          |          |            |            |           |          | <u>conserved</u> |
| 0.00246  | 0.000019 | 456.975342 | 1201.83533 | 1.2891353 | 0.00999  | <u>probe</u>     |
| 0.000002 | 0.000001 | 3059.42896 | 7511.23193 | 1.2878887 | 0.006822 | <u>SPAG7</u>     |
| 0.939676 | 0.093971 | 100.618423 | 243.809082 | 1.287758  | 0.031185 | <u>YTHDC1</u>    |
| 0.099877 | 0.000357 | 243.161194 | 633.903625 | 1.2873816 | 0.014586 | <u>PRKY</u>      |
| 0.008946 | 0.000046 | 368.934204 | 966.631287 | 1.2860012 | 0.011178 | <u>PCCB</u>      |
| 0.00027  | 0.000006 | 674.981934 | 1764.98657 | 1.2851705 | 0.008856 | <u>NF2</u>       |
| 0.980906 | 0.21003  | 85.944901  | 205.564514 | 1.2846827 | 0.038022 | <u>ZNF322</u>    |
| 0.004441 | 0.000028 | 415.050995 | 1088.05774 | 1.2846192 | 0.010657 | <u>MRPS15</u>    |
| 0.052972 | 0.000021 | 447.542358 | 1173.15198 | 1.2843478 | 0.026399 | <u>RBM34</u>     |
| 0.661047 | 0.012568 | 139.398438 | 348.025513 | 1.2836806 | 0.025066 | <u>ITGAV</u>     |
| 0.784866 | 0.024721 | 125.773026 | 310.737061 | 1.2835509 | 0.025429 | <u>LARP1</u>     |
| 0.043195 | 0.000163 | 281.941193 | 736.207825 | 1.2832793 | 0.013104 | <u>NLGN3</u>     |
|          |          |            |            |           |          | NDUFAF4 ND       |
| 0.000658 | 0.000009 | 573.315369 | 1501.09912 | 1.2831403 | 0.009422 | UFAF4P1          |
| 0.012696 | 0.00006  | 347.972046 | 909.264465 | 1.2825127 | 0.011694 | <u>ZC3H7A</u>    |
| 0.96179  | 0.135067 | 94.329773  | 226.59903  | 1.2819821 | 0.034174 | <u>CCDC124</u>   |
|          |          |            |            |           |          | GPR89A GPR       |
| 0.000046 | 0.000002 | 985.222046 | 2505.97485 | 1.280991  | 0.008246 | 89C GPR89B       |
| 0.913656 | 0.07691  | 104.81086  | 253.370224 | 1.2808257 | 0.032563 | <u>BST1</u>      |
| 0.000024 | 0.000002 | 1144.53455 | 2897.02563 | 1.2792291 | 0.00804  | <u>TSC22D2</u>   |
| 0.000037 | 0.000002 | 1031.33887 | 2611.14746 | 1.278554  | 0.008237 | <u>BEX4</u>      |
| 0.335019 | 0.002239 | 181.322784 | 460.846985 | 1.2762519 | 0.018498 | <u>ANKRD32</u>   |
| 0.377011 | 0.002822 | 175.034134 | 443.636932 | 1.2753353 | 0.019124 | <u>ZNF513</u>    |
| 0.010074 | 0.000003 | 843.727417 | 2158.90552 | 1.2746587 | 0.019449 | <u>SACS</u>      |
| 0.302742 | 0.002148 | 186.563324 | 474.232574 | 1.2739679 | 0.019696 | <u>NMT1</u>      |
| 0.000035 | 0.000002 | 1047.06042 | 2639.83081 | 1.2737478 | 0.008401 | <u>DDA1</u>      |
| 0.000002 | 0.000001 | 3156.90308 | 7670.90283 | 1.2732383 | 0.007301 | <u>TPR</u>       |
|          |          |            |            |           |          | NBPF15 NBP       |
|          |          |            |            |           |          | F14 NBPF11       |
|          |          |            |            |           |          | NBPF8 LOC        |
|          |          |            |            |           |          | 100288142        |
|          |          |            |            |           |          | LOC1010602       |
|          |          |            |            |           |          | 02 NBPF24        |
|          |          |            |            |           |          | NBPF16 LOC       |
|          |          |            |            |           |          | 101060684        |
|          |          |            |            |           |          | NBPF12 LOC       |
|          |          |            |            |           |          | 101060362        |
|          |          |            |            |           |          | LOC1010602       |
|          |          |            |            |           |          | 26 LOC1009       |
|          |          |            |            |           |          | 96575 LOC1       |
| 0.000008 | 0.000001 | 1581.59583 | 3993.68848 | 1.2728093 | 0.007851 | 01060238         |
| 0.       | 0.       | 11489.3662 | 26733.9043 | 1.2725671 | 0.00693  | UBC UBA52        |
| 0.085111 | 0.000334 | 248.401733 | 641.552551 | 1.2720196 | 0.014914 | <u>ZBTB26</u>    |
| 0.000053 | 0.000003 | 948.538269 | 2401.75854 | 1.27047   | 0.008709 | <u>MBTD1</u>     |
| 0.216553 | 0.001115 | 203.333069 | 518.213806 | 1.2702413 | 0.017342 | <u>QRICH1</u>    |
| 0.809283 | 0.030419 | 122.6287   | 299.263702 | 1.2699939 | 0.027169 | <u>UFM1</u>      |
| 0.000001 | 0.000001 | 3522.69287 | 8528.53711 | 1.2695448 | 0.007372 | <u>DDB2</u>      |
| 0.977463 | 0.197696 | 88.041122  | 208.432861 | 1.2686355 | 0.038756 | <u>GMPPA</u>     |
| 0.541249 | 0.006758 | 154.07196  | 384.357849 | 1.268547  | 0.022054 | <u>EDEM2</u>     |
| 0.130064 | 0.000555 | 228.487671 | 585.141785 | 1.2670516 | 0.016273 | <u>TRAM2</u>     |
| 0.000002 | 0.000001 | 2821.5083  | 6831.43506 | 1.2663045 | 0.007615 | <u>PPP1R15B</u>  |

|          |          |            |            |           |          |                 |
|----------|----------|------------|------------|-----------|----------|-----------------|
| 0.958402 | 0.136216 | 95.377884  | 226.59903  | 1.2660405 | 0.036782 | <u>VAC14</u>    |
| 0.678916 | 0.014159 | 138.350327 | 340.376617 | 1.2643324 | 0.02471  | <u>SETD9</u>    |
|          |          |            |            |           |          | GTF2IRD2B       |
|          |          |            |            |           |          | GTF2IRD2 G      |
| 0.011007 | 0.000057 | 356.356903 | 919.781738 | 1.2640117 | 0.012569 | TF2IRD2P1       |
| 0.000001 | 0.       | 7808.40869 | 18054.3008 | 1.2637728 | 0.007305 | <u>NFE2L2</u>   |
| 0.000002 | 0.000001 | 2604.5498  | 6312.26514 | 1.2633861 | 0.007775 | <u>INPPL1</u>   |
| 0.925995 | 0.092089 | 102.714638 | 244.765198 | 1.2632975 | 0.034929 | <u>C2orf49</u>  |
| 0.930845 | 0.092099 | 102.714638 | 244.765198 | 1.2632975 | 0.033543 | <u>BRPF1</u>    |
| 0.001489 | 0.000002 | 1082.69617 | 2703.89062 | 1.2604219 | 0.013885 | <u>CA5A</u>     |
| 0.000001 | 0.       | 8648.99219 | 19935.9336 | 1.2584924 | 0.007469 | <u>DNAJB1</u>   |
| 0.000005 | 0.000001 | 1920.13489 | 4750.93066 | 1.2584354 | 0.008208 | <u>UFD1L</u>    |
| 0.000024 | 0.000002 | 1145.58264 | 2857.82495 | 1.2583391 | 0.008876 | <u>HPS5</u>     |
| 0.01965  | 0.000057 | 357.405029 | 918.825623 | 1.2580756 | 0.014997 | <u>NUAK2</u>    |
| 0.000092 | 0.000004 | 838.486877 | 2122.57324 | 1.2579594 | 0.009503 | <u>EIF5</u>     |
| 0.059109 | 0.00024  | 266.219574 | 682.665405 | 1.2568247 | 0.01526  | <u>RCOR3</u>    |
| 0.000001 | 0.       | 4885.23389 | 11572.8047 | 1.2567758 | 0.007693 | <u>EIF3I</u>    |
| 0.027061 | 0.000119 | 306.047699 | 784.969666 | 1.2559555 | 0.014124 | <u>FAM89B</u>   |
|          |          |            |            |           |          | NBPF8 LOC1      |
|          |          |            |            |           |          | 01060684 L      |
|          |          |            |            |           |          | OC10106036      |
|          |          |            |            |           |          | 2 LOC10099      |
|          |          |            |            |           |          | 6575 NBPF1      |
|          |          |            |            |           |          | 5 NBPF14 N      |
|          |          |            |            |           |          | BPF11 LOC1      |
|          |          |            |            |           |          | 00288142 L      |
|          |          |            |            |           |          | OC10106020      |
|          |          |            |            |           |          | 2 NBPF24 N      |
|          |          |            |            |           |          | BPF16 NBPF      |
|          |          |            |            |           |          | 12 LOC1010      |
| 0.000016 | 0.000002 | 1287.07739 | 3207.7627  | 1.2559106 | 0.008797 | 60238           |
| 0.000449 | 0.000008 | 614.19165  | 1577.58813 | 1.2556632 | 0.010466 | <u>QSOX1</u>    |
| 0.488673 | 0.005482 | 160.360611 | 397.743439 | 1.2549081 | 0.022457 | <u>CITED1</u>   |
| 0.541342 | 0.007182 | 154.07196  | 380.533386 | 1.2546416 | 0.023294 | <u>SCRN1</u>    |
| 0.002239 | 0.000018 | 480.033722 | 1232.43103 | 1.2545416 | 0.01182  | <u>STK17B</u>   |
| 0.000002 | 0.000001 | 3242.8479  | 7774.16357 | 1.2538923 | 0.007994 | <u>ETS2</u>     |
| 0.981469 | 0.231531 | 85.944901  | 200.783951 | 1.252897  | 0.042185 | <u>FOSL1</u>    |
| 0.801214 | 0.030983 | 123.676811 | 298.307587 | 1.252516  | 0.028909 | <u>GZMM</u>     |
| 0.000002 | 0.000001 | 2978.72461 | 7137.3916  | 1.2518776 | 0.008138 | <u>C16orf80</u> |
| 0.000009 | 0.000001 | 1526.04614 | 3790.03613 | 1.2493162 | 0.008827 | <u>PQBP1</u>    |
| 0.002428 | 0.000021 | 458.023438 | 1170.28357 | 1.2475319 | 0.012096 | <u>GNG11</u>    |
| 0.550144 | 0.00776  | 153.023849 | 375.752838 | 1.2475115 | 0.024282 | <u>NRP2</u>     |
| 0.000001 | 0.       | 5252.07227 | 12292.7588 | 1.2474427 | 0.008021 | <u>LAMTOR3</u>  |
| 0.042255 | 0.000181 | 282.989319 | 720.909973 | 1.2465231 | 0.015405 | <u>MLL</u>      |
| 0.000052 | 0.000003 | 951.682617 | 2370.20679 | 1.2460367 | 0.009768 | <u>TCEAL4</u>   |
| 0.921004 | 0.097618 | 104.81086  | 246.677429 | 1.2446636 | 0.04266  | <u>B3GNT9</u>   |
| 0.733097 | 0.022292 | 131.013565 | 315.517639 | 1.2422898 | 0.030479 | <u>CBL</u>      |
| 0.000011 | 0.       | 6141.9165  | 14146.6631 | 1.2422779 | 0.009682 | <u>ARHGEF2</u>  |
| 0.424297 | 0.004113 | 168.745483 | 416.865723 | 1.242124  | 0.023411 | <u>SEC61A2</u>  |
| 0.194525 | 0.002598 | 208.573608 | 522.038269 | 1.2418335 | 0.030734 | <u>STK19</u>    |
| 0.473215 | 0.008088 | 162.456833 | 399.65567  | 1.2416962 | 0.033696 | <u>ZNF623</u>   |
| 0.163602 | 0.000841 | 216.958481 | 544.02887  | 1.2410675 | 0.018772 | <u>HIPK2</u>    |
| 0.545273 | 0.008005 | 153.023849 | 373.840607 | 1.2404173 | 0.029403 | <u>HN1L</u>     |

|          |          |            |            |           |          |                  |
|----------|----------|------------|------------|-----------|----------|------------------|
|          |          |            |            |           |          | <u>previous</u>  |
|          |          |            |            |           |          | <u>version</u>   |
|          |          |            |            |           |          | <u>conserved</u> |
| 0.226508 | 0.001345 | 201.236847 | 501.959869 | 1.2400217 | 0.019989 | <u>probe</u>     |
| 0.5959   | 0.010163 | 147.78331  | 359.498871 | 1.2393662 | 0.025769 | <u>TCF12</u>     |
| 0.000013 | 0.000003 | 1374.07031 | 3385.59985 | 1.2388717 | 0.011738 | <u>CTSC</u>      |
| 0.812458 | 0.036699 | 121.580597 | 289.702545 | 1.2379833 | 0.032156 | <u>MCTP1</u>     |
| 0.00001  | 0.000001 | 1477.83313 | 3635.14575 | 1.2357895 | 0.00946  | <u>TMEM45A</u>   |
| 0.       | 0.       | 13936.7002 | 31475.2754 | 1.2356966 | 0.008247 | <u>RPL4</u>      |
| 0.847274 | 0.046142 | 117.388161 | 278.229187 | 1.2355117 | 0.032568 | <u>VPS16</u>     |
|          |          |            |            |           |          | CSDAP1   CSD     |
| 0.000188 | 0.000005 | 724.243042 | 1822.35339 | 1.2345154 | 0.01101  | A                |
| 0.921146 | 0.092089 | 104.81086  | 244.765198 | 1.2341513 | 0.036792 | <u>ZNF614</u>    |
|          |          |            |            |           |          | <u>previous</u>  |
|          |          |            |            |           |          | <u>version</u>   |
|          |          |            |            |           |          | <u>conserved</u> |
| 0.000006 | 0.000001 | 1807.9873  | 4421.07129 | 1.233558  | 0.009305 | <u>probe</u>     |
| 0.019452 | 0.000097 | 323.86554  | 817.477539 | 1.2316753 | 0.015283 | <u>DNAJC4</u>    |
| 0.001911 | 0.000019 | 476.889404 | 1204.70374 | 1.2312256 | 0.012836 | <u>ZC3HAV1</u>   |
| 0.0293   | 0.000138 | 301.855286 | 761.066772 | 1.2306127 | 0.015949 | <u>ARID4A</u>    |
| 0.568449 | 0.009229 | 150.927643 | 365.235565 | 1.2291513 | 0.026384 | <u>ZCCHC6</u>    |
| 0.06863  | 0.000311 | 258.882812 | 650.157532 | 1.2278822 | 0.017662 | <u>TTC3</u>      |
| 0.000005 | 0.000001 | 1944.24146 | 4707.90576 | 1.2274149 | 0.009503 | <u>HSPBAP1</u>   |
|          |          |            |            |           |          | <u>previous</u>  |
|          |          |            |            |           |          | <u>version</u>   |
|          |          |            |            |           |          | <u>conserved</u> |
| 0.973149 | 0.214018 | 89.089226  | 204.608414 | 1.2265459 | 0.0462   | <u>probe</u>     |
| 0.642019 | 0.013686 | 142.54277  | 342.288818 | 1.2264231 | 0.028094 | <u>ATF4</u>      |
|          |          |            |            |           |          | SVIL   SVILP     |
| 0.084425 | 0.000388 | 249.449844 | 624.342468 | 1.2262036 | 0.018351 | 1                |
| 0.002972 | 0.000026 | 443.349915 | 1114.82898 | 1.2244541 | 0.013662 | <u>UCHL3</u>     |
| 0.001637 | 0.000018 | 489.466705 | 1230.5188  | 1.2243199 | 0.013118 | <u>NSMCE4A</u>   |
| 0.632805 | 0.013613 | 143.590881 | 344.20105  | 1.2229549 | 0.028981 | <u>OAZ3</u>      |
| 0.033064 | 0.000158 | 295.56662  | 740.988403 | 1.2223473 | 0.016747 | <u>CYCS</u>      |
| 0.006504 | 0.000044 | 388.848297 | 976.192444 | 1.2220431 | 0.014594 | <u>PEX13</u>     |
| 0.000001 | 0.000001 | 3546.79932 | 8310.54297 | 1.2217489 | 0.009271 | <u>CCDC59</u>    |
| 0.001303 | 0.000015 | 509.380768 | 1277.36841 | 1.2207756 | 0.013145 | <u>CHCHD3</u>    |
| 0.000969 | 0.000013 | 535.583496 | 1342.38416 | 1.2201272 | 0.012938 | <u>FLJ31306</u>  |
|          |          |            |            |           |          | <u>previous</u>  |
|          |          |            |            |           |          | <u>version</u>   |
|          |          |            |            |           |          | <u>conserved</u> |
| 0.000004 | 0.000001 | 2061.62964 | 4944.06592 | 1.2197843 | 0.00982  | <u>probe</u>     |
| 0.000005 | 0.000001 | 1904.41333 | 4593.17188 | 1.2189738 | 0.009918 | <u>CD55</u>      |
| 0.715254 | 0.021128 | 134.157898 | 318.385986 | 1.218568  | 0.030675 | <u>SH3TC1</u>    |
| 0.006399 | 0.000044 | 389.896393 | 976.192444 | 1.2180192 | 0.014847 | <u>PHACTR4</u>   |
| 0.000003 | 0.000001 | 2383.39893 | 5642.02881 | 1.2174352 | 0.009766 | <u>RTFDC1</u>    |
| 0.000005 | 0.000001 | 2511.26807 | 5918.34619 | 1.2169332 | 0.010112 | <u>MRPS34</u>    |
| 0.000001 | 0.       | 7738.18555 | 17305.6641 | 1.2167971 | 0.009164 | <u>EAPP</u>      |
| 0.       | 0.       | 23231.3262 | 51651.1953 | 1.2166023 | 0.008986 | <u>HSPA1A</u>    |
| 0.000025 | 0.000002 | 1134.05347 | 2746.91577 | 1.2161099 | 0.010867 | <u>OTUD7B</u>    |
| 0.894081 | 0.078468 | 109.003296 | 252.414108 | 1.2156961 | 0.039447 | <u>FBXL20</u>    |
| 0.000136 | 0.000005 | 772.455994 | 1911.27197 | 1.2156886 | 0.011829 | <u>PAXBP1</u>    |
| 0.955184 | 0.152404 | 96.425987  | 220.86235  | 1.2156348 | 0.042965 | <u>DENND6A</u>   |
| 0.000001 | 0.       | 9700.24512 | 21704.7461 | 1.2155342 | 0.009167 | <u>SYNPO</u>     |

|          |          |            |            |           |          |                                                     |
|----------|----------|------------|------------|-----------|----------|-----------------------------------------------------|
| 0.000336 | 0.000007 | 647.731079 | 1617.745   | 1.2153967 | 0.012427 | <u>ABRACL</u>                                       |
| 0.861375 | 0.056085 | 115.291946 | 268.66806  | 1.2144703 | 0.036058 | <u>SLC30A6</u>                                      |
| 0.000157 | 0.000005 | 750.44574  | 1857.72961 | 1.2135829 | 0.012035 | <u>C1GALT1</u>                                      |
| 0.595891 | 0.011393 | 147.78331  | 352.806091 | 1.2132352 | 0.028712 | <u>TOMM34</u>                                       |
| 0.190359 | 0.001164 | 209.621719 | 514.389343 | 1.212779  | 0.021753 | <u>ENOSF1</u>                                       |
| 0.939721 | 0.124592 | 100.618423 | 230.423492 | 1.2114812 | 0.041823 | <u>PDE12</u>                                        |
| 0.       | 0.       | 11018.7656 | 24565.4375 | 1.2110412 | 0.009333 | <u>SPHK1</u>                                        |
| 0.000018 | 0.000002 | 1237.81628 | 2988.8125  | 1.2107791 | 0.010969 | <u>LAYN</u>                                         |
| 0.000003 | 0.000001 | 5399.85547 | 12305.1875 | 1.2106935 | 0.01112  | <u>UGCG</u>                                         |
| 0.085111 | 0.000422 | 248.401733 | 614.781311 | 1.2103299 | 0.019594 | <u>TRIP4</u>                                        |
| 0.000238 | 0.000006 | 691.751648 | 1717.18079 | 1.2097141 | 0.012522 | <u>MAPKAPK5</u>                                     |
| 0.000021 | 0.000002 | 1201.13245 | 2897.02563 | 1.2094638 | 0.011109 | <u>C2orf47</u>                                      |
| 0.010087 | 0.000063 | 361.597473 | 899.703308 | 1.2093839 | 0.015997 | <u>FAM46C</u>                                       |
| 0.112932 | 0.000593 | 234.776321 | 578.448975 | 1.2087373 | 0.020479 | <u>KLHL28</u>                                       |
| 0.914903 | 0.095865 | 105.858963 | 242.852966 | 1.2083417 | 0.040572 | <u>DIMT1</u>                                        |
| 0.000041 | 0.000003 | 1003.03992 | 2427.57349 | 1.2083148 | 0.011549 | <u>BIRC6</u>                                        |
| 0.000006 | 0.000001 | 1795.41003 | 4318.76709 | 1.2079771 | 0.010524 | <u>AEN</u>                                          |
| 0.000007 | 0.000001 | 1654.9635  | 3995.60059 | 1.2079552 | 0.010636 | <u>MVP</u>                                          |
| 0.000001 | 0.000001 | 3907.34888 | 9056.3125  | 1.2072825 | 0.009879 | <u>FAM50A</u>                                       |
| 0.000001 | 0.000001 | 3994.3418  | 9253.27148 | 1.2068755 | 0.009885 | <u>LAMTOR3</u>                                      |
| 0.887525 | 0.072446 | 111.09951  | 256.238556 | 1.2068507 | 0.038517 | <u>KDM6A</u>                                        |
| 0.00196  | 0.000005 | 756.734375 | 1863.46631 | 1.2065248 | 0.017109 | <u>RNF139</u>                                       |
| 0.23671  | 0.001057 | 213.814148 | 522.994385 | 1.2064013 | 0.033693 | <u>RSF1</u>                                         |
| 0.715266 | 0.022296 | 134.157898 | 315.517639 | 1.2059843 | 0.032277 | <u>FRMD3</u>                                        |
| 0.215637 | 0.00136  | 205.429276 | 501.003754 | 1.2056208 | 0.023934 | <u>ANKMY2</u>                                       |
| 0.       | 0.       | 12639.1416 | 27994.0625 | 1.20549   | 0.00956  | <u>KLHL21</u>                                       |
|          |          |            |            |           |          | IP011-<br>LRRC70 IP0                                |
| 0.899508 | 0.081667 | 109.003296 | 250.501877 | 1.2054237 | 0.039492 | 11                                                  |
| 0.784811 | 0.03402  | 125.773026 | 293.527008 | 1.2043231 | 0.034501 | <u>ATP2B1</u>                                       |
| 0.05926  | 0.000112 | 320.721222 | 794.530762 | 1.2039424 | 0.02621  | <u>STAT6</u>                                        |
| 0.020996 | 0.000114 | 319.673126 | 791.662415 | 1.2034605 | 0.017475 | <u>HIST1H2BD</u>                                    |
| 0.595855 | 0.011971 | 147.78331  | 349.937744 | 1.2018838 | 0.030099 | <u>PIBF1</u>                                        |
|          |          |            |            |           |          | LOC1010607<br>69 MAFIP T<br>EKT4P2 LOC<br>100233156 |
| 0.341743 | 0.003172 | 180.274673 | 435.031891 | 1.2017165 | 0.02552  | TEKT4                                               |
| 0.000005 | 0.000001 | 1897.07654 | 4523.37549 | 1.2012637 | 0.010799 | <u>NUP98</u>                                        |
| 0.002583 | 0.000025 | 453.831024 | 1122.47791 | 1.2006982 | 0.015194 | <u>SURF2</u>                                        |
|          |          |            |            |           |          | previous<br>version<br>conserved                    |
| 0.000003 | 0.000001 | 2398.07251 | 5609.521   | 1.2002123 | 0.010602 | probe                                               |
| 0.003213 | 0.000029 | 437.061279 | 1080.40894 | 1.1998389 | 0.015359 | <u>TEX30</u>                                        |
| 0.000453 | 0.000008 | 621.528381 | 1535.51917 | 1.1996659 | 0.01365  | <u>SH2D4A</u>                                       |
| 0.000113 | 0.000004 | 801.80304  | 1957.16553 | 1.1990528 | 0.012675 | <u>ARG2</u>                                         |
| 0.003214 | 0.000029 | 437.061279 | 1079.45276 | 1.198564  | 0.01545  | <u>NDUFV3</u>                                       |
| 0.930794 | 0.117276 | 102.714638 | 233.291824 | 1.1984453 | 0.043078 | <u>CHRNB1</u>                                       |
| 0.000001 | 0.       | 6728.85693 | 14948.8428 | 1.1984147 | 0.010061 | <u>TCEB1</u>                                        |
| 0.833468 | 0.050845 | 118.436272 | 273.448608 | 1.1978048 | 0.0391   | <u>ZNRF3</u>                                        |
| 0.001538 | 0.000018 | 494.707245 | 1220.95764 | 1.1977721 | 0.014773 | <u>PPM1B</u>                                        |
| 0.002748 | 0.000028 | 448.590485 | 1107.18005 | 1.1976411 | 0.01567  | <u>FAM118B</u>                                      |
| 0.000001 | 0.000001 | 4275.23486 | 9819.29102 | 1.1970164 | 0.01037  | <u>CYR61</u>                                        |

|          |          |            |            |           |          |                            |
|----------|----------|------------|------------|-----------|----------|----------------------------|
| 0.240835 | 0.001777 | 198.092514 | 479.013153 | 1.1964669 | 0.024325 | <u>SLC50A1</u>             |
|          |          |            |            |           |          | <u>previous</u>            |
|          |          |            |            |           |          | <u>version</u>             |
|          |          |            |            |           |          | <u>conserved</u>           |
| 0.012469 | 0.000077 | 349.020142 | 860.502625 | 1.1960935 | 0.01728  | <u>probe</u>               |
| 0.       | 0.       | 20834.3027 | 45794.0391 | 1.1960004 | 0.009932 | <u>C6orf48</u>             |
| 0.505965 | 0.007759 | 158.264389 | 375.752838 | 1.1959644 | 0.029101 | <u>CNTRL</u>               |
| 0.003407 | 0.00003  | 432.868835 | 1067.02332 | 1.1957484 | 0.015716 | <u>MAG1</u>                |
| 0.014419 | 0.000086 | 340.635284 | 839.46814  | 1.1956619 | 0.017523 | <u>TERF2</u>               |
| 0.000132 | 0.000004 | 808.091736 | 1966.72656 | 1.1954201 | 0.013103 | <u>CWC15</u>               |
| 0.000039 | 0.000002 | 1074.31128 | 2567.16626 | 1.1948667 | 0.01235  | <u>C3</u>                  |
| 0.138342 | 0.000717 | 229.535782 | 559.326721 | 1.1947259 | 0.023771 | <u>FBXO3</u>               |
| 0.143572 | 0.00085  | 223.247131 | 543.072754 | 1.1946742 | 0.022527 | <u>EPS8L2</u>              |
| 0.001086 | 0.000015 | 525.102417 | 1291.71008 | 1.1931384 | 0.014768 | <u>RCHY1</u>               |
| 0.000007 | 0.000001 | 1680.11804 | 4012.81079 | 1.1929667 | 0.011405 | <u>INTS6</u>               |
| 0.081509 | 0.000429 | 250.497955 | 612.86908  | 1.1929256 | 0.021043 | <u>DENND1A</u>             |
|          |          |            |            |           |          | <u>BSCL2</u>   <u>HNRN</u> |
| 0.000024 | 0.000002 | 1145.58264 | 2729.70557 | 1.1924629 | 0.012135 | <u>PUL2-BSCL2</u>          |
| 0.000007 | 0.000001 | 1665.44458 | 3977.43457 | 1.1924232 | 0.01145  | <u>HARS</u>                |
| 0.000002 | 0.000001 | 2725.08228 | 6284.5376  | 1.1918682 | 0.010915 | <u>WTAP</u>                |
| 0.044983 | 0.000223 | 281.941193 | 692.226562 | 1.1917249 | 0.020018 | <u>WDR20</u>               |
| 0.000003 | 0.000001 | 2504.97949 | 5804.56836 | 1.1911699 | 0.011029 | <u>MATR3</u>               |
| 0.000077 | 0.000004 | 876.21875  | 2114.92432 | 1.1909692 | 0.012924 | <u>CDC42EP2</u>            |
| 0.000001 | 0.       | 5262.55322 | 11858.6826 | 1.1907798 | 0.010537 | <u>ZZZ3</u>                |
| 0.000126 | 0.000002 | 1224.1908  | 2913.27954 | 1.1900147 | 0.014166 | <u>BRIX1</u>               |
| 0.000001 | 0.000001 | 3930.40723 | 9001.81348 | 1.1899178 | 0.010737 | <u>PRDX4</u>               |
| 0.000008 | 0.000001 | 1601.50989 | 3813.93896 | 1.1885806 | 0.011715 | <u>PDCD6</u>               |
| 0.00257  | 0.000026 | 453.831024 | 1112.91675 | 1.1883802 | 0.015952 | <u>MRPL32</u>              |
| 0.010266 | 0.000068 | 360.549347 | 884.405518 | 1.1882341 | 0.017631 | <u>UBE2L6</u>              |
| 0.000001 | 0.000001 | 3723.92969 | 8518.02051 | 1.1872325 | 0.010912 | <u>MT1X</u>                |
| 0.       | 0.       | 12576.2549 | 27490.1914 | 1.1867359 | 0.010468 | <u>RPL5</u>                |
| 0.887535 | 0.078456 | 111.09951  | 252.414108 | 1.1865369 | 0.041674 | <u>PPAN</u>                |
| 0.001538 | 0.000019 | 494.707245 | 1211.39648 | 1.1864514 | 0.015565 | <u>SMURF2</u>              |
| 0.000001 | 0.       | 7832.51562 | 17145.0371 | 1.1864069 | 0.010609 | <u>SNHG1</u>               |
| 0.000002 | 0.000001 | 3341.37012 | 7646.04395 | 1.1861894 | 0.011045 | <u>RUNX1</u>               |
| 0.000012 | 0.000001 | 1407.60986 | 3343.53076 | 1.1860562 | 0.012103 | <u>FAM168B</u>             |
| 0.000089 | 0.000004 | 843.727417 | 2033.65454 | 1.1851564 | 0.01337  | <u>ALDH1A3</u>             |
| 0.000003 | 0.000001 | 2424.27515 | 5609.521   | 1.18513   | 0.011386 | <u>GGH</u>                 |
| 0.000001 | 0.       | 10403.5254 | 22787.0664 | 1.1847903 | 0.010615 | <u>SRSF3</u>               |
| 0.000091 | 0.000004 | 840.583069 | 2026.00574 | 1.184737  | 0.013408 | <u>KLHL20</u>              |
| 0.471678 | 0.006861 | 162.456833 | 383.401733 | 1.1839622 | 0.029898 | <u>SSH1</u>                |
|          |          |            |            |           |          | <u>previous</u>            |
|          |          |            |            |           |          | <u>version</u>             |
|          |          |            |            |           |          | <u>conserved</u>           |
| 0.       | 0.       | 14136.8887 | 30760.1016 | 1.1834558 | 0.010613 | <u>probe</u>               |
| 0.688079 | 0.021127 | 137.302231 | 318.385986 | 1.1831036 | 0.034651 | <u>PRDM6</u>               |
| 0.000216 | 0.000006 | 704.328979 | 1715.26855 | 1.1828358 | 0.014143 | <u>HERPUD2</u>             |
| 0.005864 | 0.000044 | 400.377472 | 979.060791 | 1.1827256 | 0.017565 | <u>ACAT2</u>               |
| 0.000344 | 0.000006 | 696.992188 | 1698.05859 | 1.1823853 | 0.014786 | <u>LSG1</u>                |
| 0.078239 | 0.000418 | 253.642273 | 615.737427 | 1.1805412 | 0.022313 | <u>LINC00472</u>           |
| 0.000916 | 0.000014 | 540.824036 | 1318.48132 | 1.1802523 | 0.015516 | <u>ME1</u>                 |

|          |          |            |            |           |          |                  |
|----------|----------|------------|------------|-----------|----------|------------------|
|          |          |            |            |           |          | <u>previous</u>  |
|          |          |            |            |           |          | <u>version</u>   |
|          |          |            |            |           |          | <u>conserved</u> |
| 0.000002 | 0.000001 | 2814.17163 | 6431.7793  | 1.1801378 | 0.011518 | <u>probe</u>     |
| 0.000018 | 0.000002 | 1235.71997 | 2919.97241 | 1.1797616 | 0.012716 | <u>LPIN1</u>     |
| 0.002038 | 0.000023 | 471.648865 | 1147.33691 | 1.1768598 | 0.016564 | <u>HIST1H2BD</u> |
| 0.000001 | 0.       | 5246.83154 | 11703.792  | 1.1751883 | 0.011363 | <u>ATP6V1C1</u>  |
| 0.874801 | 0.073906 | 113.195724 | 255.282455 | 1.1731866 | 0.043095 | <u>KLHDC4</u>    |
| 0.000151 | 0.000005 | 756.734375 | 1822.35339 | 1.1731155 | 0.014522 | <u>CCDC85A</u>   |
| 0.000017 | 0.000004 | 1270.30762 | 2987.85645 | 1.1728685 | 0.015825 | <u>NDUFB9</u>    |
| 0.186294 | 0.00133  | 210.66983  | 502.915985 | 1.1724782 | 0.02579  | <u>BEND6</u>     |
| 0.077549 | 0.000433 | 253.642273 | 611.912964 | 1.1715236 | 0.02311  | <u>CHCHD6</u>    |
| 0.000769 | 0.000013 | 559.690002 | 1355.76978 | 1.1711004 | 0.01604  | <u>ZFX</u>       |
| 0.000012 | 0.000002 | 1380.35901 | 3244.09497 | 1.1709515 | 0.013022 | <u>NOL10</u>     |
| 0.235768 | 0.001908 | 199.140625 | 473.276459 | 1.1709315 | 0.027005 | <u>DUSP16</u>    |
| 0.290577 | 0.002709 | 188.659546 | 446.505249 | 1.1696274 | 0.028238 | <u>CAMK1</u>     |
| 0.       | 0.       | 11491.4629 | 24844.623  | 1.1687966 | 0.011439 | <u>JDP2</u>      |
| 0.000306 | 0.000008 | 659.260315 | 1593.84216 | 1.1685895 | 0.015388 | <u>RAD9A</u>     |
| 0.000306 | 0.000008 | 659.260315 | 1593.84216 | 1.1685895 | 0.015387 | <u>CHMP1B</u>    |
| 0.000051 | 0.000003 | 956.923157 | 2262.16577 | 1.1684875 | 0.014075 | <u>MRPL54</u>    |
| 0.903946 | 0.10005  | 107.955185 | 240.940735 | 1.1676463 | 0.04673  | <u>CGGBP1</u>    |
| 0.55032  | 0.011024 | 153.023849 | 354.718323 | 1.1674076 | 0.033649 | <u>NR2C1</u>     |
| 0.186798 | 0.001034 | 220.102798 | 524.906616 | 1.1672004 | 0.031405 | <u>FER</u>       |
| 0.000001 | 0.       | 9148.93945 | 19760.0098 | 1.1661102 | 0.011651 | <u>ASNS</u>      |
| 0.39185  | 0.004949 | 172.937912 | 404.436249 | 1.1623734 | 0.031104 | <u>CCT5</u>      |
| 0.007258 | 0.000042 | 408.76236  | 985.753601 | 1.1618683 | 0.020262 | <u>SNRNP25</u>   |
| 0.000081 | 0.000004 | 861.545227 | 2041.30347 | 1.1615398 | 0.014873 | <u>NUFIP1</u>    |
| 0.926102 | 0.12712  | 103.762749 | 229.467377 | 1.1614704 | 0.049049 | <u>SAMD12</u>    |
| 0.000001 | 0.       | 6095.79932 | 13309.1074 | 1.1611442 | 0.012088 | <u>PSMD12</u>    |
| 0.000058 | 0.000003 | 928.624207 | 2188.54517 | 1.1609402 | 0.014676 | <u>MAP2K4</u>    |
| 0.       | 0.       | 11510.3281 | 24715.5488 | 1.1591667 | 0.011984 | <u>BAX</u>       |
| 0.559369 | 0.011973 | 151.975739 | 349.937744 | 1.1590614 | 0.035008 | <u>UNG</u>       |
| 0.00038  | 0.000009 | 633.057556 | 1520.22131 | 1.1588159 | 0.016299 | <u>ADO</u>       |
| 0.521613 | 0.010014 | 156.168182 | 360.454987 | 1.1585796 | 0.039022 | <u>PHLPP1</u>    |
|          |          |            |            |           |          | SBDS SBDSP       |
| 0.000001 | 0.       | 7510.74609 | 16150.6787 | 1.1581541 | 0.012179 | 1                |
| 0.000077 | 0.000002 | 1415.99463 | 3297.63745 | 1.1576213 | 0.016002 | <u>ABL2</u>      |
| 0.000003 | 0.000001 | 2395.97632 | 5446.98193 | 1.1571308 | 0.013037 | <u>PARL</u>      |
| 0.463292 | 0.008963 | 163.504944 | 378.621155 | 1.1566707 | 0.037779 | <u>GON4L</u>     |
| 0.000033 | 0.000003 | 1058.58972 | 2466.77417 | 1.1564374 | 0.014609 | <u>PPHLN1</u>    |
| 0.000001 | 0.       | 7529.61182 | 16165.9766 | 1.1560086 | 0.012303 | <u>ARID5B</u>    |
| 0.801263 | 0.046154 | 123.676811 | 278.229187 | 1.1556252 | 0.042474 | <u>KLHL2</u>     |
| 0.678895 | 0.022696 | 138.350327 | 314.561523 | 1.1546585 | 0.0386   | <u>BRWD3</u>     |
| 0.008429 | 0.000064 | 373.126648 | 894.922729 | 1.1545465 | 0.020254 | <u>PPP2R2D</u>   |
| 0.000202 | 0.000006 | 713.761963 | 1703.79529 | 1.1541719 | 0.016107 | <u>CDC5L</u>     |
|          |          |            |            |           |          | <u>previous</u>  |
|          |          |            |            |           |          | <u>version</u>   |
|          |          |            |            |           |          | <u>conserved</u> |
| 0.000002 | 0.000001 | 2607.69409 | 5876.27686 | 1.1538937 | 0.013147 | <u>probe</u>     |
| 0.005451 | 0.000047 | 400.377472 | 958.982422 | 1.1519281 | 0.019828 | <u>CWC27</u>     |
| 0.000001 | 0.000001 | 3909.44507 | 8723.58496 | 1.1516973 | 0.012916 | <u>GSTP1</u>     |
| 0.269603 | 0.002541 | 192.851974 | 451.285828 | 1.1513126 | 0.030475 | <u>TBCEL</u>     |
| 0.004006 | 0.000038 | 421.339661 | 1008.70032 | 1.1513086 | 0.019465 | <u>PTPN1</u>     |
| 0.000002 | 0.000001 | 3273.24316 | 7309.4917  | 1.1501303 | 0.013157 | <u>RAE1</u>      |



|          |          |            |            |           |          |                      |
|----------|----------|------------|------------|-----------|----------|----------------------|
| 0.000019 | 0.000002 | 1218.95032 | 2818.62427 | 1.1487754 | 0.014768 | <u>METAP2</u>        |
| 0.000003 | 0.000001 | 2167.48853 | 4937.37305 | 1.1482498 | 0.01373  | <u>RASSF1</u>        |
| 0.00488  | 0.000034 | 434.965057 | 1036.42761 | 1.1458432 | 0.021014 | <u>UBQLN1</u>        |
| 0.       | 0.       | 14129.5518 | 29916.8086 | 1.1448944 | 0.012793 | FAM21A FAM21B FAM21C |
| 0.51472  | 0.010164 | 157.216293 | 359.498871 | 1.1446467 | 0.036121 | <u>ATG4D</u>         |
| 0.660521 | 0.023496 | 140.446548 | 317.429871 | 1.1442605 | 0.042911 | <u>WDR20</u>         |
| 0.064352 | 0.000398 | 262.02713  | 621.474121 | 1.1440539 | 0.025375 | <u>TMEM184A</u>      |
| 0.000002 | 0.000001 | 3231.31885 | 7185.19727 | 1.1436987 | 0.013593 | <u>KLF3</u>          |
| 0.582916 | 0.015424 | 147.78331  | 335.596039 | 1.1436951 | 0.047932 | <u>C1orf216</u>      |
| 0.000024 | 0.000002 | 1165.4967  | 2683.81226 | 1.1432004 | 0.015364 | <u>HNRPLL</u>        |
| 0.000004 | 0.000001 | 2012.36841 | 4595.08398 | 1.1430758 | 0.014179 | <u>MED13L</u>        |
| 0.037347 | 0.000236 | 289.277954 | 686.489868 | 1.1409538 | 0.024422 | <u>MARS</u>          |
| 0.007546 | 0.000062 | 379.415314 | 901.61554  | 1.1406362 | 0.021363 | <u>LTBR</u>          |
| 0.000421 | 0.00001  | 621.528381 | 1471.45947 | 1.1383029 | 0.018033 | <u>ATM</u>           |
| 0.070733 | 0.000437 | 258.882812 | 610.956909 | 1.1378778 | 0.026633 | <u>GOSR2</u>         |
| 0.000457 | 0.00001  | 612.095398 | 1448.51282 | 1.1376635 | 0.018169 | <u>MZB1</u>          |
| 0.014239 | 0.000102 | 341.683411 | 809.828613 | 1.1376434 | 0.022745 | <u>PCYOX1</u>        |
| 0.847277 | 0.068255 | 117.388161 | 259.106903 | 1.1376016 | 0.04776  | <u>CYHR1</u>         |
| 0.002261 | 0.000026 | 470.600739 | 1112.91675 | 1.1361982 | 0.020239 | <u>CDC42EP1</u>      |
| 0.832481 | 0.06184  | 119.484375 | 263.887482 | 1.135203  | 0.047447 | <u>ZFP64</u>         |
| 0.697202 | 0.027222 | 136.25412  | 305.000397 | 1.1351099 | 0.042272 | <u>GALNT11</u>       |
| 0.000081 | 0.000004 | 902.421509 | 2093.88989 | 1.1347751 | 0.016992 | <u>UBTD1</u>         |
| 0.12595  | 0.000949 | 229.535782 | 536.380005 | 1.1340977 | 0.029234 | <u>LONRF3</u>        |
| 0.000991 | 0.000016 | 533.487244 | 1259.20215 | 1.133653  | 0.01934  | <u>USP20</u>         |
| 0.       | 0.       | 29937.125  | 62638.8555 | 1.13321   | 0.013417 | <u>IER3</u>          |
| 0.793085 | 0.047968 | 124.724922 | 276.316956 | 1.1331173 | 0.046031 | <u>DDX31</u>         |
| 0.651287 | 0.021508 | 141.494659 | 317.429871 | 1.1328789 | 0.04131  | <u>SPTLC1</u>        |
| 0.000005 | 0.000001 | 1812.17969 | 4139.01758 | 1.1324274 | 0.015088 | ZFAND6 ATP8B5P       |
| 0.801264 | 0.050837 | 123.676811 | 273.448608 | 1.1315254 | 0.046646 | <u>PIP5K1C</u>       |
| 0.000002 | 0.000001 | 2572.05835 | 5715.6499  | 1.1312389 | 0.014674 | <u>RAPGEF2</u>       |
| 0.000015 | 0.000002 | 1317.47253 | 3009.84692 | 1.1307064 | 0.015888 | <u>APOPT1</u>        |
| 0.000001 | 0.       | 5087.51904 | 11037.3809 | 1.1297872 | 0.014165 | <u>CDK7</u>          |
| 0.678734 | 0.025301 | 138.350327 | 308.824829 | 1.1290654 | 0.042812 | <u>ANKRD33B</u>      |
| 0.125954 | 0.000931 | 229.535782 | 534.467773 | 1.1289289 | 0.029389 | <u>COLEC12</u>       |
| 0.000876 | 0.000015 | 545.016479 | 1282.14893 | 1.12891   | 0.019628 | <u>ASB1</u>          |
| 0.004592 | 0.000045 | 411.906677 | 971.411865 | 1.1286302 | 0.02178  | <u>DVL1</u>          |
| 0.000001 | 0.000001 | 4296.19727 | 9407.20605 | 1.1274966 | 0.014435 | <u>NCL</u>           |
| 0.000238 | 0.000007 | 691.751648 | 1621.56946 | 1.1259873 | 0.018527 | <u>BCL7B</u>         |
| 0.049101 | 0.000321 | 275.652557 | 646.33313  | 1.1248413 | 0.026869 | <u>WBP1L</u>         |
| 0.000015 | 0.000002 | 1297.55847 | 2949.61182 | 1.1236867 | 0.016466 | <u>MCTS1</u>         |
| 0.000279 | 0.000008 | 670.78949  | 1570.89539 | 1.1233226 | 0.018915 | FAM21C FAM21A FAM21B |
| 0.335017 | 0.004166 | 182.370895 | 416.865723 | 1.1229639 | 0.037635 | <u>GADD45G</u>       |
| 0.03891  | 0.000259 | 287.181763 | 673.104309 | 1.1225586 | 0.026497 | <u>FOXRED1</u>       |
| 0.82492  | 0.061833 | 120.532486 | 263.887482 | 1.1218334 | 0.049547 | <u>C9orf91</u>       |
| 0.000064 | 0.000004 | 906.613892 | 2084.32861 | 1.1214366 | 0.017771 | <u>HDGFRP2</u>       |
| 0.000006 | 0.000001 | 1785.97705 | 4048.18701 | 1.1207718 | 0.01598  | <u>GLS</u>           |
| 0.120556 | 0.000912 | 231.631989 | 536.380005 | 1.1201472 | 0.03034  | <u>NAA40</u>         |

|          |          |            |            |           |          |                  |
|----------|----------|------------|------------|-----------|----------|------------------|
|          |          |            |            |           |          | HIST1H2BL        |
|          |          |            |            |           |          | HIST1H2BK        |
|          |          |            |            |           |          | HIST2H2BF        |
|          |          |            |            |           |          | HIST2H2BA        |
|          |          |            |            |           |          | HIST1H2BM        |
|          |          |            |            |           |          | HIST1H2BD        |
|          |          |            |            |           |          | HIST1H2BF        |
|          |          |            |            |           |          | HIST1H2BB        |
|          |          |            |            |           |          | HIST1H2BE        |
|          |          |            |            |           |          | HIST1H2BI        |
| 0.000319 | 0.000009 | 654.019775 | 1528.82642 | 1.1200959 | 0.019336 | HIST2H2BC        |
| 0.000078 | 0.000004 | 884.603638 | 2034.61072 | 1.1196688 | 0.018135 | <u>PRPF40A</u>   |
| 0.000097 | 0.000005 | 830.10199  | 1915.09644 | 1.1179842 | 0.018423 | <u>SMIM13</u>    |
| 0.001374 | 0.000014 | 557.59375  | 1301.27124 | 1.1174181 | 0.022086 | <u>MRPS31P5</u>  |
| 0.302854 | 0.003643 | 186.563324 | 425.470764 | 1.1169345 | 0.035607 | <u>DUSP3</u>     |
| 0.000041 | 0.000003 | 1004.08801 | 2285.11255 | 1.1162878 | 0.017836 | <u>KANSL1</u>    |
| 0.000003 | 0.000001 | 2510.21997 | 5531.11963 | 1.1155763 | 0.015987 | <u>COL18A1</u>   |
| 0.111737 | 0.000768 | 238.96875  | 552.633911 | 1.1155008 | 0.031873 | <u>C14orf142</u> |
| 0.005863 | 0.000055 | 396.185028 | 925.518433 | 1.1148728 | 0.023596 | <u>PAPD7</u>     |
| 0.430626 | 0.007522 | 167.697372 | 377.665039 | 1.114363  | 0.038865 | <u>ATP5G3</u>    |
| 0.00024  | 0.000007 | 693.8479   | 1612.96436 | 1.1140923 | 0.019613 | <u>NUMA1</u>     |
| 0.002616 | 0.000002 | 1359.39685 | 3070.08228 | 1.1138868 | 0.03189  | <u>CNOT7</u>     |
| 0.000003 | 0.000001 | 2423.22705 | 5347.5459  | 1.1136803 | 0.016042 | <u>SC5DL</u>     |
| 0.17989  | 0.001542 | 213.814148 | 490.486511 | 1.1135246 | 0.033846 | <u>KLHDC7A</u>   |
| 0.117957 | 0.000924 | 232.680099 | 535.423889 | 1.110637  | 0.031551 | <u>TJP2</u>      |
|          |          |            |            |           |          | TGIF2-           |
|          |          |            |            |           |          | C20orf24 C       |
| 0.000028 | 0.000001 | 3437.79614 | 7466.29443 | 1.1101287 | 0.019329 | 20orf24          |
| 0.000015 | 0.000002 | 1319.56873 | 2971.60254 | 1.1100421 | 0.017587 | <u>PPAP2A</u>    |
| 0.006298 | 0.000059 | 390.944489 | 910.220581 | 1.1100061 | 0.024217 | <u>KIF2A</u>     |
| 0.000618 | 0.000013 | 579.604065 | 1344.29639 | 1.1085834 | 0.02114  | <u>GORASP1</u>   |
| 0.724274 | 0.035325 | 133.109787 | 291.614777 | 1.1084447 | 0.047899 | <u>C1orf52</u>   |
| 0.002069 | 0.000003 | 957.971252 | 2172.29102 | 1.1062458 | 0.02926  | <u>ZNF639</u>    |
| 0.002331 | 0.00003  | 461.167786 | 1067.02332 | 1.1046776 | 0.023259 | <u>ASMTL</u>     |
| 0.669727 | 0.026733 | 139.398438 | 305.956482 | 1.104537  | 0.046822 | <u>C3orf33</u>   |
| 0.03513  | 0.000251 | 292.422302 | 676.928772 | 1.1039468 | 0.02849  | <u>RASAL2</u>    |
|          |          |            |            |           |          | PLGLB2 PLG       |
| 0.000328 | 0.000009 | 650.875427 | 1503.01135 | 1.1025041 | 0.021012 | LB1              |
| 0.000001 | 0.       | 5098.      | 10856.6748 | 1.1021928 | 0.016179 | <u>USP38</u>     |
|          |          |            |            |           |          | <u>previous</u>  |
|          |          |            |            |           |          | <u>version</u>   |
|          |          |            |            |           |          | <u>conserved</u> |
| 0.004457 | 0.000047 | 414.002899 | 958.026306 | 1.1004192 | 0.024701 | <u>probe</u>     |
| 0.025008 | 0.000192 | 310.240143 | 716.129456 | 1.0991988 | 0.028478 | <u>GTF3C4</u>    |
| 0.003946 | 0.000044 | 422.387756 | 975.236328 | 1.0975909 | 0.02482  | <u>MED29</u>     |
|          |          |            |            |           |          | FAM133B FA       |
|          |          |            |            |           |          | M133CP FAM       |
| 0.000004 | 0.000001 | 2143.38208 | 4724.15967 | 1.0972717 | 0.017543 | 133DP            |
| 0.000002 | 0.000001 | 3143.27759 | 6772.15576 | 1.0970437 | 0.017032 | <u>PTX3</u>      |
|          |          |            |            |           |          | HIST2H4B H       |
| 0.088882 | 0.00069  | 246.305511 | 563.151184 | 1.0963806 | 0.032381 | IST2H4A          |
| 0.000032 | 0.000003 | 1065.92639 | 2385.50464 | 1.0962858 | 0.019391 | <u>PPP5C</u>     |
| 0.290577 | 0.003733 | 188.659546 | 423.558533 | 1.0932691 | 0.038892 | <u>OARD1</u>     |
| 0.086969 | 0.000615 | 251.546051 | 574.624573 | 1.0932628 | 0.033911 | <u>RCL1</u>      |

|          |          |            |            |           |          |                 |
|----------|----------|------------|------------|-----------|----------|-----------------|
| 0.       | 0.       | 16241.4902 | 33053.8203 | 1.0927733 | 0.016429 | <u>FHL2</u>     |
| 0.384377 | 0.006457 | 173.986023 | 387.226196 | 1.0926346 | 0.041334 | <u>SLC25A42</u> |
| 0.000374 | 0.00001  | 635.153809 | 1456.16174 | 1.092068  | 0.022207 | <u>RABGAP1</u>  |
| 0.000336 | 0.000009 | 647.731079 | 1484.84509 | 1.0919577 | 0.022096 | <u>GNL3</u>     |
| 0.000543 | 0.000012 | 593.229431 | 1359.59424 | 1.091462  | 0.022718 | <u>ATP11B</u>   |
| 0.037523 | 0.000244 | 296.614716 | 680.753235 | 1.0910406 | 0.031398 | <u>ACOX3</u>    |
| 0.001098 | 0.000026 | 524.05426  | 1200.87927 | 1.0910187 | 0.025632 | <u>TLR4</u>     |
| 0.623563 | 0.02231  | 144.638977 | 315.517639 | 1.0908312 | 0.047993 | <u>MARK3</u>    |
| 0.       | 0.       | 24225.9824 | 49486.5508 | 1.0904602 | 0.016535 | <u>RPL4</u>     |
| 0.000188 | 0.000007 | 724.243042 | 1653.12122 | 1.0895181 | 0.021701 | <u>RABEPK</u>   |
| 0.384375 | 0.006933 | 173.986023 | 386.270081 | 1.089197  | 0.043299 | <u>ATG16L1</u>  |
| 0.341712 | 0.005168 | 180.274673 | 401.567902 | 1.0887171 | 0.040932 | <u>BTRC</u>     |
| 0.000001 | 0.       | 5348.49805 | 11243.9014 | 1.0886063 | 0.01726  | <u>NDUFS8</u>   |
| 0.004007 | 0.000046 | 421.339661 | 966.631287 | 1.0879914 | 0.025947 | <u>PAPD4</u>    |
| 0.178513 | 0.001713 | 213.814148 | 481.88147  | 1.0879082 | 0.03742  | <u>CHAC2</u>    |
| 0.020261 | 0.000084 | 367.886108 | 843.292603 | 1.0873706 | 0.033359 | <u>TLL1</u>     |
| 0.000011 | 0.000002 | 1455.82275 | 3226.88501 | 1.0863762 | 0.019411 | <u>FKBP3</u>    |
| 0.000275 | 0.00001  | 672.885681 | 1535.51917 | 1.0861584 | 0.023199 | <u>ADAMTS15</u> |
|          |          |            |            |           |          | CT45A5 LOC      |
|          |          |            |            |           |          | 101060211       |
|          |          |            |            |           |          | LOC1010602      |
| 0.430625 | 0.008525 | 167.697372 | 370.016144 | 1.0859118 | 0.043661 | 08              |
| 0.110495 | 0.000953 | 235.824432 | 533.511658 | 1.0848605 | 0.035098 | <u>TXNL4B</u>   |
| 0.000049 | 0.000003 | 968.452332 | 2162.72998 | 1.0844159 | 0.020897 | <u>CD99</u>     |
| 0.070115 | 0.000551 | 257.834717 | 586.0979   | 1.0839833 | 0.033277 | <u>PCNX</u>     |
| 0.002178 | 0.000031 | 466.408325 | 1063.19885 | 1.0832573 | 0.025536 | <u>DHX38</u>    |
| 0.000068 | 0.000004 | 899.277161 | 2016.44458 | 1.0832204 | 0.021331 | <u>PTPRM</u>    |
| 0.006    | 0.000062 | 394.088837 | 900.659424 | 1.0823362 | 0.027336 | <u>RBM7</u>     |
| 0.000638 | 0.000014 | 576.459717 | 1312.74463 | 1.0822061 | 0.023914 | <u>ATF1</u>     |
| 0.000861 | 0.000017 | 547.112671 | 1245.81665 | 1.0819952 | 0.024344 | <u>AKAP13</u>   |
| 0.       | 0.       | 11499.8477 | 23375.0762 | 1.0816717 | 0.017436 | <u>PEBP1</u>    |
| 0.000007 | 0.000001 | 1698.98401 | 3753.70386 | 1.0816015 | 0.019387 | <u>MPV17</u>    |
| 0.004466 | 0.00005  | 414.002899 | 945.596802 | 1.0810097 | 0.026971 | <u>MCAT</u>     |
|          |          |            |            |           |          | previous        |
|          |          |            |            |           |          | version         |
|          |          |            |            |           |          | conserved       |
| 0.000097 | 0.000005 | 829.053894 | 1864.42236 | 1.0795932 | 0.022029 | <u>probe</u>    |
| 0.001265 | 0.000022 | 511.47699  | 1162.63464 | 1.0793484 | 0.025174 | <u>CYTH1</u>    |
| 0.000009 | 0.000001 | 1502.98767 | 3313.89136 | 1.0785036 | 0.01997  | <u>WBP5</u>     |
| 0.488673 | 0.011971 | 160.360611 | 349.937744 | 1.0768502 | 0.046821 | <u>ANKRD28</u>  |
| 0.000003 | 0.000001 | 2290.11719 | 4953.62695 | 1.0768211 | 0.019229 | <u>KIFC3</u>    |
| 0.000032 | 0.000003 | 1070.1189  | 2363.51392 | 1.0767435 | 0.021239 | <u>CLEC2B</u>   |
| 0.000345 | 0.00001  | 644.586792 | 1461.89844 | 1.0765285 | 0.023764 | <u>DMRTA1</u>   |
| 0.000018 | 0.000002 | 1245.15295 | 2737.35449 | 1.0760137 | 0.020778 | <u>CRHBP</u>    |
| 0.000024 | 0.000002 | 1155.01562 | 2541.35107 | 1.0750345 | 0.02113  | <u>NFATC3</u>   |
| 0.000024 | 0.000002 | 1210.56543 | 2658.95312 | 1.0748814 | 0.021239 | <u>ELAVL1</u>   |
| 0.000001 | 0.000001 | 4234.35889 | 8946.35938 | 1.0739424 | 0.018694 | <u>RPS6</u>     |
| 0.000001 | 0.       | 5914.47656 | 12213.4014 | 1.0739384 | 0.018443 | <u>CDKN1A</u>   |
|          |          |            |            |           |          | PRKRIP1 LO      |
| 0.000003 | 0.000001 | 2520.70117 | 5395.35156 | 1.0723545 | 0.019487 | C100630923      |
| 0.00011  | 0.000005 | 807.043579 | 1808.96777 | 1.072022  | 0.022956 | <u>KCTD5</u>    |
| 0.000013 | 0.000002 | 1352.06006 | 2964.90967 | 1.0716447 | 0.020943 | <u>KLC1</u>     |
| 0.001124 | 0.000021 | 521.958069 | 1179.84473 | 1.0713365 | 0.025939 | <u>SIL1</u>     |
| 0.000001 | 0.000001 | 3715.54492 | 7849.69629 | 1.0708596 | 0.019122 | <u>CCT2</u>     |

|          |          |            |            |           |          |                  |
|----------|----------|------------|------------|-----------|----------|------------------|
| 0.505955 | 0.013459 | 158.264389 | 343.244934 | 1.0701409 | 0.04876  | <u>ACN9</u>      |
| 0.296612 | 0.004291 | 187.611435 | 413.997375 | 1.0698881 | 0.043017 | <u>BLMH</u>      |
| 0.000001 | 0.000001 | 4614.82227 | 9673.96191 | 1.0697848 | 0.018998 | <u>SERPINH1</u>  |
| 0.000002 | 0.000001 | 3303.63818 | 6975.80811 | 1.0683196 | 0.019482 | <u>NTN4</u>      |
| 0.020205 | 0.000173 | 321.769348 | 727.602783 | 1.0682771 | 0.031802 | <u>C6orf99</u>   |
|          |          |            |            |           |          | METTL2A ME       |
| 0.430618 | 0.009227 | 167.697372 | 365.235565 | 1.0678294 | 0.046973 | TTL2B            |
|          |          |            |            |           |          | <u>previous</u>  |
|          |          |            |            |           |          | <u>version</u>   |
|          |          |            |            |           |          | <u>conserved</u> |
| 0.115405 | 0.001068 | 233.72821  | 522.038269 | 1.0670977 | 0.037856 | <u>probe</u>     |
| 0.240856 | 0.003049 | 198.092514 | 437.900238 | 1.0665916 | 0.042064 | <u>H2AFJ</u>     |
| 0.212484 | 0.002414 | 205.429276 | 455.110291 | 1.0665744 | 0.042278 | <u>AHCYL2</u>    |
| 0.000001 | 0.000002 | 1490.4104  | 3256.52441 | 1.0655693 | 0.021258 | <u>POLR2C</u>    |
| 0.000048 | 0.000003 | 971.59668  | 2141.69556 | 1.0652447 | 0.022827 | <u>HMGN3</u>     |
| 0.016725 | 0.000149 | 332.250427 | 749.593445 | 1.0646154 | 0.031847 | <u>FOXO4</u>     |
| 0.000001 | 0.       | 5653.49756 | 11642.6006 | 1.0643885 | 0.019331 | <u>GBA</u>       |
| 0.006096 | 0.000067 | 393.04071  | 887.273865 | 1.0640623 | 0.0297   | <u>VASP</u>      |
| 0.001206 | 0.000022 | 515.669434 | 1158.81018 | 1.0628642 | 0.027069 | <u>GUSB</u>      |
| 0.066681 | 0.000343 | 284.037415 | 638.684204 | 1.0628181 | 0.042181 | <u>SYNCRIP</u>   |
|          |          |            |            |           |          | <u>previous</u>  |
|          |          |            |            |           |          | <u>version</u>   |
|          |          |            |            |           |          | <u>conserved</u> |
| 0.086975 | 0.000848 | 247.353622 | 552.633911 | 1.0625797 | 0.038767 | <u>probe</u>     |
| 0.001249 | 0.000022 | 513.573181 | 1153.07361 | 1.0615759 | 0.027304 | <u>CSRP2</u>     |
| 0.000165 | 0.000006 | 755.686279 | 1688.49744 | 1.0608092 | 0.024729 | <u>WDR12</u>     |
| 0.000001 | 0.000001 | 3511.16382 | 7370.68311 | 1.0606557 | 0.020138 | <u>PCNA</u>      |
| 0.256727 | 0.003486 | 194.948196 | 428.339111 | 1.0591947 | 0.043869 | <u>LIN52</u>     |
| 0.000803 | 0.000017 | 553.401306 | 1239.12378 | 1.0578029 | 0.027085 | <u>SLC27A1</u>   |
| 0.000002 | 0.000001 | 3219.78955 | 6751.12109 | 1.0576368 | 0.02054  | <u>KRT10</u>     |
|          |          |            |            |           |          | AQP12B AQP       |
| 0.000644 | 0.000015 | 575.411621 | 1287.88562 | 1.0572932 | 0.026828 | 12A              |
| 0.001037 | 0.00002  | 529.294861 | 1183.66919 | 1.0559233 | 0.027705 | <u>ADSSL1</u>    |
| 0.01182  | 0.000116 | 352.16449  | 788.794067 | 1.0533622 | 0.032615 | <u>LIF</u>       |
| 0.048883 | 0.000423 | 275.652557 | 614.781311 | 1.0524073 | 0.036812 | <u>S100A16</u>   |
| 0.000001 | 0.       | 5240.54297 | 10766.8008 | 1.0516994 | 0.020606 | <u>MARS</u>      |
| 0.290578 | 0.004478 | 188.659546 | 411.129028 | 1.0516716 | 0.046197 | <u>NHLH1</u>     |
| 0.036636 | 0.000316 | 290.32608  | 648.2453   | 1.0515875 | 0.035961 | <u>PRMT10</u>    |
| 0.000004 | 0.000001 | 2109.84253 | 4515.72656 | 1.0511845 | 0.021889 | <u>NOLC1</u>     |
| 0.407078 | 0.008797 | 170.841705 | 368.103912 | 1.0502006 | 0.049782 | <u>ZBTB49</u>    |
| 0.000048 | 0.000004 | 968.452332 | 2113.01196 | 1.0495881 | 0.024563 | <u>SSR2</u>      |
| 0.       | 0.       | 20235.832  | 40222.7617 | 1.0482439 | 0.020315 | <u>UBE2J2</u>    |
| 0.004191 | 0.000053 | 418.195312 | 934.123413 | 1.0479199 | 0.03116  | <u>ATP5SL</u>    |
| 0.000001 | 0.000001 | 3890.5791  | 8087.76855 | 1.0478996 | 0.021277 | <u>TLE4</u>      |
| 0.000004 | 0.000001 | 2301.64648 | 4876.18164 | 1.046114  | 0.022493 | <u>TOB2</u>      |
| 0.000004 | 0.000001 | 2169.58472 | 4617.07471 | 1.0458678 | 0.022406 | <u>ADI1</u>      |
| 0.001235 | 0.000022 | 521.958069 | 1158.81018 | 1.0454326 | 0.029521 | <u>FAM179B</u>   |
| 0.007674 | 0.000084 | 378.367188 | 843.292603 | 1.0453769 | 0.032784 | <u>TCEAL8</u>    |
| 0.000009 | 0.000001 | 1556.44128 | 3354.0481  | 1.0452902 | 0.023383 | <u>RILPL2</u>    |
| 0.000298 | 0.000007 | 727.387329 | 1609.13989 | 1.0446276 | 0.027931 | <u>TOM1L1</u>    |
| 0.000002 | 0.000001 | 2637.04126 | 5514.86572 | 1.0426506 | 0.022378 | <u>SOBP</u>      |
| 0.000001 | 0.000001 | 3505.9231  | 7266.4668  | 1.0419697 | 0.022021 | <u>ITGA3</u>     |
| 0.000009 | 0.000002 | 1532.33472 | 3293.81299 | 1.0418242 | 0.023719 | <u>XPA</u>       |
| 0.000118 | 0.000006 | 795.514404 | 1748.73254 | 1.0414395 | 0.026551 | <u>KDM5A</u>     |

|          |          |            |            |           |          |                  |
|----------|----------|------------|------------|-----------|----------|------------------|
| 0.000021 | 0.000002 | 1186.45886 | 2548.04395 | 1.0401506 | 0.02479  | <u>ADAMTS5</u>   |
| 0.000069 | 0.000004 | 891.94043  | 1939.95544 | 1.0367715 | 0.02649  | <u>STX5</u>      |
| 0.000005 | 0.000001 | 1891.83594 | 4033.84521 | 1.0357583 | 0.023804 | <u>FBXO30</u>    |
| 0.033066 | 0.000304 | 295.56662  | 653.025879 | 1.0354789 | 0.038213 | <u>MCPH1</u>     |
| 0.000088 | 0.000005 | 845.823608 | 1844.34399 | 1.0353606 | 0.026952 | <u>SMAD5</u>     |
| 0.000342 | 0.000011 | 645.634888 | 1421.74158 | 1.0340843 | 0.028885 | <u>UBALD1</u>    |
| 0.000001 | 0.       | 8030.60791 | 15833.249  | 1.0332723 | 0.022202 | <u>ATP6V0B</u>   |
| 0.000506 | 0.000005 | 835.342529 | 1820.44116 | 1.0332713 | 0.032111 | <u>PDHB</u>      |
| 0.000001 | 0.       | 6544.39014 | 13044.2637 | 1.0330835 | 0.022376 | <u>ARL6IP1</u>   |
| 0.226025 | 0.003172 | 201.236847 | 435.031891 | 1.0329134 | 0.047859 | <u>MVB12B</u>    |
| 0.003405 | 0.000048 | 432.868835 | 956.114075 | 1.0329093 | 0.032908 | <u>RNF25</u>     |
| 0.008783 | 0.000097 | 369.98233  | 817.477539 | 1.0326671 | 0.035001 | <u>HRAS</u>      |
| 0.000011 | 0.000002 | 1424.37952 | 3040.44263 | 1.0324598 | 0.025015 | <u>CLCN6</u>     |
| 0.000001 | 0.       | 5155.646   | 10466.5801 | 1.032277  | 0.023278 | <u>SUV420H1</u>  |
| 0.000044 | 0.000004 | 986.270142 | 2124.48535 | 1.0321904 | 0.026552 | <u>ASPH</u>      |
|          |          |            |            |           |          | <u>previous</u>  |
|          |          |            |            |           |          | <u>version</u>   |
|          |          |            |            |           |          | <u>conserved</u> |
| 0.001885 | 0.000032 | 477.9375   | 1051.72546 | 1.0321307 | 0.031916 | <u>probe</u>     |
| 0.000004 | 0.000001 | 2141.28589 | 4519.55127 | 1.031929  | 0.023954 | <u>DCTN3</u>     |
| 0.261942 | 0.004114 | 193.900085 | 416.865723 | 1.0288945 | 0.049801 | <u>TMEM25</u>    |
| 0.000001 | 0.000001 | 4647.31348 | 9469.35352 | 1.0288094 | 0.023114 | <u>PTOV1</u>     |
| 0.000004 | 0.000001 | 2117.17944 | 4462.18408 | 1.0283986 | 0.024387 | <u>BAG1</u>      |
| 0.00001  | 0.000002 | 1463.15955 | 3107.37061 | 1.0249058 | 0.025828 | <u>EIF6</u>      |
| 0.000001 | 0.000001 | 3719.7373  | 7612.58008 | 1.024314  | 0.023878 | <u>MPDU1</u>     |
| 0.000005 | 0.000001 | 1870.87378 | 3957.35596 | 1.0237268 | 0.025234 | <u>RNF19A</u>    |
| 0.015174 | 0.000109 | 363.693665 | 798.355225 | 1.0231141 | 0.040477 | <u>CAB39L</u>    |
| 0.035854 | 0.000346 | 291.374176 | 637.728088 | 1.022527  | 0.040694 | <u>ALS2CR12</u>  |
|          |          |            |            |           |          | <u>previous</u>  |
|          |          |            |            |           |          | <u>version</u>   |
|          |          |            |            |           |          | <u>conserved</u> |
| 0.090831 | 0.000951 | 245.257401 | 532.555542 | 1.0220777 | 0.04457  | <u>probe</u>     |
| 0.011016 | 0.000123 | 356.356903 | 781.145203 | 1.0211881 | 0.037502 | <u>KIAA1143</u>  |
| 0.000001 | 0.000001 | 3492.29785 | 7129.74268 | 1.0197998 | 0.024486 | <u>WAC</u>       |
| 0.024048 | 0.00024  | 312.336365 | 682.665405 | 1.0180044 | 0.040159 | <u>CLCN5</u>     |
|          |          |            |            |           |          | <u>previous</u>  |
|          |          |            |            |           |          | <u>version</u>   |
|          |          |            |            |           |          | <u>conserved</u> |
| 0.078063 | 0.000807 | 252.594162 | 547.853333 | 1.0178329 | 0.044651 | <u>probe</u>     |
| 0.000009 | 0.000001 | 1596.26941 | 3375.08252 | 1.0177477 | 0.026585 | <u>HNMT</u>      |
| 0.000009 | 0.000002 | 1530.23853 | 3234.53394 | 1.0177195 | 0.026565 | <u>SLC19A2</u>   |
| 0.000025 | 0.000003 | 1138.24597 | 2410.36353 | 1.016928  | 0.027831 | <u>ZNF721</u>    |
| 0.000027 | 0.000003 | 1112.04321 | 2355.86499 | 1.016343  | 0.028004 | <u>SPCS1</u>     |
| 0.000017 | 0.000002 | 1258.77844 | 2654.17261 | 1.015737  | 0.027555 | <u>FOXJ3</u>     |
| 0.000003 | 0.000001 | 2459.91089 | 5079.83398 | 1.0154579 | 0.025604 | <u>HYI</u>       |
| 0.000003 | 0.000001 | 2513.36426 | 5181.18213 | 1.0153823 | 0.025571 | <u>TMEM132A</u>  |
| 0.000007 | 0.000001 | 1676.97375 | 3538.57812 | 1.0149341 | 0.026614 | <u>OTUD3</u>     |
| 0.000692 | 0.000017 | 568.074829 | 1234.34326 | 1.0146021 | 0.032722 | <u>CTIF</u>      |
| 0.000002 | 0.000001 | 4600.14844 | 9282.91113 | 1.0137588 | 0.025808 | <u>RSL1D1</u>    |
| 0.000084 | 0.000003 | 1148.72705 | 2426.61743 | 1.0137439 | 0.030972 | <u>CCDC53</u>    |
| 0.019655 | 0.00019  | 328.057983 | 715.17334  | 1.0137336 | 0.040915 | <u>ING4</u>      |
|          |          |            |            |           |          | C2orf27B C       |
| 0.000005 | 0.000001 | 1929.56787 | 4048.18701 | 1.0134476 | 0.026404 | 2orf27A          |
| 0.001049 | 0.000023 | 528.246704 | 1146.38074 | 1.0126808 | 0.033737 | <u>NOP16</u>     |

|          |          |            |            |           |           |                |
|----------|----------|------------|------------|-----------|-----------|----------------|
| 0.000001 | 0.000001 | 4468.08691 | 9024.76074 | 1.0126296 | 0.025278  | <u>PRDX2</u>   |
| 0.000457 | 0.000013 | 612.095398 | 1328.04248 | 1.0126282 | 0.032328  | <u>DCAF10</u>  |
| 0.117952 | 0.001375 | 232.680099 | 500.047638 | 1.011707  | 0.047936  | <u>CCL20</u>   |
| 0.000003 | 0.000001 | 2225.13452 | 4617.07471 | 1.0107804 | 0.026393  | <u>PDPK1</u>   |
| 0.018725 | 0.000198 | 325.961761 | 708.48053  | 1.0093415 | 0.040908  | <u>RGS7</u>    |
| 0.001539 | 0.00003  | 494.707245 | 1070.84778 | 1.0088687 | 0.035046  | <u>MRPL44</u>  |
| 0.000002 | 0.000001 | 2565.76978 | 5257.67139 | 1.0088184 | 0.026339  | <u>FRMD6</u>   |
| 0.000019 | 0.000002 | 1216.854   | 2556.64893 | 1.0086367 | 0.028621  | <u>SUGT1</u>   |
| 0.038127 | 0.000388 | 288.229858 | 624.342468 | 1.0080453 | 0.043534  | <u>REM2</u>    |
| 0.000001 | 0.       | 8067.2915  | 15633.4209 | 1.0077475 | 0.025091  | <u>PPA1</u>    |
| 0.000001 | 0.000001 | 3422.07446 | 6908.88037 | 1.0031611 | 0.026538  | <u>DPM1</u>    |
| 0.000008 | 0.000001 | 1599.4137  | 3345.44312 | 1.0022347 | 0.028419  | <u>CAPRIN1</u> |
|          |          |            |            |           |           | TXNDC5 BLO     |
|          |          |            |            |           |           | C1S5-          |
| 0.000003 | 0.000001 | 2500.78711 | 5112.3418  | 1.0021951 | 0.027291  | TXNDC5         |
| 0.005691 | 0.00006  | 420.291534 | 909.264465 | 1.0006403 | 0.04055   | <u>CDC6</u>    |
| 0.000003 | 0.000001 | 2547.9519  | 5193.61133 | 1.0000229 | 0.027717  | <u>SMCR8</u>   |
| 0.010085 | 0.983731 | 361.597473 | 86.050263  | -2.08492  | 0.0017773 | AMT            |
| 0.000001 | 0.000005 | 4462.84619 | 1784.10876 | -1.37924  | 0.0047276 | FUCA1          |
| 0.000021 | 0.005479 | 1187.50696 | 397.743439 | -1.681243 | 0.001974  | TRIM21         |
| 0.001836 | 0.233571 | 480.033722 | 201.740067 | -1.328611 | 0.015427  | GDF5           |
| 0.000001 | 0.000001 | 9336.55078 | 3902.85767 | -1.262823 | 0.0075839 | ST6GAL1        |
| 0.000002 | 0.000012 | 2805.78662 | 1380.62866 | -1.084008 | 0.0199636 | HLTF           |
| 0.000042 | 0.000961 | 1000.94366 | 531.599426 | -1.019899 | 0.0339907 | SLC39A11       |
| 0.       | 0.000001 | 15612.625  | 6998.75488 | -1.106995 | 0.0156208 | NCSTN          |
| 0.000002 | 0.000008 | 3128.604   | 1562.29041 | -1.063823 | 0.0216306 | UBE2T          |
| 0.000309 | 0.010671 | 658.212158 | 356.630554 | -1.001406 | 0.0432144 | ALDH5A1        |
| 0.       | 0.000002 | 12235.6191 | 3121.7124  | -1.962398 | 0.0003467 | BLCAP          |
| 0.000013 | 0.000193 | 1359.39685 | 712.304993 | -1.034258 | 0.0290927 | IDH2           |
| 0.000001 | 0.000004 | 4188.2417  | 2049.90845 | -1.083699 | 0.0190163 | NCAPD2         |
| 0.000001 | 0.000004 | 5260.45703 | 2067.11865 | -1.385492 | 0.0044939 | NAV1           |
| 0.000001 | 0.000005 | 5901.89941 | 1818.52893 | -1.736023 | 0.0009367 | SEMA4C         |
| 0.000003 | 0.000023 | 2379.20654 | 1150.2052  | -1.114174 | 0.017943  | PHF13          |
| 0.000131 | 0.005244 | 778.74469  | 400.611786 | -1.075158 | 0.029781  | C19orf25       |
| 0.00002  | 0.00076  | 1214.75781 | 553.590027 | -1.238927 | 0.0123784 | HDHD3          |
| 0.000054 | 0.040348 | 941.201477 | 284.921997 | -1.814106 | 0.0013971 | KALRN          |
| 0.000001 | 0.000003 | 4883.1377  | 2251.64868 | -1.154808 | 0.0133514 | ANGPTL2        |
| 0.00002  | 0.000378 | 1208.46924 | 627.210815 | -1.050719 | 0.028021  | FAM160A2       |
| 0.000007 | 0.000174 | 1665.44458 | 727.602783 | -1.29603  | 0.0085887 | EXTL3          |
| 0.001753 | 0.121704 | 484.226166 | 233.291824 | -1.144827 | 0.0301127 | PLEKHA4        |
| 0.000002 | 0.000016 | 2572.05835 | 1263.98279 | -1.086515 | 0.0200199 | SLC25A13       |
| 0.000001 | 0.000004 | 3825.59619 | 1942.82373 | -1.03305  | 0.0242614 | ZDHHC7         |
| 0.000004 | 0.000136 | 2180.06592 | 792.61853  | -1.542525 | 0.0027409 | FST            |
| 0.000022 | 0.014898 | 1168.64111 | 337.50827  | -1.886441 | 0.0009182 | TP53INP2       |
| 0.000005 | 0.000237 | 1902.31702 | 684.577637 | -1.571184 | 0.0024786 | LAMA5          |
| 0.001866 | 0.255224 | 494.707245 | 196.003387 | -1.41088  | 0.012154  | MMACHC         |
| 0.000003 | 0.000028 | 2266.01074 | 1090.92615 | -1.122715 | 0.0173616 | BOLA1          |
| 0.00038  | 0.020388 | 633.057556 | 320.298218 | -1.094777 | 0.0303635 | SMOC1          |
| 0.00275  | 0.165163 | 448.590485 | 217.037888 | -1.132451 | 0.0323625 | TYSND1         |
| 0.001825 | 0.048023 | 625.720825 | 276.316956 | -1.283397 | 0.0306504 | C2CD2          |
| 0.000072 | 0.006869 | 882.507446 | 383.401733 | -1.311219 | 0.0105195 | CUTC           |
| 0.000004 | 0.00005  | 2139.1897  | 945.596802 | -1.253963 | 0.0096694 | CCDC14         |
| 0.000002 | 0.000044 | 3014.36035 | 974.280212 | -1.693816 | 0.0012808 | NOD1           |

|          |          |            |            |           |           |           |
|----------|----------|------------|------------|-----------|-----------|-----------|
| 0.008834 | 0.990062 | 372.078552 | 81.269692  | -2.210096 | 0.0013019 | LRIG3     |
| 0.00125  | 0.405574 | 512.525085 | 172.100525 | -1.637445 | 0.0045594 | IFIT1     |
| 0.001049 | 0.10183  | 528.246704 | 239.984634 | -1.23175  | 0.0198584 | ZNF691    |
| 0.000046 | 0.001165 | 975.789062 | 514.389343 | -1.03192  | 0.03259   | STAT1     |
| 0.000303 | 0.078456 | 660.308411 | 252.414108 | -1.484442 | 0.0063594 | WDR89     |
| 0.000025 | 0.004477 | 1131.95728 | 411.129028 | -1.56597  | 0.0032145 | SLC7A8    |
| 0.000291 | 0.034666 | 665.54895  | 292.570892 | -1.292418 | 0.0134103 | RGS7BP    |
| 0.000001 | 0.00001  | 3383.29443 | 1457.1178  | -1.277594 | 0.0078955 | CHFR      |
| 0.00004  | 0.000959 | 1011.4248  | 538.292236 | -1.016366 | 0.0346483 | CCNB1     |
| 0.000036 | 0.00156  | 1036.57935 | 489.530396 | -1.188164 | 0.016369  | MIR17HG   |
| 0.000014 | 0.000284 | 1343.67517 | 661.63092  | -1.126689 | 0.0194545 | EML2      |
| 0.000008 | 0.006663 | 1610.94287 | 386.270081 | -2.162741 | 0.0002991 | ARRDC3    |
| 0.000001 | 0.000003 | 5313.91064 | 2374.03125 | -1.192126 | 0.0111013 | RGS5      |
| 0.000004 | 0.000799 | 2160.15186 | 548.809448 | -2.068403 | 0.0003405 | MTFP1     |
| 0.000001 | 0.000004 | 8656.3291  | 2032.69849 | -2.108815 | 0.0002079 | SLC29A1   |
| 0.000031 | 0.008938 | 1080.59998 | 367.147797 | -1.656183 | 0.002307  | SEMA4F    |
| 0.011608 | 0.63731  | 353.212585 | 144.373215 | -1.330477 | 0.0194061 | C5orf30   |
| 0.000003 | 0.000026 | 2239.80811 | 1108.13623 | -1.084034 | 0.0207619 | FAM174B   |
| 0.000132 | 0.021902 | 776.648438 | 316.473755 | -1.399203 | 0.0079219 | TMEM155   |
| 0.000002 | 0.000012 | 2616.0791  | 1363.4187  | -1.001021 | 0.0295406 | ITPRIP    |
| 0.000008 | 0.000242 | 1598.3656  | 681.709351 | -1.333581 | 0.0073724 | ZNF449    |
| 0.000022 | 0.001244 | 1181.21838 | 508.652679 | -1.320984 | 0.0088295 | ENGASE    |
| 0.00001  | 0.000178 | 1467.35205 | 784.01355  | -1.002149 | 0.033947  | PDIK1L    |
| 0.000182 | 0.073903 | 728.435486 | 255.282455 | -1.606625 | 0.0036955 | RTN4R     |
| 0.000019 | 0.003632 | 1225.23889 | 425.470764 | -1.632312 | 0.0023539 | TMEM51    |
| 0.000144 | 0.004605 | 764.071167 | 409.216827 | -1.018992 | 0.0377437 | SESTD1    |
| 0.000645 | 0.05497  | 685.463013 | 269.624176 | -1.447241 | 0.0121085 | XYLT2     |
| 0.000001 | 0.000002 | 6589.4585  | 2662.77759 | -1.31691  | 0.006038  | ZNF395    |
| 0.000008 | 0.006654 | 1589.98071 | 385.313965 | -2.147256 | 0.0003046 | FIBIN     |
| 0.000001 | 0.000007 | 3785.76807 | 1643.56006 | -1.267096 | 0.0081411 | AP1S2     |
| 0.000006 | 0.000061 | 1709.46509 | 905.440002 | -1.007237 | 0.0310054 | PRRG1     |
| 0.008347 | 0.967731 | 373.126648 | 93.699181  | -2.008982 | 0.0020929 | FZD3      |
| 0.000004 | 0.000027 | 2150.71875 | 1121.52173 | -1.010413 | 0.0294136 | MSC       |
| 0.000001 | 0.000001 | 7462.5332  | 3603.59375 | -1.058999 | 0.0203147 | LDOC1     |
| 0.004067 | 0.209815 | 420.291534 | 205.564514 | -1.112107 | 0.0364729 | TMPRSS5   |
| 0.       | 0.005985 | 30523.0176 | 13487.9014 | -1.119825 | 0.0455705 | C1orf122  |
| 0.000257 | 0.052705 | 681.270569 | 272.492493 | -1.423943 | 0.0079018 | SEL1L3    |
| 0.000376 | 0.013234 | 637.25     | 344.20105  | -1.004189 | 0.0437112 | LINC00174 |
| 0.000033 | 0.000768 | 1060.68591 | 552.633911 | -1.04539  | 0.0299042 | VPS13A    |
| 0.000017 | 0.000824 | 1259.82654 | 545.941101 | -1.311719 | 0.0088723 | RIPK4     |
| 0.000052 | 0.068257 | 959.019348 | 259.106903 | -1.971307 | 0.000806  | ABCC10    |
| 0.000769 | 0.03402  | 557.59375  | 293.527008 | -1.033605 | 0.0412807 | DHX58     |
| 0.       | 0.000001 | 27673.2109 | 9992.34766 | -1.42327  | 0.0033913 | LBH       |
| 0.000003 | 0.00018  | 2384.44702 | 721.866089 | -1.805867 | 0.0008728 | SLC11A2   |
| 0.000059 | 0.001979 | 950.63446  | 470.408112 | -1.124738 | 0.0231534 | RTKN      |
| 0.000009 | 0.000045 | 1919.08679 | 970.45575  | -1.064703 | 0.0275045 | GPC4      |
| 0.000012 | 0.000469 | 1409.70605 | 603.307983 | -1.329586 | 0.0078541 | SPTLC2    |
| 0.003167 | 0.894692 | 438.109375 | 91.786949  | -2.275976 | 0.0017892 | ZC3H10    |
|          |          |            |            |           |           | previous  |
| 0.001657 | 0.07539  | 488.41861  | 254.32634  | -1.04061  | 0.0432312 | version   |
|          |          |            |            |           |           | conserved |
|          |          |            |            |           |           | probe     |

|          |          |            |            |           |           |                                           |
|----------|----------|------------|------------|-----------|-----------|-------------------------------------------|
| 0.000114 | 0.382172 | 817.524719 | 181.661667 | -2.227642 | 0.0006692 | previous<br>version<br>conserved<br>probe |
| 0.000016 | 0.000571 | 1290.22168 | 582.273438 | -1.252931 | 0.0113444 | RBBP9                                     |
| 0.000947 | 0.057166 | 537.679688 | 267.711945 | -1.109313 | 0.0314357 | EFCAB4A                                   |
| 0.000002 | 0.000008 | 3476.57617 | 1605.31555 | -1.177531 | 0.0132083 | TBC1D14                                   |
| 0.000048 | 0.002476 | 970.548523 | 453.198059 | -1.207686 | 0.0154933 | KIF20A                                    |
| 0.000001 | 0.000001 | 9902.53027 | 4563.53223 | -1.116393 | 0.0152162 | ST3GAL4                                   |
| 0.000116 | 0.004877 | 798.658752 | 405.392365 | -1.093991 | 0.0272104 | SLC16A2                                   |
| 0.000002 | 0.000011 | 2805.78662 | 1425.56604 | -1.037886 | 0.0247969 | NAGA                                      |
| 0.000008 | 0.00009  | 1598.3656  | 830.863098 | -1.039501 | 0.0272724 | QDPR                                      |
| 0.000001 | 0.000002 | 5823.29102 | 2925.70898 | -1.011191 | 0.0266856 | IL4R                                      |
| 0.002039 | 0.143471 | 471.648865 | 223.730682 | -1.163508 | 0.0278407 | GPM6A                                     |
| 0.008356 | 0.338935 | 373.126648 | 181.661667 | -1.101553 | 0.0412774 | SNN                                       |
| 0.000001 | 0.000002 | 7342.00049 | 3202.98218 | -1.205118 | 0.0101611 | PDIA5                                     |
| 0.000001 | 0.000001 | 8643.75098 | 4039.58179 | -1.103797 | 0.0162703 | BTD                                       |
| 0.000003 | 0.000019 | 2484.01733 | 1213.30872 | -1.097095 | 0.019209  | RASSF2                                    |
| 0.000002 | 0.000012 | 2698.87964 | 1373.93591 | -1.03471  | 0.0252005 | GPD1L                                     |
| 0.040545 | 0.799975 | 285.085541 | 125.250938 | -1.202615 | 0.0365313 | KDELDC2                                   |
| 0.000251 | 0.245499 | 684.414917 | 197.915604 | -1.863239 | 0.0015525 | MOGS                                      |
| 0.002237 | 0.214013 | 464.312103 | 204.608414 | -1.261652 | 0.0195272 | NA                                        |
| 0.014967 | 0.520148 | 338.539062 | 157.75882  | -1.146944 | 0.0379508 | CLGN                                      |
| 0.000001 | 0.000006 | 4397.86377 | 1831.91455 | -1.319416 | 0.0062855 | PML                                       |
| 0.000017 | 0.00313  | 1271.35571 | 435.988007 | -1.650376 | 0.0021473 | NA                                        |
| 0.000069 | 0.004413 | 891.94043  | 412.085144 | -1.225774 | 0.014944  | GRAMD4                                    |
| 0.000008 | 0.000337 | 1581.59583 | 640.596436 | -1.409088 | 0.0053381 | PKLR                                      |
| 0.000387 | 0.030418 | 642.49054  | 299.263702 | -1.210501 | 0.0198023 | DUS4L                                     |
| 0.007816 | 0.358075 | 377.319092 | 178.793335 | -1.139754 | 0.0357811 | ECHDC3                                    |
| 0.000025 | 0.000715 | 1131.95728 | 580.361206 | -1.068536 | 0.0270696 | TRIM66                                    |
| 0.000003 | 0.000037 | 2289.06909 | 1013.4809  | -1.244903 | 0.0099158 | TNFAIP2                                   |
| 0.000071 | 0.001315 | 957.971252 | 503.872101 | -1.036034 | 0.0353802 | GEMIN2                                    |
| 0.000199 | 0.209828 | 715.858154 | 205.564514 | -1.874861 | 0.0014281 | JRKL                                      |
| 0.0001   | 0.00474  | 823.813354 | 407.304596 | -1.130834 | 0.0230465 | previous<br>version<br>conserved<br>probe |
| 0.000319 | 0.053906 | 654.019775 | 270.580292 | -1.376181 | 0.0097477 | TRMT1L                                    |
| 0.000003 | 0.000016 | 4434.54736 | 1267.80725 | -1.86584  | 0.0009476 | DDIT4L                                    |
| 0.000005 | 0.000086 | 1985.11768 | 840.424255 | -1.325469 | 0.0073156 | B4GALT5                                   |
| 0.000009 | 0.000153 | 1556.44128 | 745.768982 | -1.161675 | 0.0160918 | GLG1                                      |
| 0.002255 | 0.182571 | 476.889404 | 212.257324 | -1.250512 | 0.0219605 | ACBD4                                     |
| 0.000002 | 0.000014 | 2751.28491 | 1322.30579 | -1.117734 | 0.017141  | MEGF8                                     |
| 0.00001  | 0.002295 | 1487.26611 | 458.934753 | -1.802861 | 0.0010845 | PANK1                                     |
| 0.000003 | 0.000033 | 2425.32324 | 1044.07654 | -1.280944 | 0.0083051 | previous<br>version<br>conserved<br>probe |
| 0.000006 | 0.000025 | 2668.48438 | 1119.6095  | -1.313061 | 0.0097511 | SLC17A5                                   |
| 0.000001 | 0.000001 | 7445.76318 | 3670.52197 | -1.029372 | 0.0233794 | MXI1                                      |
| 0.000001 | 0.000003 | 4938.6875  | 2292.76147 | -1.14331  | 0.0140803 | FLJ37453                                  |
| 0.000001 | 0.000006 | 4017.40015 | 1743.95203 | -1.265659 | 0.0081341 | HPS6                                      |
| 0.000013 | 0.000481 | 1376.1665  | 600.439636 | -1.301678 | 0.0089568 | ACCS                                      |
| 0.001025 | 0.345237 | 530.342957 | 180.705551 | -1.620684 | 0.0046732 | BIRC3                                     |



|          |          |            |            |           |           |                                           |
|----------|----------|------------|------------|-----------|-----------|-------------------------------------------|
| 0.00013  | 0.182575 | 789.225769 | 212.257324 | -1.968092 | 0.0009936 | SPRYD4                                    |
| 0.00742  | 0.990634 | 380.463409 | 79.357468  | -2.277761 | 0.0010229 | DUSP18                                    |
| 0.000678 | 0.029853 | 570.171082 | 300.219818 | -1.034334 | 0.0406897 | SCN2B                                     |
| 0.000011 | 0.000157 | 1414.94653 | 744.812866 | -1.025819 | 0.0299284 | C1QL1                                     |
| 0.00098  | 0.064322 | 534.5354   | 261.97525  | -1.130335 | 0.0290921 | VANGL2                                    |
| 0.002182 | 0.671232 | 471.648865 | 140.548767 | -1.792164 | 0.0031675 | FRAT2                                     |
| 0.000016 | 0.011208 | 1318.52063 | 353.762207 | -1.995455 | 0.0006026 | LRFN3                                     |
| 0.067161 | 0.879594 | 259.930939 | 113.777573 | -1.194153 | 0.0410766 | SH3RF2                                    |
| 0.000582 | 0.186253 | 585.8927   | 211.301208 | -1.552647 | 0.0054396 | GTF2E1                                    |
| 0.00141  | 0.085455 | 502.044006 | 248.589661 | -1.110998 | 0.0326591 | RSPH6A                                    |
| 0.000003 | 0.000141 | 2385.49512 | 757.24231  | -1.735367 | 0.0011579 | ITGA5                                     |
| 0.000013 | 0.00069  | 1384.55139 | 563.151184 | -1.40325  | 0.0059489 | FOXS1                                     |
| 0.00016  | 0.017407 | 749.397644 | 328.903229 | -1.295663 | 0.0123734 | TARBP1                                    |
| 0.000139 | 0.058298 | 769.311707 | 266.755829 | -1.623571 | 0.0033197 | TRAM1L1                                   |
| 0.000003 | 0.000017 | 2407.50537 | 1237.21155 | -1.025582 | 0.0267562 | TRAK2                                     |
| 0.000001 | 0.000002 | 6234.1499  | 2764.12573 | -1.1868   | 0.011217  | FAM57A                                    |
| 0.000001 | 0.000003 | 5170.31982 | 2209.57959 | -1.261854 | 0.0080143 | ZNF217                                    |
| 0.000001 | 0.000046 | 5825.3877  | 962.806824 | -2.642763 | 4.218E-05 | TRIB2                                     |
| 0.000056 | 0.00667  | 933.864746 | 385.313965 | -1.38344  | 0.007567  | ZBTB14                                    |
| 0.000248 | 0.021132 | 686.511108 | 318.385986 | -1.218226 | 0.0177299 | C5orf42                                   |
| 0.047653 | 0.784952 | 284.037415 | 127.16317  | -1.176585 | 0.0471237 | FRMPD3                                    |
| 0.377044 | 0.998659 | 175.034134 | 65.97187   | -1.367433 | 0.0378045 | STOX2                                     |
| 0.000745 | 0.250395 | 560.738098 | 196.959488 | -1.584484 | 0.0050437 | CTNND1   TMX<br>2-CTNND1                  |
| 0.000003 | 0.000031 | 2239.80811 | 1061.28662 | -1.146238 | 0.0157325 | TEAD2                                     |
| 0.003044 | 0.594907 | 441.253723 | 149.153793 | -1.615872 | 0.0057812 | TCTN2                                     |
| 0.000041 | 0.000964 | 1008.28046 | 532.555542 | -1.027516 | 0.0328833 | COL4A5                                    |
| 0.006477 | 0.000072 | 4345.45801 | 1034.51538 | -2.131834 | 0.0483425 | COL1A1                                    |
| 0.00002  | 0.000941 | 1202.18054 | 533.511658 | -1.277352 | 0.0104921 | GNB4                                      |
| 0.000012 | 0.001216 | 1397.12878 | 510.564911 | -1.558199 | 0.0029776 | RPUSD2                                    |
| 0.167175 | 0.987848 | 215.91037  | 83.181923  | -1.355091 | 0.0304168 | ZNF572                                    |
| 0.00001  | 0.000297 | 1461.06335 | 655.894226 | -1.260355 | 0.0104983 | PARP1                                     |
| 0.001596 | 0.153075 | 491.562927 | 222.774582 | -1.228766 | 0.0219255 | MCM3                                      |
| 0.000018 | 0.000485 | 1245.15295 | 599.483521 | -1.159381 | 0.0172849 | RAB20                                     |
| 0.000002 | 0.000025 | 2542.71143 | 1119.6095  | -1.24524  | 0.0096753 | LPCAT1                                    |
| 0.000296 | 0.161878 | 663.452759 | 217.994003 | -1.689192 | 0.0029499 | LONRF1                                    |
| 0.000005 | 0.000049 | 1880.30676 | 949.421265 | -1.06894  | 0.0231871 | KNSTRN                                    |
| 0.001111 | 0.059057 | 523.006165 | 268.66806  | -1.064564 | 0.0387035 | IFIT3                                     |
| 0.000107 | 0.507677 | 811.236023 | 156.802704 | -2.415883 | 0.0064583 | previous<br>version<br>conserved<br>probe |
| 0.000142 | 0.008837 | 766.167358 | 368.103912 | -1.170052 | 0.0203519 | HOXB8                                     |
| 0.000011 | 0.001103 | 1455.82275 | 672.148193 | -1.219558 | 0.0148775 | FRS3                                      |
| 0.000005 | 0.000069 | 1951.57812 | 879.624939 | -1.234062 | 0.0108274 | MAP1A                                     |
| 0.000002 | 0.000051 | 3261.71387 | 940.816223 | -1.86005  | 0.0006391 | PFKFB4                                    |
| 0.000052 | 0.042724 | 952.730713 | 282.05365  | -1.845209 | 0.0012372 | SOX13                                     |
| 0.035852 | 0.821778 | 291.374176 | 122.382599 | -1.266614 | 0.0290224 | IGSF9B                                    |
| 0.000001 | 0.000005 | 3715.54492 | 1839.56348 | -1.072537 | 0.0202505 | GAL3ST3                                   |
| 0.       | 0.000001 | 10592.1855 | 4307.29395 | -1.298761 | 0.0063449 | MARVELD1                                  |
| 0.000007 | 0.000086 | 1672.78125 | 839.46814  | -1.089572 | 0.0215728 | RAB31                                     |

|          |          |            |            |           |           |                                           |
|----------|----------|------------|------------|-----------|-----------|-------------------------------------------|
| 0.267487 | 0.999285 | 192.851974 | 62.147415  | -1.602353 | 0.0176471 | previous<br>version<br>conserved<br>probe |
| 0.000215 | 0.017104 | 833.246338 | 329.859344 | -1.440015 | 0.009663  | SIX3                                      |
| 0.       | 0.000001 | 19184.5801 | 8020.84082 | -1.205455 | 0.0096642 | RAB1A                                     |
| 0.000001 | 0.000005 | 5305.52539 | 1949.5166  | -1.484972 | 0.0028604 | CAPRIN2                                   |
| 0.000034 | 0.004949 | 1054.39722 | 404.436249 | -1.486199 | 0.0046311 | SLC04A1                                   |
| 0.000139 | 0.005997 | 769.311707 | 392.006775 | -1.0883   | 0.0283597 | PDCD11                                    |
| 0.009407 | 0.79252  | 365.789886 | 126.207054 | -1.564942 | 0.0084681 | CALHM2                                    |
| 0.006031 | 0.260189 | 397.233154 | 195.047272 | -1.099102 | 0.041023  | LRFN2                                     |
| 0.000001 | 0.000001 | 8902.63379 | 3624.62842 | -1.30141  | 0.0063378 | SMARCD2                                   |
| 0.000033 | 0.000657 | 1056.49341 | 567.931763 | -1.000146 | 0.0363179 | AURKA                                     |
| 0.000003 | 0.000025 | 2214.65332 | 1124.39014 | -1.047391 | 0.0245833 | SLC2A4RG                                  |
| 0.000022 | 0.000481 | 1182.26648 | 600.439636 | -1.082166 | 0.0246173 | BIRC7                                     |
| 0.000001 | 0.000017 | 3837.12549 | 1250.59717 | -1.680088 | 0.0012802 | PCYOX1L                                   |
| 0.000013 | 0.001694 | 1363.58923 | 482.837585 | -1.60389  | 0.0024962 | PCED1B                                    |
| 0.000926 | 0.215419 | 539.77594  | 204.608414 | -1.478226 | 0.0077651 | ABHD10                                    |
| 0.000038 | 0.005813 | 1026.09827 | 393.918976 | -1.484506 | 0.0047353 | LMBR1L                                    |
| 0.000003 | 0.000016 | 2852.95166 | 1269.71948 | -1.228754 | 0.0116692 | ADCK3                                     |
| 0.000001 | 0.000001 | 7676.34717 | 3372.21436 | -1.194458 | 0.0106423 | PYCR2                                     |
| 0.000001 | 0.000023 | 3374.90967 | 1144.46851 | -1.621781 | 0.0016888 | CPT2                                      |
| 0.000007 | 0.000159 | 1639.24182 | 740.032288 | -1.248071 | 0.0106827 | NRBP2                                     |
| 0.000333 | 0.031619 | 677.078125 | 297.351471 | -1.29391  | 0.0146386 | TUBG2                                     |
| 0.004921 | 0.603352 | 407.714233 | 148.197678 | -1.509571 | 0.009105  | MED7                                      |
| 0.000428 | 0.015417 | 699.08844  | 335.596039 | -1.170425 | 0.027348  | SEC62                                     |
| 0.000959 | 0.011584 | 748.349548 | 351.849976 | -1.199927 | 0.0375558 | SLC25A37                                  |
| 0.245949 | 0.997951 | 197.044418 | 68.84021   | -1.487798 | 0.0233542 | PRDM12                                    |
| 0.000074 | 0.024399 | 879.363098 | 310.737061 | -1.598423 | 0.0033125 | FAM76B                                    |
| 0.001182 | 0.297573 | 517.765625 | 188.354462 | -1.530167 | 0.0066384 | TMEM254                                   |
| 0.000509 | 0.047043 | 600.566223 | 277.273071 | -1.219586 | 0.0191246 | BIVM                                      |
| 0.000001 | 0.000014 | 3526.88525 | 1313.70068 | -1.487027 | 0.0030183 | TM2D3                                     |
| 0.414823 | 0.99892  | 169.793594 | 63.103527  | -1.384916 | 0.0392283 | MESDC1                                    |
| 0.000033 | 0.001034 | 1059.63782 | 524.906616 | -1.11846  | 0.0218748 | LYSMD2                                    |
| 0.000041 | 0.002104 | 1005.13611 | 465.627533 | -1.217519 | 0.0146383 | IGIP                                      |
| 0.000115 | 0.00548  | 799.706848 | 397.743439 | -1.122312 | 0.0241905 | SLC25A43                                  |
| 0.001515 | 0.201678 | 518.813721 | 207.476746 | -1.402459 | 0.0125069 | B3GNT7                                    |
| 0.000002 | 0.000007 | 3341.37012 | 1664.5946  | -1.067832 | 0.0209764 | ZSWIM4                                    |
| 0.00001  | 0.000184 | 1479.92932 | 718.997742 | -1.143151 | 0.0175693 | SEH1L                                     |
| 0.001884 | 0.076916 | 477.9375   | 253.370224 | -1.014501 | 0.0482818 | RAC2                                      |
| 0.00001  | 0.000175 | 1456.87097 | 725.690552 | -1.106682 | 0.02074   | ZNF688                                    |
| 0.00011  | 0.002675 | 858.40094  | 447.461365 | -1.054328 | 0.0338791 | SZT2                                      |
| 0.000014 | 0.000329 | 1465.25574 | 643.464783 | -1.292186 | 0.0102652 | GEMIN4                                    |
| 0.000045 | 0.013459 | 985.222046 | 343.244934 | -1.619105 | 0.0028311 | FZD8                                      |
| 0.000003 | 0.000085 | 2180.06592 | 877.712708 | -1.390957 | 0.0052778 | PPP1R3C                                   |
| 0.       | 0.       | 68665.7891 | 29045.7891 | -1.167891 | 0.0113402 | CCL2                                      |
| 0.000103 | 0.00323  | 828.005798 | 434.075775 | -1.047844 | 0.0330202 | previous<br>version<br>conserved<br>probe |
| 0.001767 | 0.201661 | 483.17804  | 207.476746 | -1.300124 | 0.0164002 | ZNF343                                    |

|          |          |            |            |           |           |                                                     |
|----------|----------|------------|------------|-----------|-----------|-----------------------------------------------------|
| 0.000211 | 0.021131 | 710.617615 | 318.385986 | -1.266512 | 0.014399  | previous<br>version<br>conserved<br>probe           |
| 0.000024 | 0.001068 | 1152.91943 | 522.038269 | -1.24834  | 0.0120974 | IRF5                                                |
| 0.000003 | 0.000027 | 2325.75293 | 1137.77576 | -1.098283 | 0.0194909 | RAX2                                                |
| 0.000006 | 0.001511 | 1731.47534 | 497.179321 | -1.904393 | 0.0006875 | CBX7                                                |
| 0.006241 | 0.729527 | 401.425598 | 133.855972 | -1.624207 | 0.0073053 | BPIFA3                                              |
| 0.00002  | 0.000449 | 1208.46924 | 609.044678 | -1.093257 | 0.023316  | FRMD8<br>previous<br>version<br>conserved<br>probe  |
| 0.001131 | 0.038103 | 536.631592 | 287.790344 | -1.005944 | 0.0497751 |                                                     |
| 0.000024 | 0.000627 | 1148.72705 | 572.712341 | -1.108994 | 0.022136  | DUT                                                 |
| 0.000002 | 0.000019 | 3262.76196 | 1273.54395 | -1.418928 | 0.0045324 | DLG1-AS1                                            |
| 0.006505 | 0.488121 | 388.848297 | 161.583282 | -1.321612 | 0.0182777 | CEP57L1                                             |
| 0.067194 | 0.926379 | 259.930939 | 105.172546 | -1.301416 | 0.0292009 | CCDC89                                              |
| 0.000004 | 0.000107 | 2097.26538 | 802.179688 | -1.470964 | 0.0037299 | PARS2                                               |
| 0.000257 | 0.01033  | 681.270569 | 358.542755 | -1.042335 | 0.0361165 | OAF<br>previous<br>version<br>conserved<br>probe    |
| 0.000097 | 0.334203 | 830.10199  | 200.783951 | -2.113807 | 0.0013563 |                                                     |
| 0.000014 | 0.000072 | 2009.22412 | 871.976013 | -1.287444 | 0.0125697 | PPP1R35                                             |
| 0.004464 | 0.934859 | 510.428864 | 103.260315 | -2.325768 | 0.0026482 | PKD1L2                                              |
| 0.000001 | 0.000001 | 9553.50977 | 4586.479   | -1.057843 | 0.0201527 | KCNS3                                               |
| 0.000006 | 0.000061 | 1759.77429 | 906.396118 | -1.045923 | 0.0259217 | RIMKLA                                              |
| 0.012517 | 0.769518 | 349.020142 | 129.075394 | -1.464347 | 0.0125308 | IRAK2                                               |
| 0.000003 | 0.00002  | 2301.64648 | 1183.66919 | -1.02688  | 0.0268015 | MTMR11                                              |
| 0.000001 | 0.000007 | 3539.46265 | 1612.0083  | -1.197519 | 0.011371  | EIF1AD                                              |
| 0.000053 | 0.004351 | 948.538269 | 413.04126  | -1.308628 | 0.0102364 | HDHD1                                               |
| 0.000023 | 0.000696 | 1162.35242 | 562.195068 | -1.152863 | 0.0182238 | HSPA2                                               |
| 0.000099 | 0.001501 | 923.383667 | 494.310974 | -1.012312 | 0.0414346 | NUDT8                                               |
| 0.000021 | 0.000615 | 1193.79565 | 584.185669 | -1.135911 | 0.019617  | MDC1                                                |
| 0.00001  | 0.001969 | 1472.59253 | 471.364227 | -1.749854 | 0.0013416 | SLC26A6                                             |
| 0.000002 | 0.000013 | 2671.62866 | 1343.34021 | -1.052433 | 0.0232682 | TMEM8B<br>previous<br>version<br>conserved<br>probe |
| 0.000056 | 0.250317 | 942.249634 | 196.959488 | -2.317081 | 0.0002768 |                                                     |
| 0.000001 | 0.000006 | 3578.24268 | 1693.27795 | -1.142059 | 0.0147098 | LRFN4                                               |
| 0.000019 | 0.001587 | 1216.854   | 627.210815 | -1.060713 | 0.0315926 | CNDP2                                               |
| 0.001004 | 0.175398 | 564.930542 | 214.169556 | -1.482037 | 0.009102  | MAPK7                                               |
| 0.000444 | 0.093974 | 615.239746 | 243.809082 | -1.429629 | 0.0082954 | PIGN                                                |
| 0.000009 | 0.000157 | 1505.08386 | 741.944519 | -1.120819 | 0.0192996 | AARS2                                               |
| 0.       | 0.000001 | 20953.7871 | 9193.99316 | -1.135518 | 0.0135019 | LRP1                                                |
| 0.000002 | 0.00004  | 2801.59424 | 997.226929 | -1.55314  | 0.0023776 | METTL3<br>previous<br>version<br>conserved<br>probe |
| 0.000002 | 0.000593 | 3436.74805 | 580.361206 | -2.648272 | 6.782E-05 |                                                     |
| 0.085112 | 0.942711 | 248.401733 | 101.348091 | -1.285235 | 0.0321777 | DCAKD                                               |
| 0.000001 | 0.000005 | 4503.72266 | 1906.49146 | -1.292459 | 0.0071906 | ZMYND8                                              |
| 0.000016 | 0.000408 | 1284.98108 | 618.605774 | -1.159446 | 0.0171137 | SMC1A                                               |

|          |          |            |            |           |           |           |
|----------|----------|------------|------------|-----------|-----------|-----------|
| 0.000113 | 0.0038   | 802.851196 | 422.602417 | -1.04345  | 0.0334682 | RRM2      |
| 0.000001 | 0.000002 | 5809.66602 | 2825.31714 | -1.058109 | 0.0209091 | MEGF9     |
| 0.000003 | 0.000026 | 2190.54688 | 1108.13623 | -1.05317  | 0.0240077 | MNT       |
| 0.01101  | 0.737648 | 356.356903 | 132.899857 | -1.455893 | 0.0125525 | LAMA1     |
| 0.182341 | 0.974627 | 211.717926 | 90.830833  | -1.198088 | 0.0493934 | ZNF320    |
| 0.000027 | 0.000609 | 1112.04321 | 575.580688 | -1.054852 | 0.0282647 | CA12      |
| 0.000018 | 0.000753 | 1233.62378 | 554.546143 | -1.258705 | 0.0112593 | RAB22A    |
| 0.005041 | 0.255203 | 405.618011 | 196.003387 | -1.123722 | 0.0358577 | TMEM101   |
| 0.000004 | 0.000154 | 2076.30298 | 744.812866 | -1.567305 | 0.0024467 | ADAM19    |
| 0.000001 | 0.000022 | 4636.83252 | 1157.85413 | -2.057985 | 0.0002771 | NUP210    |
| 0.000004 | 0.000007 | 3511.16382 | 1646.42834 | -1.155463 | 0.0181046 | TNFRSF25  |
| 0.001744 | 0.475378 | 484.226166 | 163.495499 | -1.625157 | 0.0059648 | ASB13     |
| 0.001884 | 0.080038 | 477.9375   | 251.457993 | -1.024735 | 0.0464646 | TUBB2B    |
| 0.000062 | 0.012379 | 914.998779 | 348.025513 | -1.496416 | 0.0048309 | LOC283050 |
| 0.000123 | 0.075524 | 788.177673 | 254.32634  | -1.721977 | 0.0022578 | C5orf45   |
| 0.000436 | 0.0489   | 668.693298 | 275.36084  | -1.383312 | 0.0116635 | ACPL2     |
| 0.000001 | 0.000004 | 5055.02783 | 2017.40063 | -1.367021 | 0.0049193 | WSB1      |
| 0.000001 | 0.000002 | 6532.86084 | 3281.38354 | -1.004964 | 0.0264476 | PRKCB     |
| 0.000006 | 0.000078 | 1725.18677 | 857.634277 | -1.100563 | 0.0203822 | TMEM150A  |
| 0.000039 | 0.010149 | 1016.66534 | 360.454987 | -1.595031 | 0.0030591 | FBP1      |
| 0.000218 | 0.012176 | 703.280884 | 348.981628 | -1.124406 | 0.025532  | CNPY4     |
| 0.000852 | 0.066924 | 558.641846 | 260.063019 | -1.203667 | 0.0224641 | ARHGFB6   |
| 0.000082 | 0.004948 | 859.449036 | 404.436249 | -1.199909 | 0.0169537 | HMGA2     |
| 0.000594 | 0.080038 | 583.796448 | 251.457993 | -1.31246  | 0.0135552 | CCBL1     |
| 0.003282 | 0.193821 | 440.205597 | 209.388977 | -1.153781 | 0.031395  | FBX09     |
| 0.000215 | 0.068267 | 705.377075 | 259.106903 | -1.541534 | 0.0048543 | CHD7      |
| 0.000061 | 0.037392 | 922.335571 | 288.746429 | -1.767236 | 0.0017077 | PHF15     |
| 0.00026  | 0.1173   | 680.222473 | 233.291824 | -1.632499 | 0.0035527 | ALK       |
| 0.001535 | 0.071119 | 593.229431 | 257.194672 | -1.305039 | 0.0238098 | STRIP2    |
| 0.000001 | 0.000006 | 3539.46265 | 1745.86426 | -1.080469 | 0.0196359 | PNISR     |
| 0.000001 | 0.000003 | 4446.07666 | 2226.78955 | -1.042135 | 0.0228966 | DGCR2     |
| 0.003405 | 0.143468 | 432.868835 | 223.730682 | -1.040119 | 0.0465571 | NA        |
| 0.000002 | 0.000015 | 2646.47412 | 1284.06116 | -1.103712 | 0.0184075 | C1RL      |
| 0.00246  | 0.140643 | 456.975342 | 224.686798 | -1.112296 | 0.0344437 | COL6A1    |
| 0.008266 | 0.96509  | 422.387756 | 94.655289  | -2.179026 | 0.0031016 | SEMA4B    |
| 0.000003 | 0.000028 | 2226.18262 | 1088.05774 | -1.101896 | 0.0191601 | GLT25D1   |
| 0.002494 | 0.101831 | 455.927246 | 239.984634 | -1.020018 | 0.0485956 | CTF1      |
| 0.00005  | 0.00248  | 957.971252 | 453.198059 | -1.189437 | 0.0168386 | PTPRB     |
| 0.000001 | 0.000007 | 5767.7417  | 1612.0083  | -1.882432 | 0.0005174 | RARB      |
| 0.000001 | 0.000008 | 6501.41748 | 1559.422   | -2.095304 | 0.0002274 | ANKZF1    |
| 0.000001 | 0.000011 | 3909.44507 | 1726.74194 | -1.241036 | 0.0094983 | RCN3      |
| 0.000006 | 0.000633 | 1797.50623 | 571.756226 | -1.75406  | 0.0011975 | OBSCN     |
| 0.000001 | 0.000005 | 3885.33838 | 1906.49146 | -1.083776 | 0.0191134 | HPS4      |
| 0.062992 | 0.921897 | 263.075256 | 106.128662 | -1.306875 | 0.0283172 | CEP152    |
| 0.000394 | 0.020391 | 628.865173 | 320.298218 | -1.085221 | 0.0316528 | PI4K2B    |
| 0.014423 | 0.496039 | 340.635284 | 160.627167 | -1.131764 | 0.039787  | SEMA4G    |
| 0.000612 | 0.143488 | 580.652161 | 223.730682 | -1.462515 | 0.0076709 | KIAA0895L |
| 0.000006 | 0.002541 | 1773.39966 | 451.285828 | -2.077767 | 0.0003624 | FAM178A   |
| 0.000152 | 0.143487 | 755.686279 | 223.730682 | -1.836222 | 0.0015515 | MESP1     |
| 0.000047 | 0.001959 | 974.740967 | 471.364227 | -1.156836 | 0.0192011 | KIFC2     |
| 0.00004  | 0.00123  | 1174.92969 | 509.608795 | -1.31055  | 0.0114157 | ASB16-AS1 |
| 0.000192 | 0.024852 | 721.098694 | 309.780945 | -1.325096 | 0.0111818 | TIGD7     |
| 0.000003 | 0.000026 | 2275.4436  | 1105.26782 | -1.109674 | 0.0184123 | WSB2      |

|          |          |            |            |           |           |                                                        |
|----------|----------|------------|------------|-----------|-----------|--------------------------------------------------------|
| 0.000032 | 0.011774 | 1071.16699 | 350.89386  | -1.706474 | 0.0019085 | previous<br>version<br>conserved<br>probe              |
| 0.000005 | 0.000078 | 1989.31006 | 858.590393 | -1.296613 | 0.008353  | FBX046                                                 |
| 0.000001 | 0.000011 | 3457.71021 | 1421.74158 | -1.344514 | 0.0057785 | CELSR2                                                 |
| 0.       | 0.000001 | 13350.8066 | 5744.33301 | -1.185784 | 0.0107589 | TCEA1                                                  |
| 0.000003 | 0.000046 | 2350.90747 | 964.719055 | -1.355186 | 0.0059808 | SLC2A1                                                 |
| 0.000002 | 0.000029 | 2660.09961 | 1074.67224 | -1.367488 | 0.0054906 | PFKFB3<br>previous<br>version<br>conserved<br>probe    |
| 0.000016 | 0.000738 | 1283.93298 | 556.458374 | -1.311499 | 0.0088177 | previous<br>version<br>conserved<br>probe              |
| 0.00008  | 0.002573 | 863.641479 | 450.329712 | -1.053595 | 0.0311387 | previous<br>version<br>conserved<br>probe              |
| 0.001959 | 0.090271 | 474.793182 | 245.721313 | -1.046417 | 0.0430071 | NA                                                     |
| 0.00004  | 0.000754 | 1047.06042 | 554.546143 | -1.021758 | 0.034452  | DHRS13                                                 |
| 0.011657 | 0.391615 | 354.260712 | 174.012756 | -1.0821   | 0.0465722 | ERO1L                                                  |
| 0.000001 | 0.000016 | 5623.10254 | 1258.24609 | -2.204183 | 0.0001603 | CYP24A1                                                |
| 0.000002 | 0.000009 | 3309.927   | 1519.26526 | -1.18568  | 0.012139  | CCNL2                                                  |
| 0.000133 | 0.197698 | 775.600342 | 208.432861 | -1.968288 | 0.0009641 | TMEM121<br>previous<br>version<br>conserved<br>probe   |
| 0.000082 | 0.043559 | 859.449036 | 281.097534 | -1.705767 | 0.0022354 | previous<br>version<br>conserved<br>probe              |
| 0.001484 | 0.186233 | 497.851562 | 211.301208 | -1.318474 | 0.0149708 | PDGFA                                                  |
| 0.00013  | 0.377905 | 779.792786 | 175.924988 | -2.204876 | 0.0004545 | INSIG1                                                 |
| 0.000392 | 0.02485  | 629.913269 | 309.780945 | -1.134041 | 0.0260641 | ZNF766<br>previous<br>version<br>conserved<br>probe    |
| 0.000534 | 0.081655 | 603.710571 | 250.501877 | -1.365843 | 0.011234  | previous<br>version<br>conserved<br>probe              |
| 0.000001 | 0.000001 | 10061.8428 | 4196.38477 | -1.264997 | 0.0074711 | AKR1C3<br>previous<br>version<br>conserved<br>probe    |
| 0.004736 | 0.628808 | 409.810455 | 145.32933  | -1.543712 | 0.0079983 | previous<br>version<br>conserved<br>probe              |
| 0.000001 | 0.000002 | 6932.18994 | 2991.68091 | -1.221511 | 0.0094299 | KANK2<br>AKR1C1 AKR<br>1C3 LOC101<br>060798 AKR<br>1C4 |
| 0.000063 | 0.063605 | 910.806335 | 395.831207 | -1.311016 | 0.0240479 | AKR1C1 AKR<br>1C3 LOC101<br>060798 AKR<br>1C4          |
| 0.000002 | 0.000008 | 3166.33594 | 1535.51917 | -1.106085 | 0.0176946 | VPS13C                                                 |
| 0.000008 | 0.000104 | 1608.84668 | 806.00415  | -1.094096 | 0.0213555 | FAM189B                                                |
| 0.       | 0.000001 | 11255.6377 | 4401.94922 | -1.350199 | 0.004962  | TUBB                                                   |
| 0.001221 | 0.265291 | 514.621338 | 194.091156 | -1.480879 | 0.0079637 | ZNF700                                                 |
| 0.000122 | 0.011583 | 789.225769 | 351.849976 | -1.274334 | 0.0130187 | JUNB                                                   |
| 0.000025 | 0.001755 | 1141.39026 | 479.969269 | -1.355413 | 0.0076817 | PNKD                                                   |
| 0.       | 0.000001 | 22925.2793 | 9912.99023 | -1.157723 | 0.0121041 | NREP                                                   |
| 0.001037 | 0.218279 | 529.294861 | 203.652298 | -1.456354 | 0.0084972 | ZFP62                                                  |
| 0.000009 | 0.075617 | 1520.80554 | 254.32634  | -2.658797 | 7.349E-05 | FANCF                                                  |

|          |          |            |            |           |           |                                                                                                                                     |
|----------|----------|------------|------------|-----------|-----------|-------------------------------------------------------------------------------------------------------------------------------------|
| 0.000077 | 0.030296 | 869.930115 | 301.175934 | -1.62679  | 0.003019  | LOC1009968<br>72                                                                                                                    |
| 0.000031 | 0.000472 | 1247.24927 | 602.351868 | -1.154904 | 0.0207812 | MMP15                                                                                                                               |
| 0.186294 | 0.997645 | 210.66983  | 69.796326  | -1.570504 | 0.0169636 | SLFN5                                                                                                                               |
| 0.035136 | 0.946349 | 292.422302 | 100.391975 | -1.545116 | 0.0118492 | STAMBPL1                                                                                                                            |
| 0.000947 | 0.260206 | 537.679688 | 195.047272 | -1.537276 | 0.006224  | ERCC6                                                                                                                               |
| 0.000074 | 0.300611 | 879.363098 | 188.354462 | -2.280787 | 0.0003263 | RTP4                                                                                                                                |
| 0.029899 | 0.696451 | 300.807159 | 137.68042  | -1.154696 | 0.0407838 | ZNF280B                                                                                                                             |
| 0.000642 | 0.006382 | 981.029602 | 389.138428 | -1.438642 | 0.0206798 | previous<br>version<br>conserved<br>probe                                                                                           |
| 0.000001 | 0.000004 | 4623.20703 | 1998.27832 | -1.25815  | 0.0082751 | GNAI2                                                                                                                               |
| 0.003664 | 0.377908 | 427.628296 | 175.924988 | -1.347322 | 0.0152938 | MMD                                                                                                                                 |
| 0.000664 | 0.027727 | 641.442444 | 304.044281 | -1.186116 | 0.0273051 | HMGXB4                                                                                                                              |
| 0.000052 | 0.000749 | 1620.37585 | 753.417847 | -1.204696 | 0.0266467 | FBXO2                                                                                                                               |
| 0.000045 | 0.001177 | 1052.30103 | 513.433228 | -1.140403 | 0.0217867 | EDEM1                                                                                                                               |
| 0.000005 | 0.000066 | 2021.80139 | 890.142212 | -1.265459 | 0.0101479 | TTL4                                                                                                                                |
| 0.066573 | 0.951271 | 262.02713  | 98.479744  | -1.408601 | 0.0224883 | ZNF680                                                                                                                              |
| 0.001311 | 0.17541  | 508.332672 | 214.169556 | -1.330222 | 0.0140709 | GLCE                                                                                                                                |
| 0.000004 | 0.000041 | 2079.44751 | 989.578064 | -1.147082 | 0.0159103 | GLE1                                                                                                                                |
| 0.000031 | 0.000849 | 1076.40747 | 543.072754 | -1.091915 | 0.0243874 | MAP3K12                                                                                                                             |
| 0.000019 | 0.000437 | 1214.75781 | 610.956909 | -1.096222 | 0.0229561 | NA                                                                                                                                  |
| 0.000192 | 0.036691 | 721.098694 | 289.702545 | -1.418275 | 0.0077149 | TMEM168                                                                                                                             |
| 0.000003 | 0.000031 | 2275.4436  | 1062.24268 | -1.166849 | 0.0141782 | POLRMT                                                                                                                              |
| 0.000006 | 0.000064 | 1775.49597 | 893.966614 | -1.07879  | 0.0223232 | MED20                                                                                                                               |
| 0.000051 | 0.002324 | 956.923157 | 457.978638 | -1.172718 | 0.0181082 | PAPLN                                                                                                                               |
| 0.000015 | 0.000226 | 1313.28003 | 696.051025 | -1.018681 | 0.0315412 | INF2                                                                                                                                |
| 0.000608 | 0.103953 | 582.748352 | 239.028519 | -1.378353 | 0.0106152 | ACAD10                                                                                                                              |
| 0.00157  | 0.077307 | 823.813354 | 344.20105  | -1.364906 | 0.0466924 | FAM86DP FA<br>M86HP FAM8<br>6B1 FAM86F<br>P FAM86C1 <br>FAM86JP FA<br>M86A FAM86<br>EP<br>previous<br>version<br>conserved<br>probe |
| 0.000005 | 0.000052 | 1871.92188 | 938.903992 | -1.079294 | 0.0220152 | FAM102A                                                                                                                             |
| 0.000001 | 0.00001  | 6831.57178 | 1477.19617 | -2.242977 | 0.000135  | GOLGA8B GO<br>LG8A                                                                                                                  |
| 0.000001 | 0.000002 | 5127.34717 | 2559.51733 | -1.030185 | 0.0239582 | TUBGCP5                                                                                                                             |
| 0.008634 | 0.405642 | 371.030426 | 172.100525 | -1.166166 | 0.0329899 | GDF6                                                                                                                                |
| 0.000056 | 0.004001 | 935.960938 | 418.777954 | -1.270772 | 0.0120822 | LOC151009                                                                                                                           |
| 0.000018 | 0.002892 | 1232.57568 | 441.724701 | -1.586682 | 0.0028209 | previous<br>version<br>conserved<br>probe                                                                                           |
| 0.000238 | 0.028768 | 691.751648 | 302.13205  | -1.301729 | 0.0126038 | MGC57346                                                                                                                            |
| 0.008934 | 0.39854  | 368.934204 | 173.056641 | -1.150213 | 0.03503   | PWWP2A                                                                                                                              |
| 0.003558 | 0.140622 | 429.724518 | 224.686798 | -1.023874 | 0.0496358 | AHNAK2                                                                                                                              |
| 0.       | 0.000001 | 13255.4287 | 6263.50293 | -1.045502 | 0.0210925 | FAM178A                                                                                                                             |
| 0.000001 | 0.000007 | 6239.39014 | 1621.56946 | -1.982304 | 0.0003469 |                                                                                                                                     |

|          |          |            |            |           |           |                                                                                                  |
|----------|----------|------------|------------|-----------|-----------|--------------------------------------------------------------------------------------------------|
| 0.000588 | 0.022293 | 584.844604 | 315.517639 | -1.001768 | 0.0456057 | PPP6R2                                                                                           |
| 0.015196 | 0.419904 | 362.645569 | 170.188309 | -1.147089 | 0.0488478 | LOC643696                                                                                        |
| 0.000048 | 0.010328 | 968.452332 | 358.542755 | -1.534454 | 0.0040028 | ZC3H12D                                                                                          |
| 0.001894 | 0.520146 | 482.129944 | 157.75882  | -1.667301 | 0.0046114 | FUT11                                                                                            |
| 0.000007 | 0.000138 | 1626.66455 | 761.066772 | -1.195281 | 0.0135448 | LRRC8E                                                                                           |
| 0.000303 | 0.088466 | 660.308411 | 246.677429 | -1.515497 | 0.0056486 | ZFP62                                                                                            |
| 0.000005 | 0.00004  | 1941.09705 | 998.183044 | -1.03866  | 0.0262332 | MST1 MST1P<br>2                                                                                  |
| 0.000001 | 0.000017 | 5153.5498  | 1249.64111 | -2.093824 | 0.0002381 | HILPDA                                                                                           |
| 0.059145 | 0.907487 | 267.2677   | 108.997002 | -1.294423 | 0.0299924 | RORC                                                                                             |
| 0.000007 | 0.000061 | 1703.17639 | 906.396118 | -1.000553 | 0.0319665 | VHLL                                                                                             |
| 0.004594 | 0.338935 | 411.906677 | 181.661667 | -1.249364 | 0.0224942 | GNL3L                                                                                            |
| 0.000001 | 0.000039 | 4254.27295 | 1001.05139 | -2.151462 | 0.0002029 | previous<br>version<br>conserved<br>probe<br>FAM86C1 FA<br>M86DP FAM8<br>6B1 FAM86F<br>P FAM86HP |
| 0.000048 | 0.007036 | 968.452332 | 390.094543 | -1.417177 | 0.0066015 |                                                                                                  |
| 0.000003 | 0.002414 | 2347.76318 | 455.110291 | -2.45494  | 9.55E-05  | SKP2                                                                                             |
| 0.009261 | 0.528292 | 366.838013 | 156.802704 | -1.275189 | 0.0227124 | ERGIC2                                                                                           |
| 0.084744 | 0.912454 | 253.642273 | 108.040886 | -1.22665  | 0.0451179 | MYL2                                                                                             |
| 0.025647 | 0.679663 | 309.192017 | 139.592651 | -1.177111 | 0.0371487 | previous<br>version<br>conserved<br>probe                                                        |
| 0.000981 | 0.044404 | 534.5354   | 280.141418 | -1.037773 | 0.0415678 | NARG2                                                                                            |
| 0.03812  | 0.965079 | 288.229858 | 94.655289  | -1.608418 | 0.0099233 | MEX3A                                                                                            |
| 0.000014 | 0.000198 | 1339.48279 | 708.48053  | -1.020929 | 0.031316  | LOC727849 <br>LOC388152                                                                          |
| 0.000001 | 0.000011 | 3388.53491 | 1418.87329 | -1.318136 | 0.0065465 | NA<br>FAM86A FAM<br>86C2P FAM8<br>6C1 FAM86D<br>P FAM86HP <br>FAM86EP FA<br>M86JP                |
| 0.422673 | 0.998445 | 168.745483 | 64.059639  | -1.353719 | 0.0448493 |                                                                                                  |
| 0.00001  | 0.00123  | 1517.66125 | 509.608795 | -1.680521 | 0.0018275 | PP7080                                                                                           |
| 0.000033 | 0.001345 | 1057.5415  | 501.959869 | -1.180292 | 0.0167918 | PAG1                                                                                             |
| 0.00031  | 0.071468 | 661.356506 | 258.150787 | -1.456366 | 0.0072844 | CEP44                                                                                            |
| 0.003946 | 0.611851 | 422.387756 | 147.241562 | -1.570511 | 0.0070589 | CBX2                                                                                             |
| 0.000503 | 0.205185 | 601.614319 | 225.642914 | -1.50202  | 0.0099508 | PPM1A                                                                                            |
| 0.000011 | 0.000498 | 1435.90869 | 596.615173 | -1.37235  | 0.0064871 | HNRNPA3                                                                                          |
| 0.00003  | 0.051844 | 1084.79236 | 272.492493 | -2.076366 | 0.000502  | HNRNPA2B1                                                                                        |
| 0.       | 0.000003 | 12703.0762 | 2154.125   | -2.560211 | 4.695E-05 | MALAT1                                                                                           |
| 0.012229 | 0.891443 | 351.116364 | 111.865341 | -1.66714  | 0.0065402 | ZEB1-AS1                                                                                         |
| 0.000001 | 0.000006 | 3895.81958 | 1728.65417 | -1.234319 | 0.0094767 | C16orf46                                                                                         |
| 0.003664 | 0.371198 | 427.628296 | 176.881104 | -1.340001 | 0.015702  | TMOD2                                                                                            |
| 0.000015 | 0.001385 | 1314.32812 | 567.931763 | -1.315781 | 0.0095268 | CCSAP                                                                                            |
| 0.001658 | 0.52829  | 488.41861  | 156.802704 | -1.694172 | 0.0039471 | previous<br>version<br>conserved<br>probe                                                        |

|          |          |            |            |            |           |           |         |
|----------|----------|------------|------------|------------|-----------|-----------|---------|
| 0.000002 | 0.000018 | 3213.50098 | 1226.69434 | -1.450853  | 0.0036178 | LOC642852 |         |
| 0.006106 | 0.351576 | 393.04071  | 179.749435 | -1.193574  | 0.0285848 | SMAD2     |         |
| 0.000003 | 0.000017 | 2556.33691 | 1248.68494 | -1.09554   | 0.0200299 | DPP9      |         |
| 0.035852 | 0.800006 | 291.374176 | 125.250938 | -1.235232  | 0.0321614 | CCR6      |         |
|          |          |            |            |            |           | previous  |         |
| 0.000238 | 0.017988 | 691.751648 | 328.903229 | -1.183675  | 0.0204208 | version   |         |
|          |          |            |            |            |           | conserved |         |
|          |          |            |            |            |           | probe     |         |
| 0.000001 | 0.00001  | 6293.89209 | 1473.3717  | -2.132306  | 0.0002002 | HK2       |         |
| 0.000011 | 0.007394 | 1440.1012  | 391.050659 | -1.983598  | 0.0005826 | GPCPD1    |         |
| 0.321772 | 0.997648 | 183.419006 | 69.796326  | -1.357938  | 0.0365712 | C20orf118 |         |
|          | 0.       | 0.000001   | 10830.1055 | 5163.97217 | -1.056279 | 0.0201878 | FASN    |
| 0.001637 | 0.07102  | 489.466705 | 257.194672 | -1.028543  | 0.0451859 | B4GALNT4  |         |
|          |          |            |            |            |           | previous  |         |
|          |          |            |            |            |           | version   |         |
| 0.00073  | 0.029858 | 562.83429  | 300.219818 | -1.015709  | 0.0440355 | conserved |         |
|          |          |            |            |            |           | probe     |         |
| 0.00008  | 0.02897  | 862.593384 | 302.13205  | -1.610533  | 0.00321   | ZBTB3     |         |
| 0.000112 | 0.004172 | 803.899292 | 415.909607 | -1.067526  | 0.0302679 | NLRP2     |         |
| 0.000001 | 0.000006 | 3712.40063 | 1702.83911 | -1.186966  | 0.0118632 | TG        |         |
|          |          |            |            |            |           | previous  |         |
| 0.156637 | 0.978657 | 219.054688 | 88.91861   | -1.281062  | 0.0372602 | version   |         |
|          |          |            |            |            |           | conserved |         |
|          |          |            |            |            |           | probe     |         |
| 0.000001 | 0.000001 | 7849.28516 | 3627.49683 | -1.121313  | 0.0150536 | TMED1     |         |
| 0.000001 | 0.000007 | 3428.36304 | 1595.75439 | -1.165896  | 0.0132399 | SPINT3    |         |
| 0.000051 | 0.063071 | 954.826904 | 262.931366 | -1.945385  | 0.0008663 | ZNF500    |         |
| 0.000004 | 0.000064 | 2005.03174 | 893.966614 | -1.247527  | 0.0101179 | PLEKHG3   |         |
| 0.000086 | 0.03884  | 850.016052 | 286.834229 | -1.662234  | 0.0026566 | TXLNG2P   |         |
| 0.000812 | 0.095865 | 552.35321  | 242.852966 | -1.279875  | 0.0159937 | ZNF341    |         |
| 0.000002 | 0.000025 | 3166.33594 | 1115.78516 | -1.565885  | 0.0021829 | IGF2BP3   |         |
| 0.005119 | 0.688042 | 404.569916 | 138.636536 | -1.588336  | 0.0069734 | GMPR      |         |
| 0.000074 | 0.001616 | 950.63446  | 486.662048 | -1.075574  | 0.0302358 | PRSS53    |         |
| 0.000019 | 0.000065 | 1828.94946 | 892.054382 | -1.123139  | 0.0252695 | C16orf74  |         |
| 0.000004 | 0.000009 | 3230.27075 | 1525.00195 | -1.144951  | 0.0187023 | ANKRD9    |         |
|          |          |            |            |            |           | previous  |         |
| 0.000003 | 0.000025 | 2536.42285 | 1115.78516 | -1.24673   | 0.0097016 | version   |         |
|          |          |            |            |            |           | conserved |         |
|          |          |            |            |            |           | probe     |         |
| 0.000085 | 0.003945 | 853.1604   | 419.73407  | -1.138008  | 0.022003  | OR1N2     |         |
| 0.000063 | 0.082496 | 908.710144 | 250.501877 | -1.94154   | 0.0009188 | OR52A5    |         |
| 0.000003 | 0.000832 | 2407.50537 | 544.984985 | -2.228986  | 0.0001887 | C19orf70  |         |
| 0.000038 | 0.00119  | 1022.95398 | 512.477112 | -1.103352  | 0.023646  | OR4K17    |         |
| 0.000004 | 0.00008  | 2015.51282 | 852.85376  | -1.324738  | 0.0071383 | OR4K5     |         |
| 0.000065 | 0.003173 | 904.5177   | 435.031891 | -1.168315  | 0.0188791 | RPL13AP3  |         |
| 0.000001 | 0.000007 | 3523.74097 | 1642.604   | -1.163993  | 0.0133042 | TNFAIP8L3 |         |
| 0.001244 | 0.45107  | 518.813721 | 166.363846 | -1.700817  | 0.0039874 | ZNF285    |         |
| 0.000001 | 0.000006 | 5034.06543 | 1721.96143 | -1.598417  | 0.0017317 | IER5L     |         |
|          | 0.00023  | 0.008263   | 695.944092 | 371.928375 | -1.021183 | 0.0389437 | C9orf37 |
| 0.003466 | 0.594906 | 449.63858  | 149.153793 | -1.642942  | 0.0064702 | C5orf54   |         |
| 0.000264 | 0.008808 | 679.174377 | 368.103912 | -1.001429  | 0.042754  | PLEKH02   |         |
| 0.000012 | 0.0008   | 1689.55103 | 548.809448 | -1.727383  | 0.0018868 | C8orf58   |         |
| 0.000018 | 0.001818 | 1255.63403 | 477.100922 | -1.501971  | 0.0039931 | FAM69A    |         |
| 0.000176 | 0.027222 | 733.676025 | 305.000397 | -1.370914  | 0.0092041 | C20orf96  |         |



|          |          |            |            |           |           |                                           |
|----------|----------|------------|------------|-----------|-----------|-------------------------------------------|
| 0.000143 | 0.885964 | 766.167358 | 112.821457 | -2.781815 | 0.0001064 | previous<br>version<br>conserved<br>probe |
| 0.000017 | 0.000494 | 1258.77844 | 597.571289 | -1.179736 | 0.0157551 | ESRRA                                     |
| 0.000008 | 0.000404 | 1643.4342  | 619.56189  | -1.512846 | 0.0034517 | BLOC1S5 EE<br>F1E1-MUTED                  |
| 0.000002 | 0.000007 | 3284.77222 | 1595.75439 | -1.103893 | 0.0177808 | NCAPD2                                    |
| 0.000001 | 0.000001 | 10264.127  | 4856.10352 | -1.073753 | 0.0186154 | WDFY1                                     |
| 0.000014 | 0.000261 | 1331.0979  | 672.148193 | -1.090097 | 0.0229086 | CXCL2                                     |
| 0.000001 | 0.000002 | 8490.72754 | 3203.93823 | -1.411276 | 0.0037999 | STRADB                                    |
| 0.000003 | 0.000607 | 2406.45728 | 576.536804 | -2.146928 | 0.0002481 | MMP11                                     |
| 0.34172  | 0.998667 | 180.274673 | 65.97187   | -1.412703 | 0.0321884 | SLC25A15                                  |
| 0.004988 | 0.852967 | 406.666138 | 117.602028 | -1.818957 | 0.0033476 | CCL7                                      |
| 0.000023 | 0.00813  | 1161.30432 | 372.884491 | -1.738734 | 0.0016007 | IFI44                                     |
| 0.000001 | 0.000008 | 4027.88135 | 1546.99255 | -1.444125 | 0.0035718 | DYNLT3                                    |
| 0.000004 | 0.00003  | 2117.17944 | 1100.4873  | -1.015864 | 0.0296559 | MST1                                      |
| 0.000002 | 0.000017 | 2924.2229  | 1234.34326 | -1.305201 | 0.0071719 | PWP2                                      |
| 0.000001 | 0.000005 | 4236.45508 | 1806.09949 | -1.289107 | 0.0072366 | previous<br>version<br>conserved<br>probe |
| 0.001044 | 0.004057 | 898.229065 | 417.821838 | -1.21638  | 0.0446042 | previous<br>version<br>conserved<br>probe |
| 0.000001 | 0.000006 | 3479.72046 | 1764.0304  | -1.040298 | 0.0238321 | previous<br>version<br>conserved<br>probe |
| 0.00008  | 0.052862 | 863.641479 | 271.536377 | -1.760694 | 0.0018161 | C1QTNF6                                   |
| 0.       | 0.000001 | 10908.7139 | 4647.67041 | -1.224989 | 0.0090009 | ANP32A                                    |
| 0.000007 | 0.000922 | 1703.17639 | 535.423889 | -1.774267 | 0.0011328 | HIC1                                      |
| 0.000007 | 0.011211 | 1647.62671 | 353.762207 | -2.317529 | 0.0001737 | IFIT1                                     |
| 0.000254 | 0.110396 | 683.366821 | 236.160172 | -1.622444 | 0.0036787 | CCNL2                                     |
| 0.000098 | 0.00278  | 828.005798 | 444.593048 | -1.013196 | 0.0374816 | UBA5                                      |
| 0.000011 | 0.004877 | 1420.18713 | 405.392365 | -1.913387 | 0.0007355 | ARHGAP5                                   |
| 0.000025 | 0.000627 | 1133.00537 | 572.712341 | -1.089075 | 0.0242352 | DTWD1                                     |
| 0.000003 | 0.000184 | 2357.19629 | 718.997742 | -1.795831 | 0.0009119 | previous<br>version<br>conserved<br>probe |
| 0.000002 | 0.000013 | 2673.7251  | 1329.95459 | -1.06799  | 0.0216612 | TUT1                                      |
| 0.000214 | 0.015158 | 707.473267 | 336.552155 | -1.18315  | 0.0201449 | SAA1                                      |
| 0.039718 | 0.807376 | 286.133636 | 124.29483  | -1.218481 | 0.0345627 | C21orf49                                  |
| 0.000001 | 0.000007 | 3567.76172 | 1670.3313  | -1.157881 | 0.0136651 | C1orf233                                  |
| 0.000009 | 0.005901 | 1544.91199 | 392.962891 | -2.07836  | 0.0003907 | previous<br>version<br>conserved<br>probe |
| 0.000005 | 0.000054 | 1863.53711 | 931.255066 | -1.085221 | 0.0214497 | TNFSF12                                   |
| 0.000001 | 0.000001 | 9854.31641 | 4842.71777 | -1.020005 | 0.0241168 | ADSL                                      |
| 0.000007 | 0.000132 | 1697.93591 | 767.759583 | -1.243    | 0.0108088 | TMEM234                                   |
| 0.000153 | 0.023965 | 754.638184 | 311.693176 | -1.380145 | 0.0087108 | CSTF3                                     |

|          |          |            |            |           |           |           |
|----------|----------|------------|------------|-----------|-----------|-----------|
| 0.000003 | 0.000028 | 2294.30957 | 1091.8822  | -1.138679 | 0.0161064 | SNAPC3    |
| 0.000001 | 0.000001 | 8852.3252  | 3622.71606 | -1.294114 | 0.0065613 | EIF4E2    |
| 0.001665 | 0.182572 | 489.466705 | 212.257324 | -1.287948 | 0.0171588 | LNX1      |
| 0.025505 | 0.603365 | 309.192017 | 148.197678 | -1.096082 | 0.0484985 | CEP152    |
| 0.002673 | 0.897004 | 450.686676 | 110.909233 | -2.047606 | 0.001425  | WHSC1     |
| 0.000002 | 0.000007 | 3352.89941 | 1673.19958 | -1.065399 | 0.0212053 | ASPH      |
| 0.000071 | 0.004814 | 887.747986 | 406.34848  | -1.238676 | 0.0141826 | PRKCB     |
| 0.00361  | 0.280959 | 428.676422 | 191.222809 | -1.238208 | 0.0226693 | TGM2      |
| 0.019925 | 0.956443 | 322.817444 | 97.523636  | -1.734762 | 0.0058403 | RGS4      |
| 0.000002 | 0.000012 | 2966.14722 | 1370.11145 | -1.175563 | 0.0129522 | DPM3      |
| 0.000006 | 0.000054 | 1775.49597 | 928.386719 | -1.022638 | 0.0292698 | PDE7A     |
| 0.       | 0.000001 | 14563.4688 | 5601.87207 | -1.344087 | 0.0050683 | FST       |
| 0.003078 | 0.265268 | 440.205597 | 194.091156 | -1.256263 | 0.0207779 | YPEL1     |
| 0.000331 | 0.146432 | 649.827332 | 222.774582 | -1.630164 | 0.0037295 | C2orf68   |
| 0.000018 | 0.000512 | 1247.24927 | 593.746826 | -1.175729 | 0.0160849 | NPB       |
| 0.000001 | 0.000002 | 6913.32422 | 2935.27026 | -1.244978 | 0.0084391 | LEPROT    |
| 0.000564 | 0.009527 | 879.363098 | 363.323334 | -1.381021 | 0.0203297 | PGBD3     |
| 0.000028 | 0.000557 | 1108.89893 | 585.141785 | -1.026916 | 0.0319059 | CDC20     |
|          |          |            |            |           |           | previous  |
| 0.000013 | 0.000551 | 1383.5033  | 603.307983 | -1.302466 | 0.00912   | version   |
|          |          |            |            |           |           | conserved |
|          |          |            |            |           |           | probe     |
| 0.000001 | 0.000003 | 5252.07227 | 2427.57349 | -1.142585 | 0.0140436 | TFPI      |
| 0.000312 | 0.669609 | 657.164062 | 131.943741 | -2.354762 | 0.0006728 | DID01     |
| 0.000004 | 0.000032 | 2023.89771 | 1049.81323 | -1.021679 | 0.0281043 | PHF14     |
| 0.086975 | 0.982179 | 247.353622 | 87.006378  | -1.498872 | 0.0168337 | KLK3      |
| 0.000014 | 0.000703 | 1327.95361 | 561.238953 | -1.347845 | 0.007478  | PCDH1     |
| 0.000306 | 0.012358 | 659.260315 | 350.89386  | -1.026244 | 0.0394812 | BRWD1     |
| 0.000301 | 0.028774 | 661.356506 | 302.13205  | -1.238857 | 0.0166633 | IL36RN    |
|          |          |            |            |           |           | previous  |
| 0.000099 | 0.003185 | 825.909546 | 435.031891 | -1.041113 | 0.0334038 | version   |
|          |          |            |            |           |           | conserved |
|          |          |            |            |           |           | probe     |
|          |          |            |            |           |           | previous  |
| 0.000011 | 0.011876 | 1422.28333 | 395.831207 | -1.948707 | 0.0007313 | version   |
|          |          |            |            |           |           | conserved |
|          |          |            |            |           |           | probe     |
|          |          |            |            |           |           | previous  |
| 0.000131 | 0.953223 | 783.985229 | 98.479744  | -3.004671 | 6.763E-05 | version   |
|          |          |            |            |           |           | conserved |
|          |          |            |            |           |           | probe     |
| 0.000001 | 0.000007 | 3605.49341 | 1672.24353 | -1.171478 | 0.0128055 | RPL9      |
| 0.062996 | 0.8357   | 263.075256 | 120.470367 | -1.13518  | 0.0488173 | ZNF662    |
| 0.000043 | 0.002607 | 993.606934 | 449.373596 | -1.252802 | 0.0126626 | NOVA1     |
| 0.001049 | 0.087447 | 528.246704 | 247.633545 | -1.189368 | 0.0234606 | AGER      |
| 0.000113 | 0.060627 | 801.80304  | 264.843597 | -1.69122  | 0.0024914 | ECE2      |
| 0.000023 | 0.00213  | 1157.11182 | 464.671417 | -1.422066 | 0.0057584 | SNORD52   |
| 0.000003 | 0.02739  | 2284.87671 | 478.057037 | -2.346066 | 0.0002064 | HCP5      |
| 0.000076 | 0.137802 | 933.864746 | 225.642914 | -2.120922 | 0.0006257 | NSUN5     |
| 0.000004 | 0.000098 | 2190.54688 | 816.521423 | -1.505022 | 0.0032081 | TMEM50B   |
| 0.000005 | 0.003348 | 1947.38574 | 431.207428 | -2.273525 | 0.000181  | COL11A1   |
| 0.000002 | 0.00001  | 2973.48413 | 1447.55664 | -1.099966 | 0.0183762 | HMGCL     |
| 0.006296 | 0.603359 | 390.944489 | 148.197678 | -1.446785 | 0.011738  | CAPRIN1   |
| 0.000114 | 0.006757 | 800.754944 | 384.357849 | -1.171746 | 0.0197077 | ATXN3     |

|          |          |            |            |           |           |           |
|----------|----------|------------|------------|-----------|-----------|-----------|
| 0.000229 | 0.018023 | 696.992188 | 326.990997 | -1.202343 | 0.0187123 | TTK       |
| 0.000017 | 0.391579 | 1254.58594 | 174.012756 | -2.893276 | 4.874E-05 | SNHG3     |
| 0.000259 | 0.004291 | 786.081421 | 413.997375 | -1.042576 | 0.0422459 | ABCC3     |
| 0.000683 | 0.026732 | 571.219177 | 305.956482 | -1.010655 | 0.0448382 | ADAMTS2   |
| 0.01769  | 0.536485 | 329.106079 | 155.846588 | -1.121219 | 0.0423871 | SYNPO     |
| 0.028163 | 0.835703 | 303.951477 | 120.470367 | -1.351119 | 0.0210867 | LRCH1     |
| 0.000007 | 0.006547 | 1623.52014 | 719.953857 | -1.275024 | 0.0164472 | RACGAP1   |
| 0.000305 | 0.000369 | 1475.73682 | 630.079163 | -1.332913 | 0.0277358 | SEPSECS   |
| 0.00233  | 0.238218 | 461.167786 | 203.652298 | -1.258207 | 0.0224701 | S1PR5     |
| 0.000445 | 0.075584 | 616.287842 | 283.009766 | -1.228273 | 0.0236092 | PIGX      |
| 0.000018 | 0.000129 | 1707.3689  | 771.584045 | -1.243304 | 0.0148187 | ZNF692    |
| 0.000003 | 0.000023 | 2326.80103 | 1148.29297 | -1.085659 | 0.0204605 | TMEM48    |
| 0.000618 | 0.112663 | 599.518127 | 235.204056 | -1.440941 | 0.0090598 | ALG13     |
| 0.000083 | 0.000437 | 1445.34167 | 610.956909 | -1.347436 | 0.0156331 | CCM2      |
| 0.000018 | 0.008391 | 1238.86438 | 370.97226  | -1.839331 | 0.0010507 | KBTBD7    |
| 0.000002 | 0.001632 | 3356.0437  | 1416.00488 | -1.307088 | 0.0122046 | NAV1      |
| 0.003214 | 0.260201 | 437.061279 | 195.047272 | -1.239316 | 0.0222391 | KLHL13    |
| 0.000001 | 0.000006 | 3520.59668 | 1699.97083 | -1.112616 | 0.0169843 | PWWP2A    |
| 0.001749 | 0.240749 | 485.274261 | 198.871719 | -1.363569 | 0.0130418 | SSX2IP    |
| 0.000273 | 0.016843 | 673.933838 | 330.81546  | -1.139105 | 0.0246372 | SENP8     |
| 0.000137 | 0.00429  | 771.407898 | 413.997375 | -1.016212 | 0.038025  | TNFAIP8L1 |
|          |          |            |            |           |           | previous  |
|          |          |            |            |           |           | version   |
| 0.000331 | 0.011776 | 649.827332 | 350.89386  | -1.005518 | 0.042786  | conserved |
|          |          |            |            |           |           | probe     |
| 0.000906 | 0.792499 | 541.872131 | 126.207054 | -2.13756  | 0.0008538 | FAM13C    |
| 0.000002 | 0.000064 | 2572.05835 | 895.878845 | -1.589995 | 0.0020771 | C17orf58  |
| 0.000155 | 0.000249 | 1311.18384 | 677.884888 | -1.055678 | 0.0497988 | FAM149B1  |
| 0.000004 | 0.000899 | 2039.61926 | 624.342468 | -1.802094 | 0.0010195 | KIAA0754  |
| 0.005749 | 0.398532 | 397.233154 | 173.056641 | -1.260692 | 0.0223493 | LOC643923 |
| 0.000002 | 0.000011 | 2907.45312 | 1411.22437 | -1.104026 | 0.0180976 | C7orf73   |
| 0.000006 | 0.000131 | 1791.21753 | 769.671814 | -1.313529 | 0.007767  | TXNRD3    |
|          |          |            |            |           |           | previous  |
|          |          |            |            |           |           | version   |
| 0.000003 | 0.00003  | 2507.07568 | 1071.80383 | -1.288488 | 0.0079722 | conserved |
|          |          |            |            |           |           | probe     |
| 0.001164 | 0.205742 | 518.813721 | 206.52063  | -1.408698 | 0.0103194 | PPP1R3E   |
| 0.000044 | 0.001157 | 988.366394 | 515.345459 | -1.04715  | 0.0304298 | KLHDC10   |
|          |          |            |            |           |           | previous  |
|          |          |            |            |           |           | version   |
| 0.000018 | 0.000292 | 1262.97083 | 657.806458 | -1.045548 | 0.0285195 | conserved |
|          |          |            |            |           |           | probe     |
| 0.000001 | 0.000007 | 3542.60693 | 1644.51611 | -1.170056 | 0.0129233 | BRD3      |
| 0.000087 | 0.002157 | 1134.05347 | 463.715302 | -1.395953 | 0.0109052 | MANEA     |
| 0.000005 | 0.004351 | 1865.6333  | 413.04126  | -2.275051 | 0.0001842 | AGPAT5    |
| 0.000001 | 0.000007 | 4054.08398 | 1611.05212 | -1.395094 | 0.0044606 | GJB4      |
| 0.000021 | 0.000415 | 1190.65137 | 616.693542 | -1.053723 | 0.0277916 | C3orf17   |
| 0.000128 | 0.004605 | 781.888977 | 409.216827 | -1.051244 | 0.032754  | PDGFD     |
| 0.074785 | 0.9184   | 254.690384 | 101.348091 | -1.323601 | 0.034383  | RINL      |
| 0.000002 | 0.000005 | 3573.0022  | 1856.77344 | -1.001903 | 0.0318043 | ACTR2     |
| 0.000011 | 0.000139 | 1421.23523 | 760.110657 | -1.002012 | 0.0331227 | WIPF1     |
| 0.027498 | 0.928987 | 328.057983 | 103.260315 | -1.676372 | 0.013231  | MARCKS    |

|          |          |            |            |           |           |                                           |
|----------|----------|------------|------------|-----------|-----------|-------------------------------------------|
| 0.103616 | 0.937835 | 238.96875  | 102.304207 | -1.212279 | 0.0424159 | previous<br>version<br>conserved<br>probe |
| 0.000063 | 0.027227 | 911.854492 | 305.000397 | -1.675096 | 0.0024052 | KIAA1841                                  |
| 0.009409 | 0.371189 | 365.789886 | 176.881104 | -1.10789  | 0.0409347 | EPHA5                                     |
| 0.000023 | 0.000433 | 1156.06372 | 611.912964 | -1.022376 | 0.0321055 | PLSCR1                                    |
| 0.002394 | 0.457087 | 459.071564 | 165.40773  | -1.532689 | 0.0073774 | PIGK                                      |
| 0.000002 | 0.000008 | 3270.09888 | 1534.56311 | -1.153709 | 0.0141118 | SOS1                                      |
| 0.001359 | 0.086786 | 505.188324 | 247.633545 | -1.125182 | 0.0307538 | IFI44L                                    |
| 0.000013 | 0.000381 | 1348.91577 | 626.2547   | -1.211845 | 0.0133599 | SMAD2                                     |
| 0.000002 | 0.000012 | 2899.06836 | 1394.97046 | -1.116522 | 0.0173436 | CSTF2T                                    |
| 0.00001  | 0.000418 | 1478.88123 | 758.198425 | -1.063224 | 0.027815  | RECQL                                     |
| 0.000731 | 0.028774 | 562.83429  | 302.13205  | -1.00688  | 0.0455982 | VSIG10                                    |
| 0.000002 | 0.000007 | 3262.76196 | 1662.68237 | -1.034988 | 0.0245032 | ECT2                                      |
| 0.000722 | 0.041921 | 563.882385 | 283.009766 | -1.100471 | 0.0316414 | FAM76B                                    |
| 0.000071 | 0.015157 | 885.651733 | 336.552155 | -1.497421 | 0.0049114 | PAFAH2                                    |
| 0.000002 | 0.000023 | 2769.10278 | 1151.16138 | -1.326678 | 0.0065488 | TM7SF3                                    |
| 0.000282 | 0.069632 | 669.741394 | 258.150787 | -1.473997 | 0.0065487 | PARD6G                                    |
| 0.000218 | 0.013462 | 705.377075 | 343.244934 | -1.151617 | 0.0229442 | FEM1C                                     |
| 0.0017   | 0.308861 | 486.322388 | 186.442245 | -1.453853 | 0.0092527 | WNT5A                                     |
| 0.000005 | 0.000046 | 1937.95276 | 964.719055 | -1.087092 | 0.0210872 | LYST                                      |
| 0.000142 | 0.241465 | 766.167358 | 234.24794  | -1.79344  | 0.0045891 | PRTG                                      |
| 0.000812 | 0.047058 | 552.35321  | 277.273071 | -1.099238 | 0.0321771 | PHF6                                      |
| 0.037738 | 0.860386 | 409.810455 | 106.128662 | -1.969524 | 0.0368557 | ZNF404                                    |
| 0.000003 | 0.000032 | 2192.64307 | 1049.81323 | -1.132823 | 0.0167289 | GJC1                                      |
| 0.00091  | 0.866785 | 543.968323 | 114.733688 | -2.272218 | 0.0006235 | ITGB8                                     |
| 0.000005 | 0.001057 | 1932.71216 | 522.994385 | -1.983728 | 0.000487  | PDP1                                      |
| 0.000001 | 0.000012 | 5771.93408 | 1376.8042  | -2.110541 | 0.0002194 | INSIG1                                    |
| 0.000295 | 0.018994 | 665.54895  | 324.12265  | -1.150009 | 0.0238403 | RNF24                                     |
| 0.003248 | 0.297467 | 443.349915 | 188.354462 | -1.307026 | 0.0183024 | SERBP1                                    |
| 0.000016 | 0.000824 | 1289.17358 | 545.941101 | -1.345003 | 0.0076127 | UBL4A                                     |
| 0.000001 | 0.000003 | 6027.67236 | 2397.93408 | -1.350916 | 0.0051949 | PLEKHA2                                   |
| 0.000175 | 0.137655 | 734.724121 | 226.59903  | -1.779655 | 0.0019726 | ZNF74                                     |
| 0.021001 | 0.897011 | 319.673126 | 110.909233 | -1.53852  | 0.0108446 | NAPEPLD                                   |
| 0.000007 | 0.000941 | 1689.55103 | 533.511658 | -1.768298 | 0.001164  | PFKFB2                                    |
| 0.000245 | 0.178327 | 687.559204 | 219.906235 | -1.727328 | 0.0028207 | ZC3H6                                     |
| 0.000001 | 0.000039 | 3448.2771  | 1001.05139 | -1.848418 | 0.0006595 | RNF141                                    |
| 0.000029 | 0.058288 | 1092.12915 | 266.755829 | -2.115695 | 0.0004388 | ADPRH                                     |
| 0.000011 | 0.001423 | 1522.90173 | 497.179321 | -1.721241 | 0.001594  | ATP8B2                                    |
| 0.001164 | 0.275641 | 518.813721 | 192.178925 | -1.505922 | 0.0072113 | RHN01                                     |
| 0.008634 | 0.47248  | 371.030426 | 163.495499 | -1.235558 | 0.025819  | GABRB3                                    |
| 0.006285 | 0.291875 | 394.088837 | 189.310577 | -1.127548 | 0.0371595 | SLC35D1                                   |
| 0.000048 | 0.000971 | 1451.63037 | 530.643311 | -1.557687 | 0.0058848 | SFT2D3                                    |
| 0.000031 | 0.000633 | 1073.26318 | 571.756226 | -1.013196 | 0.0341805 | OSTM1                                     |
| 0.000015 | 0.012215 | 1301.75085 | 504.828217 | -1.472349 | 0.0067429 | previous<br>version<br>conserved<br>probe |
| 0.000906 | 0.137802 | 541.872131 | 225.642914 | -1.351614 | 0.0123418 | PARP11                                    |
| 0.00004  | 0.001271 | 1010.37665 | 506.740448 | -1.102336 | 0.0238591 | SMC2                                      |
| 0.000821 | 0.103916 | 551.305115 | 239.028519 | -1.298586 | 0.014909  | GNA13                                     |
| 0.000318 | 0.001635 | 1052.30103 | 485.705933 | -1.220752 | 0.0315554 | PPIP5K2                                   |
| 0.000004 | 0.000044 | 2111.93872 | 975.236328 | -1.190298 | 0.0129506 | ZYG11B                                    |

|          |          |            |            |           |           |           |
|----------|----------|------------|------------|-----------|-----------|-----------|
| 0.00271  | 0.197718 | 449.63858  | 208.432861 | -1.190454 | 0.0260555 | ARRDC4    |
| 0.000016 | 0.000354 | 1273.4519  | 634.859741 | -1.108882 | 0.0213916 | IGSF3     |
| 0.000001 | 0.000005 | 3630.64819 | 1856.77344 | -1.025096 | 0.0253235 | FAM46A    |
| 0.000169 | 0.115561 | 739.964661 | 308.824829 | -1.365528 | 0.0213286 | SIKE1     |
| 0.000009 | 0.000311 | 1501.93958 | 650.157532 | -1.312952 | 0.0082584 | ITGA4     |
| 0.000001 | 0.000001 | 7618.70117 | 3761.35278 | -1.026894 | 0.0236874 | BCAT1     |
| 0.000014 | 0.000444 | 1326.90552 | 609.044678 | -1.228395 | 0.0124976 | RDH10     |
|          |          |            |            |           |           | previous  |
| 0.000015 | 0.000071 | 1782.83264 | 875.800476 | -1.115027 | 0.0243251 | version   |
|          |          |            |            |           |           | conserved |
|          |          |            |            |           |           | probe     |
| 0.00056  | 0.093958 | 590.085144 | 243.809082 | -1.369596 | 0.0107856 | AN07      |
| 0.001744 | 0.611851 | 484.226166 | 147.241562 | -1.766996 | 0.0031181 | CRYBG3    |
| 0.094862 | 0.942711 | 243.161194 | 101.348091 | -1.252514 | 0.036405  | KATNAL2   |
| 0.000998 | 0.535771 | 538.727783 | 155.846588 | -1.843445 | 0.0023289 | TWSG1     |
| 0.000018 | 0.000391 | 1250.39355 | 623.386353 | -1.108865 | 0.0215331 | SCAF11    |
| 0.00006  | 0.001734 | 921.287415 | 480.925354 | -1.048864 | 0.0309818 | LETM1     |
| 0.002065 | 0.083314 | 470.600739 | 249.545761 | -1.012799 | 0.0490174 | TMEM56    |
| 0.000043 | 0.002028 | 993.606934 | 468.49588  | -1.19249  | 0.016358  | PHKA1     |
| 0.000567 | 0.041119 | 607.902954 | 283.965881 | -1.203883 | 0.0218128 | CSNK1E    |
| 0.115566 | 0.954098 | 233.72821  | 92.743065  | -1.319806 | 0.0376376 | SLC35B4   |
| 0.000001 | 0.000005 | 3668.38013 | 1862.51013 | -1.035459 | 0.0241046 | PPP1R3B   |
| 0.000002 | 0.000011 | 2691.54272 | 1393.05823 | -1.010862 | 0.0281823 | IL17RD    |
| 0.000198 | 0.027731 | 716.90625  | 304.044281 | -1.342929 | 0.0104491 | ERCC6     |
| 0.000005 | 0.000284 | 2118.22754 | 661.63092  | -1.770622 | 0.0011795 | NUFIP2    |
| 0.011319 | 0.702762 | 361.597473 | 136.724304 | -1.439286 | 0.0149224 | SLC16A12  |
| 0.000138 | 0.303495 | 770.359802 | 265.799713 | -1.63038  | 0.0397334 | PLSCR4    |
| 0.001248 | 0.993584 | 520.909973 | 77.445236  | -2.770036 | 0.000216  | ZSWIM1    |
| 0.000354 | 0.0227   | 641.442444 | 314.561523 | -1.13883  | 0.0252962 | ZNF345    |
| 0.00001  | 0.897041 | 1465.25574 | 110.909233 | -3.727633 | 1.058E-05 | CIRBP     |
| 0.000027 | 0.003216 | 1109.94702 | 434.075775 | -1.460492 | 0.0050083 | RNF187    |
| 0.085112 | 0.930734 | 248.401733 | 104.216431 | -1.244971 | 0.0364731 | FXN       |
| 0.000213 | 0.00764  | 706.425171 | 376.708923 | -1.024338 | 0.0382105 | RNASEH2C  |
| 0.000002 | 0.000006 | 3338.22583 | 1722.91748 | -1.015456 | 0.0267445 | TNK2      |
|          |          |            |            |           |           | previous  |
| 0.000046 | 0.002296 | 979.981506 | 458.934753 | -1.203013 | 0.0157365 | version   |
|          |          |            |            |           |           | conserved |
|          |          |            |            |           |           | probe     |
| 0.000001 | 0.000002 | 5588.51514 | 2611.14746 | -1.11904  | 0.0156102 | PTRF      |
| 0.000348 | 0.017404 | 648.779236 | 328.903229 | -1.093191 | 0.0306299 | NASP      |
| 0.000126 | 0.013692 | 789.225769 | 342.288818 | -1.312643 | 0.0112891 | RNF213    |
| 0.002027 | 0.083304 | 472.69696  | 249.545761 | -1.019191 | 0.0478891 | MAF       |
| 0.000156 | 0.19382  | 751.493835 | 209.388977 | -1.91793  | 0.001177  | ZSCAN2    |
| 0.000071 | 0.008776 | 885.651733 | 369.060028 | -1.369207 | 0.0082841 | TMEM144   |
| 0.000651 | 0.028771 | 574.363525 | 302.13205  | -1.036041 | 0.0402683 | MEGF6     |
| 0.000001 | 0.000006 | 4274.18701 | 1751.60095 | -1.347217 | 0.0055182 | POLR1A    |
| 0.000009 | 0.000121 | 1588.93262 | 782.101318 | -1.120838 | 0.019582  | WDR52     |
| 0.012927 | 0.907485 | 346.92395  | 108.997002 | -1.684369 | 0.006151  | AKT2      |
| 0.000008 | 0.001034 | 1587.88452 | 524.906616 | -1.703094 | 0.0015523 | MTR       |
| 0.000008 | 0.000134 | 1594.1731  | 765.847351 | -1.156811 | 0.0161762 | HGSNAT    |
|          |          |            |            |           |           | previous  |
| 0.00591  | 0.639948 | 395.136932 | 142.460999 | -1.516207 | 0.0107331 | version   |
|          |          |            |            |           |           | conserved |
|          |          |            |            |           |           | probe     |

|          |          |            |            |           |           |           |
|----------|----------|------------|------------|-----------|-----------|-----------|
| 0.000117 | 0.005814 | 796.5625   | 393.918976 | -1.130235 | 0.023456  | STX17     |
| 0.000001 | 0.000005 | 4027.88135 | 1803.23108 | -1.219378 | 0.0100828 | NFATC2IP  |
| 0.036592 | 0.921893 | 290.32608  | 106.128662 | -1.454254 | 0.0159127 | C2orf72   |
| 0.000009 | 0.000198 | 1550.15259 | 708.48053  | -1.23206  | 0.0116682 | C5orf24   |
| 0.000004 | 0.000235 | 2097.26538 | 686.489868 | -1.70244  | 0.0013865 | CALM3     |
| 0.000084 | 0.002324 | 855.256592 | 457.978638 | -1.01557  | 0.0366194 | TPD52     |
| 0.000001 | 0.000002 | 5714.28809 | 2835.83423 | -1.029947 | 0.0237391 | TK2       |
| 0.322882 | 0.998435 | 183.419006 | 66.927986  | -1.418479 | 0.0322154 | METTL8    |
| 0.000002 | 0.000018 | 2579.39526 | 1226.69434 | -1.133588 | 0.0161147 | BTRC      |
| 0.00004  | 0.002476 | 1012.4729  | 453.198059 | -1.266853 | 0.011829  | CPEB1     |
| 0.000413 | 0.08671  | 623.624634 | 247.633545 | -1.428071 | 0.0082563 | ACVR2B    |
| 0.006435 | 0.152405 | 509.380768 | 220.86235  | -1.291616 | 0.0423709 | CEP85     |
| 0.000003 | 0.000054 | 2441.04492 | 930.29895  | -1.461402 | 0.0038004 | IMPACT    |
| 0.000041 | 0.052572 | 1003.03992 | 441.724701 | -1.290869 | 0.0261099 | ETV1      |
| 0.000029 | 0.001868 | 1090.03296 | 475.18869  | -1.303355 | 0.0097959 | CDK12     |
| 0.00002  | 0.001391 | 1203.22864 | 499.091522 | -1.375133 | 0.0068946 | CRB2      |
| 0.002952 | 0.222635 | 468.504547 | 202.696182 | -1.287263 | 0.0216555 | TMF1      |
| 0.01293  | 0.637324 | 346.92395  | 144.373215 | -1.303622 | 0.0216524 | STAM2     |
| 0.011612 | 0.679633 | 355.308807 | 139.592651 | -1.384936 | 0.0165877 | CTBS      |
| 0.000011 | 0.000237 | 1414.94653 | 684.577637 | -1.15116  | 0.017186  | BBS10     |
| 0.000013 | 0.000448 | 1371.97412 | 608.088562 | -1.278948 | 0.0099386 | ERO1L     |
| 0.001815 | 0.081666 | 487.370483 | 250.501877 | -1.057988 | 0.0419289 | DMXL2     |
| 0.000444 | 0.028774 | 615.239746 | 302.13205  | -1.13491  | 0.0263012 | SLC9B2    |
| 0.000017 | 0.000267 | 1254.58594 | 669.279846 | -1.010887 | 0.0329358 | SPAST     |
| 0.00001  | 0.00055  | 1457.91907 | 586.0979   | -1.420079 | 0.0052374 | SOCS6     |
| 0.000005 | 0.000052 | 2596.16504 | 939.860107 | -1.53171  | 0.003721  | EEF2K     |
| 0.000003 | 0.000021 | 2242.95239 | 1168.37134 | -1.009761 | 0.029567  | DCK       |
| 0.001637 | 0.093957 | 489.466705 | 243.809082 | -1.100742 | 0.0344097 | RBM12B    |
| 0.000348 | 0.011209 | 747.301392 | 353.762207 | -1.190429 | 0.0255459 | NRP1      |
| 0.000002 | 0.000014 | 2747.09253 | 1321.34961 | -1.116566 | 0.0176339 | MRI1      |
| 0.022252 | 0.926059 | 316.528778 | 105.172546 | -1.596419 | 0.0091582 | UBN2      |
| 0.00002  | 0.000327 | 1203.22864 | 644.420898 | -1.005261 | 0.0341593 | PCDH7     |
| 0.       | 0.000001 | 11625.6201 | 4989.00293 | -1.206426 | 0.0098054 | ADAM9     |
| 0.000001 | 0.000003 | 5012.05518 | 2372.1189  | -1.112689 | 0.0162768 | COL4A4    |
| 0.000002 | 0.000009 | 3127.55591 | 1483.88904 | -1.137477 | 0.0153221 | C6orf89   |
| 0.000045 | 0.000197 | 1566.92236 | 709.436646 | -1.245608 | 0.0189898 | SRI       |
| 0.000247 | 0.009681 | 688.607361 | 362.367218 | -1.042568 | 0.0360549 | LMBR1     |
| 0.000004 | 0.000067 | 2106.69824 | 888.22998  | -1.325742 | 0.0070429 | SORL1     |
|          |          |            |            |           |           | previous  |
| 0.000001 | 0.000003 | 4573.9458  | 2226.78955 | -1.081234 | 0.0190065 | version   |
|          |          |            |            |           |           | conserved |
|          |          |            |            |           |           | probe     |
| 0.000001 | 0.000002 | 6967.82568 | 3300.50562 | -1.087701 | 0.0178076 | MSL1      |
| 0.000009 | 0.00024  | 1518.70935 | 682.665405 | -1.257608 | 0.0105824 | CNOT6L    |
| 0.000027 | 0.004056 | 1112.04321 | 417.821838 | -1.517862 | 0.0039494 | SSPN      |
| 0.000011 | 0.002445 | 1420.18713 | 454.154175 | -1.751309 | 0.0013569 | ANGEL1    |
| 0.000003 | 0.000018 | 2357.19629 | 1223.82593 | -1.011937 | 0.0285719 | MCOLN3    |
| 0.000005 | 0.000198 | 1874.01819 | 708.48053  | -1.499373 | 0.0033862 | ERAP2     |
| 0.002362 | 0.119652 | 460.119659 | 232.335709 | -1.076937 | 0.0391115 | PGM2      |
| 0.       | 0.000001 | 16386.1289 | 7133.56689 | -1.146065 | 0.0129249 | GNPTAB    |
|          |          |            |            |           |           | previous  |
| 0.000393 | 0.032166 | 632.00946  | 296.395355 | -1.20024  | 0.0201894 | version   |
|          |          |            |            |           |           | conserved |
|          |          |            |            |           |           | probe     |

|          |          |            |            |           |           |                           |
|----------|----------|------------|------------|-----------|-----------|---------------------------|
| 0.000026 | 0.001315 | 1124.62048 | 503.872101 | -1.26368  | 0.011443  | PTAR1                     |
| 0.000077 | 0.161901 | 557.59375  | 217.994003 | -1.439329 | 0.0086642 | FAM102B                   |
| 0.001025 | 0.214    | 530.342957 | 204.608414 | -1.452872 | 0.008593  | CCNA2                     |
| 0.       | 0.000001 | 34734.3164 | 11811.833  | -1.509113 | 0.0023977 | COL5A1                    |
| 0.000009 | 0.000168 | 1510.32446 | 731.427246 | -1.147062 | 0.0171577 | UBIAD1                    |
| 0.000003 | 0.000019 | 2371.86963 | 1205.65979 | -1.042084 | 0.0249756 | SEMA5A                    |
| 0.000002 | 0.00001  | 2879.1543  | 1431.30273 | -1.069509 | 0.0218767 | CAV2                      |
| 0.000003 | 0.000086 | 2334.1377  | 838.512024 | -1.55364  | 0.0024963 | CPSF6                     |
| 0.000001 | 0.000002 | 5914.47656 | 2983.07593 | -1.004727 | 0.0266546 | NDFIP1                    |
| 0.000005 | 0.000045 | 1922.23108 | 970.45575  | -1.066976 | 0.0231339 | ZNF346                    |
| 0.129947 | 0.985221 | 228.487671 | 85.094154  | -1.409186 | 0.0249578 | MYEF2                     |
| 0.000005 | 0.000152 | 1864.58521 | 746.725098 | -1.414228 | 0.0049215 | C9orf64                   |
| 0.000008 | 0.000261 | 1586.83643 | 672.148193 | -1.344111 | 0.0071971 | SPCS3                     |
| 0.000002 | 0.00002  | 2956.71436 | 1188.44983 | -1.375773 | 0.0051658 | FAM126A                   |
| 0.000014 | 0.003682 | 1334.24219 | 424.514648 | -1.758757 | 0.001364  | TMEM19                    |
| 0.00001  | 0.000216 | 1486.21802 | 697.007141 | -1.195448 | 0.013909  | UBTD2                     |
| 0.008475 | 0.821776 | 373.126648 | 122.382599 | -1.636311 | 0.0066614 | CFHR1 CFH                 |
| 0.000015 | 0.000267 | 1297.55847 | 669.279846 | -1.059566 | 0.0263892 | DHFR DHFRL1               |
| 0.169326 | 0.99487  | 215.91037  | 75.533012  | -1.494254 | 0.0215078 | TRIM6-TRIM34 TRIM34       |
| 0.001296 | 0.201662 | 509.380768 | 207.476746 | -1.376071 | 0.0118335 | ZNF761                    |
| 0.000002 | 0.000009 | 3045.80347 | 1514.48462 | -1.069705 | 0.0210841 | LOC653562 SLC6A10P SLC6A8 |
| 0.000002 | 0.000013 | 3105.54565 | 1341.42798 | -1.272582 | 0.0082322 | EIF5A                     |
| 0.000007 | 0.0013   | 1628.76074 | 504.828217 | -1.796279 | 0.001062  | FAM156A FAM156B           |
| 0.033457 | 0.880173 | 296.614716 | 113.777573 | -1.392019 | 0.0198153 | FAM120C                   |
| 0.000004 | 0.000095 | 2108.79443 | 822.258057 | -1.441829 | 0.004188  | FLAD1                     |
| 0.000032 | 0.007882 | 1090.03296 | 374.796722 | -1.640075 | 0.0025365 | ATAT1                     |
| 0.00004  | 0.073903 | 1011.4248  | 255.282455 | -2.065832 | 0.0005546 | ZNF783                    |
| 0.000129 | 0.01416  | 1015.61719 | 340.376617 | -1.673285 | 0.0044025 | HMG3                      |
| 0.000168 | 0.019677 | 739.964661 | 322.210449 | -1.306527 | 0.0118581 | NR3C1                     |
| 0.002317 | 0.412705 | 462.215881 | 171.144409 | -1.49639  | 0.0083864 | FAM178A                   |
| 0.000612 | 0.02396  | 580.652161 | 311.693176 | -1.00838  | 0.0446033 | SEL1L                     |
| 0.000144 | 0.009529 | 764.071167 | 363.323334 | -1.184396 | 0.0191574 | WBSCR16 LOC653375         |
| 0.00001  | 0.000214 | 1472.59253 | 697.963257 | -1.180098 | 0.0150309 | TFB1M                     |
| 0.000028 | 0.00278  | 1105.75452 | 444.593048 | -1.420374 | 0.0059309 | FAM19A5                   |
| 0.000036 | 0.004152 | 1040.77185 | 501.003754 | -1.160282 | 0.0217663 | CDH19                     |
| 0.000402 | 0.039586 | 626.768921 | 285.878113 | -1.238503 | 0.0172552 | SPATA6                    |
| 0.000012 | 0.000185 | 1379.31091 | 718.041626 | -1.043357 | 0.0278563 | SYNJ2                     |
| 0.005903 | 0.332759 | 395.136932 | 182.617783 | -1.18014  | 0.029842  | FAM115C                   |
| 0.000011 | 0.001763 | 1450.58228 | 550.72168  | -1.502891 | 0.0040766 | ZNF839                    |
| 0.000009 | 0.0001   | 1551.20068 | 813.653076 | -1.027317 | 0.0289958 | QKI                       |
| 0.000002 | 0.000014 | 3087.72778 | 1309.87622 | -1.298518 | 0.0072878 | TMEM51                    |
| 0.000272 | 0.064323 | 673.933838 | 261.97525  | -1.462863 | 0.0068046 | TMEM139                   |
| 0.000003 | 0.000023 | 2307.93506 | 1148.29297 | -1.07436  | 0.0215768 | HEATR1                    |
| 0.000018 | 0.004949 | 1244.10486 | 404.436249 | -1.725338 | 0.0016341 | XKR8 RNF216P1             |
| 0.000078 | 0.022297 | 953.778809 | 315.517639 | -1.690847 | 0.0027904 | MR1                       |
| 0.039343 | 0.742224 | 318.625    | 131.943741 | -1.29837  | 0.0474836 | PTAFR                     |

|          |          |            |            |           |           |                        |
|----------|----------|------------|------------|-----------|-----------|------------------------|
| 0.008488 | 0.441994 | 372.078552 | 167.319962 | -1.208454 | 0.0283259 | ADAP2                  |
| 0.       | 0.000001 | 16628.2422 | 6571.37207 | -1.287421 | 0.0065565 | AK4                    |
| 0.000678 | 0.166391 | 570.171082 | 267.711945 | -1.193691 | 0.0476576 | CSF1                   |
| 0.000001 | 0.000013 | 3764.80591 | 1340.47192 | -1.552579 | 0.0022282 | ZDHC3                  |
| 0.000001 | 0.000005 | 3580.33887 | 1859.64185 | -1.002564 | 0.0281566 | PARD3                  |
| 0.000441 | 0.041211 | 616.287842 | 284.921997 | -1.218909 | 0.0189822 | MLKL                   |
| 0.061885 | 0.976724 | 264.123352 | 89.874718  | -1.552621 | 0.0132716 | OR4M2 OR4M1            |
| 0.003506 | 0.236117 | 430.772614 | 199.827835 | -1.185764 | 0.0273697 | POLR2J3 UPK3BL POLR2J2 |
| 0.000001 | 0.000004 | 4266.8501  | 2007.83948 | -1.140393 | 0.0144992 | FXD2 FXD6-FXD2         |
| 0.000508 | 0.129711 | 600.566223 | 228.511261 | -1.482449 | 0.0069188 | EGFL8 PPT2-EGFL8       |
| 0.004522 | 0.237484 | 412.954773 | 199.827835 | -1.124415 | 0.0355866 | LOC100507172           |
| 0.296611 | 0.998667 | 187.611435 | 65.97187   | -1.473919 | 0.0258941 | LOC100652736           |
